# Supplementary material for: Achieving high-sensitivity for clinical applications using augmented exome sequencing
Source: Genome Med. 2015 Jul 16;7(1):71. doi: 10.1186/s13073-015-0197-4 (PMC4534066; doi:10.1186/s13073-015-0197-4)
Supplement: Additional file 8: — daSNVs in ACMG genes where inadequate coverage was observed among at least one platform, using WES/ACE data normalized to both 12 Gb and 100× mean coverage. (XLSX 312 kb) [file 13073_2015_197_MOESM8_ESM.xlsx]

## Sheet: Sheet1
Additional File 8. daSNVs in ACMG genes where inadequate coverage was observed among at least 1 platform.
Using the NA12878 sample, the coverage depth at each daSNV loci is shown for conventional WES (SS, SSCR, NX, NG), WGS and ACE along with variant identification (HGVS, rsID) and functional information (OMIM, disease association) when available.
Inadequate coverage (<20x, highlighed in red) was observed in at least 1 platform for 2,134 daSNVs (when WES/ACE were standardized to 12Gb of sequence data) and 1,862 daSNVs (when WES/ACE were standardized to 100x mean coverage)
At 12Gb sequence data for WES/ACE, adequate coverage (>20x) in the most loci were observed in ACE (2105), followed by SSCR (2022), NX (1899), SS (1563), WGS (1240), and NG (1193)
At 100 mean coverage for WES/ACE, adequate coverage (>20x) in the most loci were observed in ACE (1836), followed by SSCR (1727), NX (1653), SS (1435), NG (1100) and WGS (968)
WES/ACE data normalized to 12Gb total sequence data													WES/ACE data normalized to 100x mean coverage
Gene	Association	Chr:Location	OMIM	HGVS	rsID	SS	SSCR	NX	NG	WGS	ACE		Gene	Association	Chr:Location	OMIM	HGVS	rsID	SS	SSCR	NX	NG	WGS	ACE
ACTA2	Thoracic aortic aneurysms and dissections	10:90703573	102620	350A>C	NA	88	174	333	38	19	117		ACTA2	Thoracic aortic aneurysms and dissections	10.907	102620	350A>C	NA	106	111	320	56	19	143
ACTA2	Thoracic aortic aneurysms and dissections	10:90707027	102620	246C>A	NA	91	170	359	37	19	116		ACTA2	Thoracic aortic aneurysms and dissections	10.9071	102620	246C>A	NA	109	108	349	49	19	138
ACTC1	Cardiomyopathy, dilated	15:35082659	102540	1088A>G	rs121912674	42	68	28	9	18	86		ACTC1	Cardiomyopathy, dilated	15.3508	102540	1088A>G	rs121912674	45	57	38	3	18	83
ACTC1	Cardiomyopathy, hypertrophic	15:3508275	102540	997G>C	rs267606629	44	70	29	7	19	81		ACTC1	Cardiomyopathy, hypertrophic	15.3508	102540	997G>C	rs267606629	47	59	41	2	19	80
ACTC1	Cardiomyopathy, hypertrophic	15:35083337	102540	968C>T	NA	44	70	29	7	19	81		ACTC1	Cardiomyopathy, hypertrophic	15.3508	102540	968C>T	NA	47	59	41	2	19	80
ACTC1	Cardiomyopathy, dilated	15:35083364	102540	941G>A	rs121912673	46	69	31	11	21	79		ACTC1	Cardiomyopathy, dilated	15.3508	102540	941G>A	rs121912673	48	55	42	3	21	79
ACTC1	Cardiomyopathy, hypertrophic	15:35083365	102540	940C>T	NA	47	71	31	12	22	79		ACTC1	Cardiomyopathy, hypertrophic	15.3508	102540	940C>T	NA	49	60	40	3	22	79
ACTC1	Cardiomyopathy, restrictive	15:35083368	102540	937G>C	NA	48	75	35	10	23	71		ACTC1	Cardiomyopathy, restrictive	15.3508	102540	937G>C	NA	53	60	48	4	23	69
ACTC1	Cardiomyopathy, hypertrophic	15:35084722	102540	503A>G	NA	103	131	47	18	22	63		ACTC1	Cardiomyopathy, hypertrophic	15.3508	102540	919A>C	NA	80.83	76.33	68.25	16.42	25.08	60.33
ACTC1	Cardiomyopathy, hypertrophic	15:35086982	102540	28C>A	NA	69	64	113	14	27	53		ACTC1	Cardiomyopathy, hypertrophic	15.3508	102540	889G>T	rs121912675	75	71	67	14	25	59
APC	Adenomatous polyposis coli	5:11212817	611731	673G>T	NA	46	107	198	19	33	44		ACTC1	Cardiomyopathy, hypertrophic	15.3508	102540	818C>T	NA	83	79	73	18	25	60
APC	Adenomatous polyposis coli	5:112128201	611731	704T>A	NA	43	105	168	17	28	40		ACTC1	Cardiomyopathy, non-compaction, left ventricular	15.3508	102540	811A>G	NA	95	78	73	18	25	62
APC	Adenomatous polyposis coli	5:112128203	611731	706C>T	NA	41	98	169	18	31	38		APC	Adenomatous polyposis coli	5.11213	611731	706C>T	NA	49	75	170	18	31	45
APC	Adenomatous polyposis coli	5:112151175	611731	835-17A>G	NA	0	0	0	0	34	2		APC	Adenomatous polyposis coli	5.11215	611731	835-17A>G	NA	0	0	0	0	34	2
APC	Adenomatous polyposis coli	5:112151184	611731	835-8A>G	NA	0	0	0	49	27	0		APC	Adenomatous polyposis coli	5.11215	611731	835-8A>G	NA	0	0	0	55	27	0
APC	Adenomatous polyposis coli	5:112151185	611731	835-7T>G	NA	0	0	0	1	22	7		APC	Adenomatous polyposis coli	5.11215	611731	835-7T>G	NA	0	0	0	2	22	7
APC	Adenomatous polyposis coli	5:112151191	611731	835-1G>A	NA	0	0	1	0	28	1		APC	Adenomatous polyposis coli	5.11215	611731	835-1G>A	NA	0	0	1	0	28	1
APC	Adenomatous polyposis coli	5:112154801	611731	1072C>T	NA	17	156	170	115	23	96		APC	Adenomatous polyposis coli	5.11215	611731	1111_1112delGG	NA	34	36	4	2	17	64
APC	Adenomatous polyposis coli	5:11215484	611731	1111_1112delGG	NA	27	41	2	2	17	62		APC	Adenomatous polyposis coli	5.11215	611731	1111G>T	NA	34	36	4	2	17	64
APC	Adenomatous polyposis coli	5:11215484	611731	1111G>T	NA	27	41	2	2	17	62		APC	Adenomatous polyposis coli	5.11217	611731	1756A>T	NA	80	55	21	10	31	70
APC	Adenomatous polyposis coli	5:112162891	611731	1495C>T	rs137854580	63	66.4	72.2	16.4	26.9	62.9		APC	Adenomatous polyposis coli	5.11217	611731	1759delA	NA	80	50	23	11	27	76
APC	Adenomatous polyposis coli	5:112162896	611731	1500T>G	NA	62	66	70	15	29	60		APC	Adenomatous polyposis coli	5.11217	611731	1775T>G	NA	55	48	28	10	26	75
APC	Adenomatous polyposis coli	5:112162896	611731	1500T>A	NA	62	66	70	15	29	60		APC	Adenomatous polyposis coli	5.11217	611731	1775T>A	NA	55	48	28	10	26	75
APC	Adenomatous polyposis coli	5:112162898	611731	1502C>T	NA	63	67	76	15	27	61		APC	Adenomatous polyposis coli	5.11217	611731	1775delT	NA	55	48	28	10	26	75
APC	Adenomatous polyposis coli	5:11217066	611731	1756A>T	NA	69	83	21	11	31	63		APC	Adenomatous polyposis coli	5.11217	611731	1778G>A	NA	48	49	39	12	32	72
APC	Adenomatous polyposis coli	5:112170663	611731	1759delA	NA	70	77	24	13	27	69		APC	Adenomatous polyposis coli	5.11217	611731	1779G>A	NA	47	47	40	9.75	31	72
APC	Adenomatous polyposis coli	5:112170679	611731	1775T>G	NA	54	64	25	12	26	69		APC	Adenomatous polyposis coli	5.11217	611731	1787C>G	NA	45	46	40	10	30	72
APC	Adenomatous polyposis coli	5:112170679	611731	1775T>A	NA	54	64	25	12	26	69		APC	Adenomatous polyposis coli	5.11217	611731	1797C>A	NA	42	48	39	9	28	77
APC	Adenomatous polyposis coli	5:112170679	611731	1775delT	NA	54	64	25	12	26	69		APC	Adenomatous polyposis coli	5.11217	611731	1805delA	NA	36	51	39	10	33	78
APC	Adenomatous polyposis coli	5:112170682	611731	1778G>A	NA	45	66	39	13	32	67		APC	Adenomatous polyposis coli	5.11217	611731	1812delT	NA	35	53	40	12	32	81
APC	Adenomatous polyposis coli	5:112170683	611731	1779G>A	NA	44.75	63.5	45	9.75	31	66.25		APC	Adenomatous polyposis coli	5.11217	611731	1817delT	NA	34	55	41	11	29	77
APC	Adenomatous polyposis coli	5:112170691	611731	1787C>G	NA	44	62	46	10	30	67		APC	Adenomatous polyposis coli	5.11217	611731	1825delG	NA	26	42	49	6	25	61
APC	Adenomatous polyposis coli	5:112170701	611731	1797C>A	NA	41	63	45	9	28	73		APC	Adenomatous polyposis coli	5.11217	611731	1829delA	NA	16	34	49	5	25	58
APC	Adenomatous polyposis coli	5:112170709	611731	1805delA	NA	35	60	49	10	33	71		APC	Adenomatous polyposis coli	5.11217	611731	1847delT	NA	16	26	43	3	23	53
APC	Adenomatous polyposis coli	5:112170716	611731	1812delT	NA	34	64	49	11	32	76		APC	Adenomatous polyposis coli	5.11217	611731	1849delG	NA	16.33	25.67	44.33	3	24.33	52.33
APC	Adenomatous polyposis coli	5:112170721	611731	1817delT	NA	33	68	51	11	29	73		APC	Adenomatous polyposis coli	5.11217	611731	1865delA	NA	13	22	34	3	24	46
APC	Adenomatous polyposis coli	5:112170729	611731	1825delG	NA	25	54	57	5	25	52		APC	Adenomatous polyposis coli	5.11217	611731	1863_1866dupTTAC	NA	14	21	33	3	24	46
APC	Adenomatous polyposis coli	5:112170733	611731	1829delA	NA	16	48	53	5	25	52		APC	Adenomatous polyposis coli	5.11217	611731	1866C>G	NA	14	21	33	3	24	46
APC	Adenomatous polyposis coli	5:112170751	611731	1847delT	NA	15	40	46	3	23	45		APC	Adenomatous polyposis coli	5.11217	611731	1866_1870delCCGGA	NA	14	21	33	3	24	46
APC	Adenomatous polyposis coli	5:112170753	611731	1849delG	NA	15.33	40	46.67	3	24.33	45		APC	Adenomatous polyposis coli	5.11217	611731	1866C>A	NA	14	21	33	3	24	46
APC	Adenomatous polyposis coli	5:112170769	611731	1865delA	NA	12	35	40	2	24	38		APC	Adenomatous polyposis coli	5.11217	611731	2099delA	NA	32	43	0	0	34	49
APC	Adenomatous polyposis coli	5:11217077	611731	1863_1866dupTTAC	NA	13	35	39	2	24	39		APC	Adenomatous polyposis coli	5.11217	611731	2110delG	NA	49	100	4	11	29	106
APC	Adenomatous polyposis coli	5:11217077	611731	1866C>G	NA	13	35	39	2	24	39		APC	Adenomatous polyposis coli	5.11217	611731	2116delA	NA	80	150	3	20	35	167
APC	Adenomatous polyposis coli	5:11217077	611731	1866_1870delCCGGA	NA	13	35	39	2	24	39		APC	Adenomatous polyposis coli	5.11217	611731	2130delC	NA	80	149	3	19	31	173
APC	Adenomatous polyposis coli	5:11217077	611731	1866C>A	NA	13	35	39	2	24	39		APC	Adenomatous polyposis coli	5.11217	611731	2138C>G	rs137854570	85	153	4	21	34	175
APC	Adenomatous polyposis coli	5:112173297	611731	2006T>G	NA	37.86	103.29	17.57	38.43	24.29	75.43		APC	Adenomatous polyposis coli	5.11217	611731	2164A>G	NA	83	165	5	22	35	181
APC	Adenomatous polyposis coli	5:112173387	611731	2096G>A	NA	36	59	66	19	24	70		APC	Adenomatous polyposis coli	5.11217	611731	2169delT	NA	84	162	6	26	35	184
APC	Adenomatous polyposis coli	5:112173388	611731	2097G>A	NA	34	52	54	17	29	72		APC	Adenomatous polyposis coli	5.11217	611731	2205delG	NA	86	178	7	26	35	194
APC	Adenomatous polyposis coli	5:11217339	611731	2099delA	NA	27	63	2	2	34	42		APC	Adenomatous polyposis coli	5.11217	611731	2234delC	NA	88	180	7	26	41	200
APC	Adenomatous polyposis coli	5:112173401	611731	2110delG	NA	42	145	3	10	29	85		APC	Adenomatous polyposis coli	5.11217	611731	2819C>A	NA	176	120	177	49	19	92
APC	Adenomatous polyposis coli	5:112173407	611731	2116delA	NA	64	230	3	18	35	125		APC	Adenomatous polyposis coli	5.11217	611731	2821G>T	NA	176	120	177	49	19	92
APC	Adenomatous polyposis coli	5:112173421	611731	2130delC	NA	63	227	3	18	31	133		APC	Adenomatous polyposis coli	5.11217	611731	2906delG	NA	172	133	149	64	17	105
APC	Adenomatous polyposis coli	5:112173429	611731	2138C>G	rs137854570	68	236	4	19	34	134		APC	Adenomatous polyposis coli	5.11217	611731	2908delA	NA	175	132	152	63	19	104
APC	Adenomatous polyposis coli	5:112173455	611731	2164A>G	NA	67	252	5	21	35	142		APC	Adenomatous polyposis coli	5.11217	611731	2983delT	NA	155	132	121	58	19	117
APC	Adenomatous polyposis coli	5:11217346	611731	2169delT	NA	69	253	6	28	35	143		APC	Adenomatous polyposis coli	5.11217	611731	2985C>A	NA	149	114	107	55	16	120
APC	Adenomatous polyposis coli	5:112173496	611731	2205delG	NA	69	266	7	27	35	153		APC	Adenomatous polyposis coli	5.11217	611731	2991T>G	NA	157	132	103	56	19	123
APC	Adenomatous polyposis coli	5:112173525	611731	2234delC	NA	70	271	8	28	41	155		APC	Adenomatous polyposis coli	5.11217	611731	2995C>T	NA	158	131	105	55	19	122
APC	Adenomatous polyposis coli	5:11217411	611731	2819C>A	NA	162	139	161	39	19	78		APC	Adenomatous polyposis coli	5.11217	611731	3054_3057delTGGA	NA	146	135	86	59	19	121
APC	Adenomatous polyposis coli	5:112174112	611731	2821G>T	NA	162	139	161	39	19	78		APC	Adenomatous polyposis coli	5.11217	611731	3054T>C	NA	146	135	86	59	19	121
APC	Adenomatous polyposis coli	5:112174197	611731	2906delG	NA	150	162	135	51	17	84		APC	Adenomatous polyposis coli	5.11217	611731	3081_3082delTA	NA	134	150	100	66	19	125
APC	Adenomatous polyposis coli	5:112174199	611731	2908delA	NA	151	161	140	50	19	83		APC	Adenomatous polyposis coli	5.11217	611731	3081T>A	NA	134	150	100	66	19	125
APC	Adenomatous polyposis coli	5:112174274	611731	2983delT	NA	138	174	106	45	19	97		APC	Adenomatous polyposis coli	5.11217	611731	3082delA	NA	137	153	99	68	19	123
APC	Adenomatous polyposis coli	5:112174276	611731	2985C>A	NA	134	162	91	46	16	100		APC	Adenomatous polyposis coli	5.11217	611731	3091delT	NA	135	158	98	72	17	132
APC	Adenomatous polyposis coli	5:112174282	611731	2991T>G	NA	139	187	94	48	19	102		APC	Adenomatous polyposis coli	5.11217	611731	3093T>G	NA	140	161	98	73	16	132
APC	Adenomatous polyposis coli	5:112174286	611731	2995C>T	NA	141	188	96	47	19	103		APC	Adenomatous polyposis coli	5.11217	611731	3095C>G	NA	141	160	103	74	16	132
APC	Adenomatous polyposis coli	5:112174345	611731	3054_3057delTGGA	NA	133	187	79	46	19	101		APC	Adenomatous polyposis coli	5.11217	611731	3095C>A	NA	141	160	103	74	16	132
APC	Adenomatous polyposis coli	5:112174345	611731	3054T>C	NA	133	187	79	46	19	101		APC	Adenomatous polyposis coli	5.11217	611731	3101delA	NA	132	159	107	71	14	135
APC	Adenomatous polyposis coli	5:112174372	611731	3081_3082delTA	NA	127	197	77	49	19	105		APC	Adenomatous polyposis coli	5.11217	611731	3121C>T	NA	130	162	110	80	14	132
APC	Adenomatous polyposis coli	5:112174372	611731	3081T>A	NA	127	197	77	49	19	105		APC	Adenomatous polyposis coli	5.11217	611731	3131C>A	NA	126	159	111	77	13	131
APC	Adenomatous polyposis coli	5:112174373	611731	3082delA	NA	129	202	76	54	19	105		APC	Adenomatous polyposis coli	5.11217	611731	3133C>T	NA	124	157	110	79	14	128
APC	Adenomatous polyposis coli	5:112174382	611731	3091delT	NA	125	204	77	61	17	112		APC	Adenomatous polyposis coli	5.11217	611731	3139G>T	NA	124	155	110	79	12	127
APC	Adenomatous polyposis coli	5:112174384	611731	3093T>G	NA	129	205	80	61	16	110		APC	Adenomatous polyposis coli	5.11217	611731	3146G>A	NA	125	157	108	79	15	123
APC	Adenomatous polyposis coli	5:112174386	611731	3095C>G	NA	129	204	84	66	16	111		APC	Adenomatous polyposis coli	5.11217	611731	3147G>A	NA	122	160	110	81	15	116
APC	Adenomatous polyposis coli	5:112174386	611731	3095C>A	NA	129	204	84	66	16	111		APC	Adenomatous polyposis coli	5.11217	611731	3148delG	NA	121	155	111	79	13	119
APC	Adenomatous polyposis coli	5:112174392	611731	3101delA	NA	118	204	87	65	14	114		APC	Adenomatous polyposis coli	5.11217	611731	3149delC	NA	118	157	109	79	14	118
APC	Adenomatous polyposis coli	5:112174412	611731	3121C>T	NA	115	212	90	79	14	112		APC	Adenomatous polyposis coli	5.11217	611731	3151delA	NA	118	157	108	77	14	115
APC	Adenomatous polyposis coli	5:112174422	611731	3131C>A	NA	112	210	89	79	13	111		APC	Adenomatous polyposis coli	5.11217	611731	3171delA	NA	103	159	128	82	14	115
APC	Adenomatous polyposis coli	5:112174424	611731	3133C>T	NA	109	204	88	79	14	108		APC	Adenomatous polyposis coli	5.11217	611731	3175G>T	NA	98	147	138	80	13	115
APC	Adenomatous polyposis coli	5:11217443	611731	3139G>T	NA	112	207	89	80	12	106		APC	Adenomatous polyposis coli	5.11217	611731	3180_3183delAAAA	NA	97	140	134	85	15	113
APC	Adenomatous polyposis coli	5:112174437	611731	3146G>A	NA	111	209	88	81	15	101		APC	Adenomatous polyposis coli	5.11217	611731	3181A>T	NA	94	138	131	81	16	113
APC	Adenomatous polyposis coli	5:112174438	611731	3147G>A	NA	109	211	93	79	15	96		APC	Adenomatous polyposis coli	5.11217	611731	3184_3187delCAAA	NA	89	134	148	87	16	108
APC	Adenomatous polyposis coli	5:112174439	611731	3148delG	NA	107	202	92	81	13	97		APC	Adenomatous polyposis coli	5.11217	611731	3184C>T	NA	89	134	148	87	16	108
APC	Adenomatous polyposis coli	5:11217444	611731	3149delC	NA	104	203	91	81	14	96		APC	Adenomatous polyposis coli	5.11217	611731	3193C>T	NA	73	118	138	78	18	100
APC	Adenomatous polyposis coli	5:112174442	611731	3151delA	NA	106	202	91	79	14	93		APC	Adenomatous polyposis coli	5.11217	611731	3196delA	NA	70	119	134	77	19	99
APC	Adenomatous polyposis coli	5:112174462	611731	3171delA	NA	95	201	120	84	14	91		APC	Adenomatous polyposis coli	5.11217	611731	3198_3201delACAA	NA	68	114	138	76	16	101
APC	Adenomatous polyposis coli	5:112174466	611731	3175G>T	NA	86	187	130	77	13	88		APC	Adenomatous polyposis coli	5.11217	611731	3367C>T	NA	17	74	33	35	15	64
APC	Adenomatous polyposis coli	5:112174471	611731	3180_3183delAAAA	NA	85	181	130	85	15	88		APC	Adenomatous polyposis coli	5.11217	611731	3371delA	NA	13	66	22	37	13	64
APC	Adenomatous polyposis coli	5:112174472	611731	3181A>T	NA	84	177	130	85	16	88		APC	Adenomatous polyposis coli	5.11218	611731	3751delG	NA	51	95	128	8	25	105
APC	Adenomatous polyposis coli	5:112174475	611731	3184_3187delCAAA	NA	77	170	140	85	16	83		APC	Adenomatous polyposis coli	5.11218	611731	3830T>G	NA	186	180	285	25	19	216
APC	Adenomatous polyposis coli	5:112174475	611731	3184C>T	NA	77	170	140	85	16	83		APC	Adenomatous polyposis coli	5.11218	611731	3830delT	NA	186	180	285	25	19	216
APC	Adenomatous polyposis coli	5:112174484	611731	3193C>T	NA	65	157	132	78	18	81		APC	Adenomatous polyposis coli	5.11218	611731	3842C>A	NA	202	200	312	26	18	229
APC	Adenomatous polyposis coli	5:112174487	611731	3196delA	NA	62	157	131	78	19	80		APC	Adenomatous polyposis coli	5.11218	611731	3845C>G	NA	205	198	334	26	18	236
APC	Adenomatous polyposis coli	5:112174489	611731	3198_3201delACAA	NA	60	150	128	76	16	82		APC	Adenomatous polyposis coli	5.11218	611731	3856G>T	NA	209	200	333	28	18	239
APC	Adenomatous polyposis coli	5:112174658	611731	3367C>T	NA	19	93	26	28	15	51		APC	Adenomatous polyposis coli	5.11218	611731	3865delT	NA	214	199	320	26	18	242
APC	Adenomatous polyposis coli	5:112174662	611731	3371delA	NA	16	83	17	30	13	51		APC	Adenomatous polyposis coli	5.11218	611731	3867T>A	NA	189	201	279	25	17	235
APC	Adenomatous polyposis coli	5:112175042	611731	3751delG	NA	40	117	130	9	25	95		APC	Adenomatous polyposis coli	5.11218	611731	3871C>G	NA	213	209	311	28	17	240
APC	Adenomatous polyposis coli	5:112175057	611731	3766C>T	NA	71	163	248	18	24	135		APC	Adenomatous polyposis coli	5.11218	611731	3871C>T	NA	213	209	311	28	17	240
APC	Adenomatous polyposis coli	5:112175106	611731	3815C>G	NA	148	224	322	19	23	203		APC	Adenomatous polyposis coli	5.11218	611731	3880delC	NA	222	208	300	28	16	242
APC	Adenomatous polyposis coli	5:112175106	611731	3815_3818delCAAG	NA	148	224	322	19	23	203		APC	Adenomatous polyposis coli	5.11218	611731	3880C>T	NA	222	208	300	28	16	242
APC	Adenomatous polyposis coli	5:112175121	611731	3830T>G	NA	174	226	279	22	19	194		APC	Adenomatous polyposis coli	5.11218	611731	3885delA	NA	232	216	310	28	16	246
APC	Adenomatous polyposis coli	5:112175121	611731	3830delT	NA	174	226	279	22	19	194		APC	Adenomatous polyposis coli	5.11218	611731	3905delT	NA	238	215	300	25	17	247
APC	Adenomatous polyposis coli	5:112175133	611731	3842C>A	NA	187	242	317	22	18	205		APC	Adenomatous polyposis coli	5.11218	611731	3907C>T	NA	234	212	292	24	19	247
APC	Adenomatous polyposis coli	5:112175136	611731	3845C>G	NA	189	237	334	22	18	211		APC	Juvenile polyposis coli	5.11218	611731	3910A>G	NA	235	218	285	22	17	242
APC	Adenomatous polyposis coli	5:112175147	611731	3856G>T	NA	194	238	329	24	18	212		APC	Adenomatous polyposis coli	5.11218	611731	3919A>T	NA	232	206	285	24	19	259
APC	Adenomatous polyposis coli	5:112175156	611731	3865delT	NA	200	241	316	21	18	214		APC	Colorectal cancer, predisposition to, association	5.11218	611731	3920T>A	rs1801155	233	208	290	23	18	258
APC	Adenomatous polyposis coli	5:112175158	611731	3867T>A	NA	177	245	285	23	17	208		APC	Adenomatous polyposis coli	5.11218	611731	3920_3923delTAAA	NA	233	208	290	23	18	258
APC	Adenomatous polyposis coli	5:112175162	611731	3871C>G	NA	199	251	308	24	17	212		APC	Adenomatous polyposis coli	5.11218	611731	3920_3924delTAAAA	NA	233	208	290	23	18	258
APC	Adenomatous polyposis coli	5:112175162	611731	3871C>T	NA	199	251	308	24	17	212		APC	Adenomatous polyposis coli	5.11218	611731	3925_3926delGA	NA	254	198	260	24	19	253
APC	Adenomatous polyposis coli	5:112175171	611731	3880delC	NA	208	255	307	25	16	213		APC	Adenomatous polyposis coli	5.11218	611731	3925G>T	NA	254	198	260	24	19	253
APC	Adenomatous polyposis coli	5:112175171	611731	3880C>T	NA	208	255	307	25	16	213		APC	Adenomatous polyposis coli	5.11218	611731	3925_3928delGAAA	NA	254	198	260	24	19	253
APC	Adenomatous polyposis coli	5:112175176	611731	3885delA	NA	215	261	310	25	16	216		APC	Adenomatous polyposis coli	5.11218	611731	3933delT	NA	184	161	214	100	19	135
APC	Adenomatous polyposis coli	5:112175196	611731	3905delT	NA	224	256	297	25	17	216		APC	Adenomatous polyposis coli	5.11218	611731	4438C>T	NA	71	49	252	19	26	87
APC	Adenomatous polyposis coli	5:112175198	611731	3907C>T	NA	221	256	291	22	19	216		APC	Colorectal adenoma	5.11218	611731	4735A>G	NA	107	90	230	33	19	112
APC	Juvenile polyposis coli	5:112175201	611731	3910A>G	NA	222	259	286	20	17	212		APC	Adenomatous polyposis coli	5.11218	611731	4786delC	NA	101	83	218	40	17	105
APC	Adenomatous polyposis coli	5:11217521	611731	3919A>T	NA	215	251	280	23	19	224		APC	Adenomatous polyposis coli	5.11218	611731	4879delC	NA	89	61	189	37	19	100
APC	Colorectal cancer, predisposition to, association	5:112175211	611731	3920T>A	rs1801155	216	256	281	21	18	223		APOB	Apolipoprotein B deficiency	2.21226	107730	12181delG	rs121918385	28	138	256	18	32	165
APC	Adenomatous polyposis coli	5:112175211	611731	3920_3923delTAAA	NA	216	256	281	21	18	223		APOB	Hypobetalipoproteinaemia	2.21229	107730	10706delA	NA	32	98	312	54	18	127
APC	Adenomatous polyposis coli	5:112175211	611731	3920_3924delTAAAA	NA	216	256	281	21	18	223		APOB	Apolipoprotein B deficiency	2.21231	107730	9175C>T	rs146377316	99	113	687	117	19	138
APC	Adenomatous polyposis coli	5:112175216	611731	3925_3926delGA	NA	231	245	258	23	19	215		APOB	Apolipoprotein B deficiency	2.21234	107730	5463delG	NA	38	93	186	88	16	84
APC	Adenomatous polyposis coli	5:112175216	611731	3925G>T	NA	231	245	258	23	19	215		APOB	Hypobetalipoproteinaemia	2.21234	107730	5344C>T	NA	43	99	192	87	17	87
APC	Adenomatous polyposis coli	5:112175216	611731	3925_3928delGAAA	NA	231	245	258	23	19	215		BRCA1	Reduced activity, association with	17.412	113705	NA	NA	25	34	11	54	32	67
APC	Adenomatous polyposis coli	5:112175224	611731	3933delT	NA	165	209	215	99	19	126		BRCA1	Breast cancer	17.412	113705	NA	NA	20	36	10	53	29	68
APC	Adenomatous polyposis coli	5:112175729	611731	4438C>T	NA	60	67	244	14	26	74		BRCA1	Breast cancer	17.412	113705	NA	NA	20	36	10	53	29	68
APC	Adenomatous polyposis coli	5:112175732	611731	4441delG	NA	60	69	236	17	28	76		BRCA1	Breast cancer	17.412	113705	NA	NA	16	38	11	59	26	63
APC	Adenomatous polyposis coli	5:112175737	611731	4446delT	NA	62	72	222	18	30	74		BRCA1	Breast cancer	17.412	113705	NA	NA	11	34	10	56	31	51
APC	Adenomatous polyposis coli	5:112175754	611731	4463dupT	NA	62	77	231	17	28	73		BRCA1	Reduced activity, association with	17.412	113705	NA	rs8176318	10	34	10	51	29	44
APC	Adenomatous polyposis coli	5:112175754	611731	4463T>G	NA	62	77	231	17	28	73		BRCA1	Breast cancer	17.412	113705	NA	NA	8	36	9	52	29	43
APC	Colorectal adenoma	5:112176026	611731	4735A>G	NA	85	117	201	32	19	97		BRCA1	Prostate cancer	17.412	113705	5573T>C	NA	55	71	1	6	30	94
APC	Adenomatous polyposis coli	5:112176077	611731	4786delC	NA	84	107	190	38	17	87		BRCA1	Breast and/or ovarian cancer	17.412	113705	5559C>G	NA	57	82	2	9	23	96
APC	Adenomatous polyposis coli	5:11217617	611731	4879delC	NA	78	85	161	34	19	84		BRCA1	Breast cancer	17.412	113705	5558dupA	NA	57	82	2	9	23	96
APOB	Hypertriglyceridaemia	2:21225597	107730	12697T>A	rs61743299	33	164	306	19	36	154		BRCA1	Breast and/or ovarian cancer	17.412	113705	5558A>G	rs80357258	68	105	12	15	21	122
APOB	Ischaemic stroke, association with	2:21225753	107730	12541G>A	rs1042031	31	168	272	18	34	153		BRCA1	Breast and/or ovarian cancer	17.412	113705	5548delC	NA	67	99	14	15	23	119
APOB	Apolipoprotein B deficiency	2:21226113	107730	12181delG	rs121918385	28	176	268	16	32	151		BRCA1	Breast and/or ovarian cancer	17.412	113705	5541C>A	NA	67	99	14	15	23	119
APOB	Hypobetalipoproteinaemia	2:21229034	107730	10706delA	NA	28	141	282	50	18	115		BRCA1	Breast and/or ovarian cancer	17.412	113705	5536C>T	rs80356873	74	106	18	18	23	123
APOB	Apolipoprotein B deficiency	2:21230565	107730	9175C>T	rs146377316	94	161	659	101	19	123		BRCA1	Breast cancer	17.412	113705	5431C>T	NA	181	116	53	28	18	88
APOB	Hypobetalipoproteinaemia	2:21233109	107730	6631delA	NA	46	119	427	17	33	86		BRCA1	Breast and/or ovarian cancer	17.412	113705	5429T>G	rs80357451	173	116	54	22	17	88
APOB	Hypertriglyceridaemia	2:21233145	107730	6595G>A	NA	45	122	424	17	32	87		BRCA1	Breast cancer	17.412	113705	5426T>C	rs80357216	123	85	53	14	17	70
APOB	Apolipoprotein B deficiency	2:21234277	107730	5463delG	NA	31	111	181	87	16	65		BRCA1	Breast and/or ovarian cancer	17.412	113705	5425G>T	rs28897698	110	79	50	13	14	63
APOB	Hypobetalipoproteinaemia	2:21234396	107730	5344C>T	NA	36	112	196	88	17	67		BRCA1	Breast and/or ovarian cancer	17.412	113705	5419delA	NA	99	78	46	9	15	57
BRCA1	Reduced activity, association with	17:41196409	113705	NA	NA	22	37	15	52	32	60		BRCA1	Breast and/or ovarian cancer	17.412	113705	5414A>C	NA	64	54	35	8	16	37
BRCA1	Breast cancer	17:41196424	113705	NA	NA	18	41	16	54	29	60		BRCA1	Breast cancer	17.412	113705	5355G>T	NA	29	36	6	34	26	52
BRCA1	Breast cancer	17:41196895	113705	NA	NA	18	41	16	54	29	60		BRCA1	Breast and/or ovarian cancer	17.412	113705	5317A>T	rs80357324	88	82	21	14	34	66
BRCA1	Breast cancer	17:41196977	113705	NA	NA	13	39	12	60	26	59		BRCA1	Breast and/or ovarian cancer	17.412	113705	5293G>T	NA	53	70	72	34	19	99
BRCA1	Breast cancer	17:41197167	113705	NA	NA	11	37	10	48	31	48		BRCA1	Breast and/or ovarian cancer	17.412	113705	5291T>C	rs80357281	51	71	77	37	19	99
BRCA1	Reduced activity, association with	17:41197274	113705	NA	rs8176318	9	37	9	45	29	43		BRCA1	Breast cancer	17.412	113705	5289delG	NA	50	70	75	37	19	102
BRCA1	Breast cancer	17:41197637	113705	NA	NA	8	37	9	45	29	41		BRCA1	Breast and/or ovarian cancer	17.412	113705	5278-1G>C	NA	46	65	74	35	18	95
BRCA1	Prostate cancer	17:41197714	113705	5573T>C	NA	54	86	2	5	30	79		BRCA1	Breast and/or ovarian cancer	17.412	113705	5278-1G>A	rs80358099	46	65	74	35	18	95
BRCA1	Breast and/or ovarian cancer	17:41197728	113705	5559C>G	NA	48	93	3	5	23	80		BRCA1	Breast cancer	17.412	113705	5278-1G>T	rs80358099	46	65	74	35	18	95
BRCA1	Breast cancer	17:41197728	113705	5558dupA	NA	48	93	3	5	23	80		BRCA1	Breast cancer	17.412	113705	5278-2A>T	NA	43	64	68	36	19	93
BRCA1	Breast and/or ovarian cancer	17:41197729	113705	5558A>G	rs80357258	62	130	12	9	21	106		BRCA1	Breast cancer	17.4121	113705	5277+5A>T	NA	167	269	69	45	15	274
BRCA1	Breast and/or ovarian cancer	17:41197739	113705	5548delC	NA	61	126	14	10	23	105		BRCA1	Breast cancer	17.4121	113705	5277+4A>T	NA	169	275	76	45	17	278
BRCA1	Breast and/or ovarian cancer	17:41197746	113705	5541C>A	NA	61	126	14	10	23	105		BRCA1	Ovarian cancer	17.4121	113705	5242G>A	NA	35	51	3	55	24	89
BRCA1	Breast and/or ovarian cancer	17:41197751	113705	5536C>T	rs80356873	68	133	16	11	23	106		BRCA1	Breast cancer	17.4121	113705	5241A>C	NA	41	51	3	53	25	93
BRCA1	Breast and/or ovarian cancer	17:41197765	113705	5522G>A	rs80357368	80	144	23	15	22	110		BRCA1	Breast and/or ovarian cancer	17.4121	113705	5236C>A	rs80357146	41	51	3	54	19	92
BRCA1	Breast cancer	17:41197766	113705	5521delA	rs80357721	83.17	144.67	24	17.67	23.33	116.33		BRCA1	Breast cancer	17.4121	113705	5231delG	NA	41	53	4	56	24	95
BRCA1	Breast cancer	17:41197774	113705	5513T>A	rs80357107	83.75	145.25	24	18.5	24	119		BRCA1	Breast cancer	17.4121	113705	5230delA	NA	45	63	6	65	30	104
BRCA1	Breast cancer	17:41197775	113705	5512delG	NA	89	142	29	17	28	124		BRCA1	Breast cancer	17.4121	113705	5229_5230delAA	rs80357852	45	63	6	65	30	104
BRCA1	Breast cancer	17:41197776	113705	5511G>A	rs80356914	93	149	41	17	28	125		BRCA1	Breast cancer	17.4121	113705	5222T>G	rs80357023	54	75	8	63	32	108
BRCA1	Breast cancer	17:41197777	113705	5510G>A	rs80357307	95	145	39	17	26	122		BRCA1	Breast and/or ovarian cancer	17.4121	113705	5217T>G	rs80357340	65	77	9	62	31	121
BRCA1	Breast and/or ovarian cancer	17:41199683	113705	5444G>A	rs80356962	255	267	16	48	29	136		BRCA1	Breast cancer	17.4122	113705	5173G>T	rs80357291	216	129	47	36	19	128
BRCA1	Breast cancer	17:41199696	113705	5431C>T	NA	166	175	36	26	18	79		BRCA1	Breast and/or ovarian cancer	17.4122	113705	5162delA	NA	216	129	47	36	19	128
BRCA1	Breast and/or ovarian cancer	17:41199698	113705	5429T>G	rs80357451	159	168	39	21	17	75		BRCA1	Breast and/or ovarian cancer	17.4122	113705	5161C>T	NA	225	123	46	41	19	131
BRCA1	Breast cancer	17:41199701	113705	5426T>C	rs80357216	117	125	40	13	17	57		BRCA1	Breast and/or ovarian cancer	17.4122	113705	5154G>A	rs80357239	220	122	46	38	19	128
BRCA1	Breast and/or ovarian cancer	17:41199702	113705	5425G>T	rs28897698	105	114	37	12	14	49		BRCA1	Breast and/or ovarian cancer	17.4122	113705	5152+2dupT	NA	238	114	67	28	11	135
BRCA1	Breast and/or ovarian cancer	17:41199708	113705	5419delA	NA	96	111	35	10	15	46		BRCA1	Breast and/or ovarian cancer	17.4122	113705	5152+3A>C	rs80358124	238	114	67	28	11	135
BRCA1	Breast and/or ovarian cancer	17:41199713	113705	5414A>C	NA	64	76	31	5	16	30		BRCA1	Breast cancer	17.4122	113705	5152+1G>T	rs80358094	244	115	72	28	15	136
BRCA1	Breast cancer	17:41201189	113705	5355G>T	NA	26	46	7	31	26	51		BRCA1	Breast cancer	17.4122	113705	5152+1G>A	NA	244	115	72	28	15	136
BRCA1	Breast and/or ovarian cancer	17:41201205	113705	5339T>C	rs80357474	60	72	17	24	32	48		BRCA1	Breast cancer	17.4122	113705	5152+1G>C	rs80358094	244	115	72	28	15	136
BRCA1	Breast and/or ovarian cancer	17:41201209	113705	5335delC	rs80357590	59	73	17	25	30	46		BRCA1	Breast and/or ovarian cancer	17.4122	113705	5148T>G	NA	253	118	73	30	15	140
BRCA1	Breast cancer	17:41201209	113705	5335C>T	NA	59	73	17	25	30	46		BRCA1	Breast and/or ovarian cancer	17.4122	113705	5145C>A	rs80357094	256	124	71	30	15	136
BRCA1	Breast and/or ovarian cancer	17:41201212	113705	5333-1G>T	NA	60	73	18	24	30	44		BRCA1	Breast and/or ovarian cancer	17.4122	113705	5144G>A	rs45444999	252	120	77	24	12	140
BRCA1	Breast cancer	17:41201212	113705	5333-1G>C	rs80358126	60	73	18	24	30	44		BRCA1	Breast and/or ovarian cancer	17.4122	113705	5143A>T	rs80357222	249	128	91	28	13	156
BRCA1	Breast cancer	17:41201212	113705	5333-1G>A	NA	60	73	18	24	30	44		BRCA1	Breast and/or ovarian cancer	17.4122	113705	5143A>C	rs80357222	249	128	91	28	13	156
BRCA1	Breast and/or ovarian cancer	17:41203095	113705	5317A>T	rs80357324	81	94	20	10	34	61		BRCA1	Breast cancer	17.4122	113705	5138T>C	rs80357132	259	131	91	26	11	156
BRCA1	Breast and/or ovarian cancer	17:41203119	113705	5293G>T	NA	53	100	61	39	19	83		BRCA1	Breast cancer	17.4122	113705	5109T>G	rs80356974	84	67	12	4	20	76
BRCA1	Breast and/or ovarian cancer	17:41203121	113705	5291T>C	rs80357281	49	100	63	40	19	80		BRCA1	Breast and/or ovarian cancer	17.4122	113705	5106delA	rs80357553	75	51	11	5	19	73
BRCA1	Breast cancer	17:41203123	113705	5289delG	NA	48	101	61	39	19	81		BRCA1	Breast and/or ovarian cancer	17.4122	113705	5084_5085delTT	rs80357760	89	50	58	94	16	240
BRCA1	Breast and/or ovarian cancer	17:41203135	113705	5278-1G>C	NA	45	93	61	36	18	76		BRCA1	Breast cancer	17.4122	113705	5085T>A	rs80357387	89	50	58	94	16	240
BRCA1	Breast and/or ovarian cancer	17:41203135	113705	5278-1G>A	rs80358099	45	93	61	36	18	76		BRCA1	Breast and/or ovarian cancer	17.4122	113705	5078_5080delCTG	NA	87	48	55	100	16	232
BRCA1	Breast cancer	17:41203135	113705	5278-1G>T	rs80358099	45	93	61	36	18	76		BRCA1	Breast and/or ovarian cancer	17.4122	113705	5080G>T	rs80356896	87	48	55	100	16	232
BRCA1	Breast cancer	17:41203136	113705	5278-2A>T	NA	40	91	53	37	19	74		BRCA1	Breast cancer	17.4122	113705	5077_5080delGCTGinsTTCATTCTGC	NA	87	48	55	100	16	232
BRCA1	Breast cancer	17:41209064	113705	5277+5A>T	NA	148	372	51	39	15	246		BRCA1	Ovarian cancer	17.4122	113705	5047G>T	rs80356879	39	55	15	40	38	178
BRCA1	Breast cancer	17:41209065	113705	5277+4A>T	NA	149	377	57	39	17	247		BRCA1	Breast cancer	17.4122	113705	5040delT	rs80357673	38	55	12	39	35	169
BRCA1	Ovarian cancer	17:41209104	113705	5242G>A	NA	31	66	3	49	24	73		BRCA1	Breast cancer	17.4122	113705	5035delC	rs80357896	124	83	35	48	16	101
BRCA1	Breast cancer	17:41209105	113705	5241A>C	NA	36	66	3	47	25	77		BRCA1	Breast cancer	17.4122	113705	5030delC	NA	91	89	177	18	32	116
BRCA1	Breast and/or ovarian cancer	17:4120911	113705	5236C>A	rs80357146	36	66	1	48	19	76		BRCA1	Breast and/or ovarian cancer	17.4122	113705	5005G>T	rs80357087	102	98	185	15	40	128
BRCA1	Breast cancer	17:41209115	113705	5231delG	NA	36	68	2	50	24	78		BRCA1	Breast and/or ovarian cancer	17.4122	113705	5005delG	rs80357938	102	98	185	15	40	128
BRCA1	Breast cancer	17:41209116	113705	5230delA	NA	41	85	5	53	30	86		BRCA1	Breast cancer	17.4122	113705	4997A>G	NA	39	52	17	30	21	70
BRCA1	Breast cancer	17:41209116	113705	5229_5230delAA	rs80357852	41	85	5	53	30	86		BRCA1	Breast cancer	17.4122	113705	4996T>C	NA	35	47	14	33	24	69
BRCA1	Breast cancer	17:41209124	113705	5222T>G	rs80357023	49	100	5	52	32	88		BRCA1	Breast and/or ovarian cancer	17.4122	113705	4987-2A>G	NA	37	37	15	44	22	62
BRCA1	Breast and/or ovarian cancer	17:41209129	113705	5217T>G	rs80357340	58	103	6	52	31	102		BRCA1	Breast and/or ovarian cancer	17.4122	113705	4987-3C>G	NA	38	40	18	46	23	66
BRCA1	Breast cancer	17:4121537	113705	5173G>T	rs80357291	191	170	30	42	19	107		BRCA1	Breast cancer	17.4122	113705	4836dupG	NA	48	72	52	30	18	411
BRCA1	Breast and/or ovarian cancer	17:41215381	113705	5162delA	NA	191	170	30	42	19	107		BRCA1	Breast cancer	17.4122	113705	4837A>G	rs1799966	48	72	52	30	18	411
BRCA1	Breast and/or ovarian cancer	17:41215382	113705	5161C>T	NA	197	161	28	41	19	111		BRCA1	Ovarian cancer	17.4122	113705	4837A>T	rs1799966	48	72	52	30	18	411
BRCA1	Breast and/or ovarian cancer	17:41215389	113705	5154G>A	rs80357239	193	159	29	40	19	108		BRCA1	Breast and/or ovarian cancer	17.4122	113705	4837delA	NA	48	72	52	30	18	411
BRCA1	Breast and/or ovarian cancer	17:41215888	113705	5152+2dupT	NA	201	172	46	24	11	119		BRCA1	Breast cancer	17.4122	113705	4836dupG	NA	48	72	52	30	18	411
BRCA1	Breast and/or ovarian cancer	17:41215888	113705	5152+3A>C	rs80358124	201	172	46	24	11	119		BRCA1	Breast cancer	17.4122	113705	4837A>G	rs1799966	48	72	52	30	18	411
BRCA1	Breast cancer	17:4121589	113705	5152+1G>T	rs80358094	207	176	50	24	15	120		BRCA1	Ovarian cancer	17.4122	113705	4837A>T	rs1799966	48	72	52	30	18	411
BRCA1	Breast cancer	17:4121589	113705	5152+1G>A	NA	207	176	50	24	15	120		BRCA1	Breast and/or ovarian cancer	17.4122	113705	4837delA	NA	48	72	52	30	18	411
BRCA1	Breast cancer	17:4121589	113705	5152+1G>C	rs80358094	207	176	50	24	15	120		BRCA1	Breast cancer	17.4122	113705	4836dupG	NA	48	72	52	30	18	411
BRCA1	Breast and/or ovarian cancer	17:41215895	113705	5148T>G	NA	215	173	51	29	15	121		BRCA1	Breast cancer	17.4122	113705	4837A>G	rs1799966	48	72	52	30	18	411
BRCA1	Breast and/or ovarian cancer	17:41215898	113705	5145C>A	rs80357094	220	179	50	29	15	117		BRCA1	Ovarian cancer	17.4122	113705	4837A>T	rs1799966	48	72	52	30	18	411
BRCA1	Breast and/or ovarian cancer	17:41215899	113705	5144G>A	rs45444999	228	178	59	24	12	122		BRCA1	Breast and/or ovarian cancer	17.4122	113705	4837delA	NA	48	72	52	30	18	411
BRCA1	Breast and/or ovarian cancer	17:412159	113705	5143A>T	rs80357222	228	184	64	23	13	136		BRCA1	Breast cancer	17.4122	113705	4836dupG	NA	48	72	52	30	18	411
BRCA1	Breast and/or ovarian cancer	17:412159	113705	5143A>C	rs80357222	228	184	64	23	13	136		BRCA1	Breast cancer	17.4122	113705	4837A>G	rs1799966	48	72	52	30	18	411
BRCA1	Breast cancer	17:41215905	113705	5138T>C	rs80357132	236	186	63	20	11	136		BRCA1	Ovarian cancer	17.4122	113705	4837A>T	rs1799966	48	72	52	30	18	411
BRCA1	Breast cancer	17:41215906	113705	5137delG	rs80357997	216	200	50	19	22	130		BRCA1	Breast and/or ovarian cancer	17.4122	113705	4837delA	NA	48	72	52	30	18	411
BRCA1	Breast and/or ovarian cancer	17:41215917	113705	5126delG	rs80357874	199	198	26	18	22	121		BRCA1	Breast cancer	17.4122	113705	4745delA	rs80357907	35	93	99	17	33	106
BRCA1	Breast and/or ovarian cancer	17:4121592	113705	5123C>T	rs28897696	180	180	18	20	23	117		BRCA1	Breast cancer	17.4122	113705	4743A>C	NA	28	72	86	18	33	89
BRCA1	Breast cancer	17:4121592	113705	5123C>A	rs28897696	180	180	18	20	23	117		BRCA1	Breast cancer	17.4122	113705	4729T>C	rs80356909	47	39	2	30	27	80
BRCA1	Breast cancer	17:41215926	113705	5117G>C	rs80356860	183	184	19	20	23	116		BRCA1	Ovarian cancer	17.4122	113705	4724delC	NA	55	41	7	41	27	89
BRCA1	Breast cancer	17:41215926	113705	5117G>A	rs80356860	183	184	19	20	23	116		BRCA1	Breast cancer	17.4122	113705	4691T>C	rs56119278	62	41	9	42	22	97
BRCA1	Breast cancer	17:41215931	113705	5112delT	NA	148	161	16	19	21	95		BRCA1	Breast cancer	17.4122	113705	4689C>A	NA	72	45.17	10	46.83	20.67	101.83
BRCA1	Breast cancer	17:41215934	113705	5109T>G	rs80356974	80	86	11	13	20	62		BRCA1	Breast cancer	17.4122	113705	4689C>G	rs80357433	72	45.17	10	46.83	20.67	101.83
BRCA1	Breast and/or ovarian cancer	17:41215937	113705	5106delA	rs80357553	68	70	10	13	19	61		BRCA1	Breast cancer	17.4122	113705	4682C>T	rs56158747	77	42	13	52	19	100
BRCA1	Breast and/or ovarian cancer	17:41215958	113705	5084_5085delTT	rs80357760	86	72	61	84	16	212		BRCA1	Breast and/or ovarian cancer	17.4122	113705	4681delA	NA	83	44	13	53	19	107
BRCA1	Breast cancer	17:41215958	113705	5085T>A	rs80357387	86	72	61	84	16	212		BRCA1	Breast cancer	17.4123	113705	4609C>T	rs80357229	96	37	18	66	10	169
BRCA1	Breast and/or ovarian cancer	17:41215963	113705	5078_5080delCTG	NA	80	68	60	82	16	204		BRCA1	Breast and/or ovarian cancer	17.4123	113705	4603G>T	rs80357366	71	35	8	61	16	121
BRCA1	Breast and/or ovarian cancer	17:41215963	113705	5080G>T	rs80356896	80	68	60	82	16	204		BRCA1	Breast cancer	17.4123	113705	4258C>T	rs80357305	68	52	40	24	18	63
BRCA1	Breast cancer	17:41215963	113705	5077_5080delGCTGinsTTCATTCTGC	NA	80	68	60	82	16	204		BRCA1	Breast cancer	17.4123	113705	4237G>T	NA	62	46	44	13	20	53
BRCA1	Breast and/or ovarian cancer	17:41219646	113705	5053A>G	rs80356890	48	97	14	59	37	181		BRCA1	Breast and/or ovarian cancer	17.4123	113705	4228G>T	NA	60	45	48	10	15	56
BRCA1	Ovarian cancer	17:41219652	113705	5047G>T	rs80356879	35	81	6	50	38	150		BRCA1	Breast and/or ovarian cancer	17.4123	113705	4222C>T	rs80356989	60	45	48	10	15	56
BRCA1	Breast cancer	17:41219659	113705	5040delT	rs80357673	35	77	8	46	35	145		BRCA1	Breast and/or ovarian cancer	17.4123	113705	4220T>C	rs80357492	64.42	52.5	58.42	8.42	22.17	52.25
BRCA1	Breast cancer	17:41219664	113705	5035delC	rs80357896	108	112	29	47	16	79		BRCA1	Breast and/or ovarian cancer	17.4123	113705	4201C>T	NA	74	64	67	8	26	58
BRCA1	Breast and/or ovarian cancer	17:41219694	113705	5005G>T	rs80357087	97	123	176	14	40	121		BRCA1	Breast and/or ovarian cancer	17.4123	113705	4198A>G	rs80357306	75	83	78	8	36	68
BRCA1	Breast and/or ovarian cancer	17:41219694	113705	5005delG	rs80357938	97	123	176	14	40	121		BRCA1	Breast cancer	17.4123	113705	4186C>T	rs80357011	83.15	85.54	75.54	8.54	33.23	67.77
BRCA1	Breast cancer	17:41219701	113705	4998C>A	NA	95	120	124	15	30	112		BRCA1	Breast cancer	17.4123	113705	4186-1G>A	NA	82	83	78	9	32	70
BRCA1	Breast cancer	17:41219702	113705	4997A>G	NA	31	69	11	30	21	63		BRCA1	Breast cancer	17.4123	113705	4186-10G>A	rs80358172	82	85	77	9	31	64
BRCA1	Breast cancer	17:41219703	113705	4996T>C	NA	29	65	10	33	24	66		BRCA1	Breast cancer	17.4124	113705	4185+3A>G	NA	82	90	75	9	33	67
BRCA1	Breast and/or ovarian cancer	17:41219714	113705	4987-2A>G	NA	30	58	9	40	22	59		BRCA1	Breast cancer	17.4124	113705	4185_4185+3delGGTA	NA	82	90	75	9	33	67
BRCA1	Breast and/or ovarian cancer	17:41219715	113705	4987-3C>G	NA	31	63	10	42	23	64		BRCA1	Breast cancer	17.4124	113705	4185+1G>T	rs80358076	82	90	75	9	33	67
BRCA1	Breast cancer	17:41223028	113705	4903G>T	NA	15	65	24	47	27	430		BRCA1	Breast and/or ovarian cancer	17.4124	113705	4183_4185delCAG	NA	82	89	74	9	33	69
BRCA1	Breast cancer	17:41223094	113705	4836dupG	NA	47	102	54	31	18	366		BRCA1	Breast cancer	17.4124	113705	4185G>A	rs80356857	82	89	74	9	33	69
BRCA1	Breast cancer	17:41223094	113705	4837A>G	rs1799966	47	102	54	31	18	366		BRCA1	Breast cancer	17.4124	113705	4183C>T	rs80357260	81	93	72	8	26	71
BRCA1	Ovarian cancer	17:41223094	113705	4837A>T	rs1799966	47	102	54	31	18	366		BRCA1	Breast cancer	17.4124	113705	4172T>C	NA	84	104	68	10	26	72
BRCA1	Breast and/or ovarian cancer	17:41223094	113705	4837delA	NA	47	102	54	31	18	366		BRCA1	Breast and/or ovarian cancer	17.4124	113705	4165_4166dupAG	NA	83	104.57	69	10.43	26.14	75.57
BRCA1	Breast cancer	17:41223094	113705	4836dupG	NA	47	102	54	31	18	366		BRCA1	Breast and/or ovarian cancer	17.4124	113705	4167delT	NA	83	104.57	69	10.43	26.14	75.57
BRCA1	Breast cancer	17:41223094	113705	4837A>G	rs1799966	47	102	54	31	18	366		BRCA1	Breast cancer	17.4124	113705	4165_4166delAG	rs80357572	83.75	105.25	66.75	11	26	76.75
BRCA1	Ovarian cancer	17:41223094	113705	4837A>T	rs1799966	47	102	54	31	18	366		BRCA1	Breast cancer	17.4124	113705	4166G>A	rs78951648	83.75	105.25	66.75	11	26	76.75
BRCA1	Breast and/or ovarian cancer	17:41223094	113705	4837delA	NA	47	102	54	31	18	366		BRCA1	Breast cancer	17.4124	113705	4129delA	NA	90.43	120.86	62.14	11.86	25.43	83.57
BRCA1	Breast cancer	17:41223094	113705	4836dupG	NA	47	102	54	31	18	366		BRCA1	Ovarian cancer	17.4124	113705	4117G>T	rs80357259	91.67	124.33	61.67	12.33	24.33	84
BRCA1	Breast cancer	17:41223094	113705	4837A>G	rs1799966	47	102	54	31	18	366		BRCA1	Breast cancer	17.4124	113705	4116T>A	NA	85.25	128.5	56.75	13.25	20.25	83
BRCA1	Ovarian cancer	17:41223094	113705	4837A>T	rs1799966	47	102	54	31	18	366		BRCA1	Breast and/or ovarian cancer	17.4124	113705	4097-1G>A	rs80358070	85	127.67	53	13.33	22.33	83.33
BRCA1	Breast and/or ovarian cancer	17:41223094	113705	4837delA	NA	47	102	54	31	18	366		BRCA1	Breast cancer	17.4124	113705	4097-2A>G	rs80358019	86	126	53	14	21	84
BRCA1	Breast cancer	17:41223094	113705	4836dupG	NA	47	102	54	31	18	366		BRCA1	Breast and/or ovarian cancer	17.4124	113705	4096+3A>G	NA	80.8	118.6	48.4	8.6	25.4	80
BRCA1	Breast cancer	17:41223094	113705	4837A>G	rs1799966	47	102	54	31	18	366		BRCA1	Breast and/or ovarian cancer	17.4124	113705	4096+1G>A	rs80358178	83	115	51	9	26	78
BRCA1	Ovarian cancer	17:41223094	113705	4837A>T	rs1799966	47	102	54	31	18	366		BRCA1	Breast cancer	17.4124	113705	4094delT	NA	78.54	121.85	47.38	7.15	24.77	82
BRCA1	Breast and/or ovarian cancer	17:41223094	113705	4837delA	NA	47	102	54	31	18	366		BRCA1	Breast cancer	17.4124	113705	4088C>G	NA	77	121	47	7	24	84
BRCA1	Breast cancer	17:41223115	113705	4816A>G	rs80356943	45	112	88	14	27	144		BRCA1	Breast cancer	17.4124	113705	3794delA	rs80357767	64	115	189	32	18	108
BRCA1	Breast cancer	17:41223121	113705	4810C>T	rs80357352	43	118	100	19	29	129		BRCA1	Breast cancer	17.4124	113705	3448C>T	rs80357272	13	86	115	36	29	100
BRCA1	Breast and/or ovarian cancer	17:41223167	113705	4764delT	NA	36	121	106	18	35	108		BRCA1	Breast and/or ovarian cancer	17.4124	113705	3442delG	rs80357808	14	91	124	36	32	104
BRCA1	Breast cancer	17:41223171	113705	4760C>G	NA	37	125	101	17	35	105		BRCA1	Breast and/or ovarian cancer	17.4124	113705	3430C>T	rs80357369	16.8	85.6	144.6	36.6	32.6	104.2
BRCA1	Breast cancer	17:41223186	113705	4745delA	rs80357907	34	124	94	17	33	92		BRCA1	Breast and/or ovarian cancer	17.4124	113705	3428delCinsTA	NA	16	84	148	36	33	106
BRCA1	Breast cancer	17:41223188	113705	4743A>C	NA	28	111	71	16	33	78		BRCA1	Breast cancer	17.4124	113705	3426A>G	rs80356843	17	86	135	37	29	103
BRCA1	Breast cancer	17:41223202	113705	4729T>C	rs80356909	39	60	7	28	27	73		BRCA1	Breast cancer	17.4124	113705	3424delG	NA	19.46	76.31	163.31	38.69	33.46	106.38
BRCA1	Ovarian cancer	17:41223207	113705	4724delC	NA	43	66	17	37	27	80		BRCA1	Breast cancer	17.4124	113705	3326_3329delAAAA	rs80357575	65	97	154	11	28	134
BRCA1	Breast cancer	17:41223249	113705	4682C>T	rs56158747	62	76	25	47	19	88		BRCA1	Breast cancer	17.4124	113705	3329delA	NA	65	97	154	11	28	134
BRCA1	Breast and/or ovarian cancer	17:4122325	113705	4681delA	NA	70	79	26	47	19	94		BRCA1	Breast cancer	17.4124	113705	3319G>T	rs80357106	67	104	156	11	31	139
BRCA1	Breast cancer	17:41226414	113705	4609C>T	rs80357229	77	59	23	61	10	146		BRCA1	Breast and/or ovarian cancer	17.4124	113705	3314delA	NA	70	107	161	11	30	138
BRCA1	Breast and/or ovarian cancer	17:4122642	113705	4603G>T	rs80357366	62	56	11	60	16	107		BRCA1	Breast cancer	17.4124	113705	3296C>T	rs80357201	75	107	159	11	33	141
BRCA1	Breast cancer	17:41234517	113705	4261C>T	rs80357013	62	56	36	19	22	51		BRCA1	Breast cancer	17.4124	113705	3296delC	rs80357815	75	107	159	11	33	141
BRCA1	Breast cancer	17:4123452	113705	4258C>T	rs80357305	58	58	33	18	18	48		BRCA1	Breast and/or ovarian cancer	17.4124	113705	3289delA	NA	80	114	169	8	28	142
BRCA1	Breast cancer	17:41234525	113705	4253T>G	NA	57	58	33	19	23	52		BRCA1	Breast and/or ovarian cancer	17.4124	113705	3288_3289delAA	rs80357686	80	114	169	8	28	142
BRCA1	Breast cancer	17:41234535	113705	4242_4243insT	NA	57	53	33	17	23	47		BRCA1	Breast and colorectal cancer	17.4124	113705	3286delC	rs80357533	82	115	172	10	28	146
BRCA1	Breast and/or ovarian cancer	17:41234535	113705	4243delG	rs80357981	57	53	33	17	23	47		BRCA1	Ovarian cancer	17.4124	113705	3286C>T	rs80357485	82	115	172	10	28	146
BRCA1	Breast cancer	17:41234541	113705	4237G>T	NA	52	56	33	7	20	45		BRCA1	Breast and/or ovarian cancer	17.4124	113705	3285delA	NA	83	113	180	10	28	147
BRCA1	Breast and/or ovarian cancer	17:4123455	113705	4228G>T	NA	49	56	37	6	15	47		BRCA1	Breast cancer	17.4124	113705	3279delC	NA	86	116	177	12	29	151
BRCA1	Breast and/or ovarian cancer	17:41234556	113705	4222C>T	rs80356989	49	56	37	6	15	47		BRCA1	Breast cancer	17.4124	113705	3268C>T	rs80357402	91	122	192	13	26	152
BRCA1	Breast and/or ovarian cancer	17:41234558	113705	4220T>C	rs80357492	54.33	70.25	50	4.83	22.17	45.17		BRCA1	Breast cancer	17.4124	113705	3266delT	NA	93	123	189	12	24	157
BRCA1	Breast and/or ovarian cancer	17:41234577	113705	4201C>T	NA	67	84	56	7	26	49		BRCA1	Breast cancer	17.4124	113705	3262delG	NA	115.33	153.33	239.33	16.33	32.33	184.67
BRCA1	Breast and/or ovarian cancer	17:4123458	113705	4198A>G	rs80357306	70	108	65	7	36	57		BRCA1	Breast cancer	17.4124	113705	3257T>G	rs80357006	118	162	242	19	33	194
BRCA1	Breast cancer	17:41234592	113705	4186C>T	rs80357011	76.23	112.23	63.15	8.08	33.23	57.54		BRCA1	Breast and/or ovarian cancer	17.4124	113705	3228A>T	NA	133.75	202.38	277.62	19.38	33.5	218.38
BRCA1	Breast cancer	17:41234593	113705	4186-1G>A	NA	75	112	64	8	32	60		BRCA1	Breast cancer	17.4124	113705	3214delC	rs80357923	134	205	281	19	35	219
BRCA1	Breast cancer	17:41234602	113705	4186-10G>A	rs80358172	74	111	62	7	31	55		BRCA1	Breast and/or ovarian cancer	17.4124	113705	3183delA	NA	139.33	206.33	295.33	17.67	38.33	227.33
BRCA1	Breast cancer	17:41242958	113705	4185+3A>G	NA	74	115	61	7	33	56		BRCA1	Breast and/or ovarian cancer	17.4124	113705	3181delA	rs80357702	132	221	297	16	42	221
BRCA1	Breast cancer	17:41242958	113705	4185_4185+3delGGTA	NA	74	115	61	7	33	56		BRCA1	Breast and/or ovarian cancer	17.4124	113705	3178G>T	rs80357424	132	218	288	18	39	222
BRCA1	Breast cancer	17:4124296	113705	4185+1G>T	rs80358076	74	115	61	7	33	56		BRCA1	Ovarian cancer	17.4124	113705	3168delC	NA	135	219	291	17	41	221
BRCA1	Breast and/or ovarian cancer	17:41242961	113705	4183_4185delCAG	NA	75	115	60	7	33	58		BRCA1	Breast and/or ovarian cancer	17.4124	113705	3164delG	NA	132	229	274	18	40	225
BRCA1	Breast cancer	17:41242961	113705	4185G>A	rs80356857	75	115	60	7	33	58		BRCA1	Ovarian cancer	17.4124	113705	3157delG	NA	127	228	274	19	37	222
BRCA1	Breast cancer	17:41242963	113705	4183C>T	rs80357260	72	121	62	6	26	56		BRCA1	Breast cancer	17.4124	113705	3155delA	NA	126	230	273	18	38	225
BRCA1	Breast cancer	17:41242974	113705	4172T>C	NA	77	132	60	10	26	59		BRCA1	Breast and/or ovarian cancer	17.4124	113705	3152C>G	NA	126	226	276	18	38	220
BRCA1	Breast and/or ovarian cancer	17:41242979	113705	4165_4166dupAG	NA	74.71	131.86	59.29	9.57	26.14	63.57		BRCA1	Breast cancer	17.4124	113705	3145delT	NA	124	227	273	18	38	222
BRCA1	Breast and/or ovarian cancer	17:41242979	113705	4167delT	NA	74.71	131.86	59.29	9.57	26.14	63.57		BRCA1	Breast cancer	17.4124	113705	3143delG	NA	121	224	252	13	39	214
BRCA1	Breast cancer	17:4124298	113705	4165_4166delAG	rs80357572	75.25	132.25	58.75	9.5	26	64.75		BRCA1	Breast cancer	17.4124	113705	3140T>C	NA	119	223	248	14	40	215
BRCA1	Breast cancer	17:4124298	113705	4166G>A	rs78951648	75.25	132.25	58.75	9.5	26	64.75		BRCA1	Breast cancer	17.4124	113705	3122C>G	NA	112	220	248	14	39	215
BRCA1	Breast cancer	17:41243017	113705	4129delA	NA	82.43	155.14	53.43	11	25.43	70.14		BRCA1	Breast cancer	17.4124	113705	3119G>A	rs4986852	111	217	242	14	37	203
BRCA1	Ovarian cancer	17:41243029	113705	4117G>T	rs80357259	82.67	158	53.33	12.33	24.33	70.67		BRCA1	Endometriosis, association with	17.4124	113705	3113A>G	rs16941	111	213	238	14	38	197
BRCA1	Breast cancer	17:4124303	113705	4116T>A	NA	75.5	163	49.5	12.75	20.25	70.5		BRCA1	Breast and/or ovarian cancer	17.4124	113705	3107_3112delTTAAAG	rs80357920	111	210	238	12	34	194
BRCA1	Breast and/or ovarian cancer	17:4124305	113705	4097-1G>A	rs80358070	73.67	163.67	44.67	13.67	22.33	69.67		BRCA1	Breast and/or ovarian cancer	17.4124	113705	3112G>T	rs80357161	111	210	238	12	34	194
BRCA1	Breast cancer	17:41243051	113705	4097-2A>G	rs80358019	75	163	44	14	21	70		BRCA1	Breast cancer	17.4124	113705	3108delT	rs80357841	109	207	240	11	34	194
BRCA1	Breast and/or ovarian cancer	17:41243449	113705	4096+3A>G	NA	70	153.2	41.2	9.8	25.4	66.4		BRCA1	Breast cancer	17.4124	113705	2814delA	NA	128	138	167	30	19	91
BRCA1	Breast and/or ovarian cancer	17:41243451	113705	4096+1G>A	rs80358178	72	150	42	10	26	65		BRCA1	Breast and/or ovarian cancer	17.4124	113705	2762delA	rs80357703	110	114	129	26	19	81
BRCA1	Breast cancer	17:41243454	113705	4094delT	NA	67	153.92	41.69	9.62	24.77	71.38		BRCA1	Breast and/or ovarian cancer	17.4124	113705	2761C>T	rs80357377	106	111	115	24	18	81
BRCA1	Breast cancer	17:4124346	113705	4088C>G	NA	65	152	42	10	24	75		BRCA1	Breast and/or ovarian cancer	17.4124	113705	2752A>C	NA	111	109	128	26	19	81
BRCA1	Breast cancer	17:41243754	113705	3794delA	rs80357767	61	148	167	30	18	91		BRCA1	Breast cancer	17.4125	113705	2263G>T	rs41286296	76	95	67	13	25	131
BRCA1	Breast cancer	17:412441	113705	3448C>T	rs80357272	12	100	107	42	29	94		BRCA1	Breast and/or ovarian cancer	17.4125	113705	2241delC	rs80357650	71	65	42	7	20	118
BRCA1	Breast and/or ovarian cancer	17:41244106	113705	3442delG	rs80357808	13	103	119	42	32	93		BRCA1	Breast cancer	17.4125	113705	1823delA	NA	0	155	148	329	33	141
BRCA1	Breast and/or ovarian cancer	17:41244118	113705	3430C>T	rs80357369	15.8	98.2	142.4	41.8	32.6	98.2		BRCA1	Ovarian cancer	17.4125	113705	1819A>T	rs80357220	0	198	178	374	34	186
BRCA1	Breast and/or ovarian cancer	17:4124412	113705	3428delCinsTA	NA	15	97	143	41	33	99		BRCA1	Breast cancer	17.4125	113705	1817delC	NA	0	197	173	373	34	182
BRCA1	Breast cancer	17:41244122	113705	3426A>G	rs80356843	16	98	135	43	29	98		BRCA1	Breast and/or ovarian cancer	17.4125	113705	1808C>G	NA	0	202	196	379	32	188
BRCA1	Breast cancer	17:41244124	113705	3424delG	NA	18.46	87.77	155	43.69	33.46	99.85		BRCA1	Breast cancer	17.4125	113705	1805delA	NA	0	198	212	392	33	197
BRCA1	Breast cancer	17:41244219	113705	3326_3329delAAAA	rs80357575	57	131	134	14	28	105		BRCA1	Breast and/or ovarian cancer	17.4125	113705	1793T>G	rs80357118	0	203	221	397	31	198
BRCA1	Breast cancer	17:41244219	113705	3329delA	NA	57	131	134	14	28	105		BRCA1	Ovarian cancer	17.4125	113705	1793T>A	rs80357118	0	203	221	397	31	198
BRCA1	Breast cancer	17:41244229	113705	3319G>T	rs80357106	60	137	132	14	31	112		BRCA1	Breast cancer	17.4125	113705	1757delC	rs80357723	0	207	221	403.33	33	203
BRCA1	Breast and/or ovarian cancer	17:41244234	113705	3314delA	NA	60	140	135	13	30	113		BRCA1	Ovarian cancer	17.4125	113705	1747A>T	rs80356928	0	208	221	417	32	203
BRCA1	Breast cancer	17:41244252	113705	3296C>T	rs80357201	66	141	133	13	33	114		BRCA1	Breast cancer	17.4125	113705	1744A>G	NA	0	206	227	413	35	200
BRCA1	Breast cancer	17:41244252	113705	3296delC	rs80357815	66	141	133	13	33	114		BRCA1	Breast cancer	17.4125	113705	1741A>T	NA	0	207	266	404	36	199
BRCA1	Breast and/or ovarian cancer	17:41244259	113705	3289delA	NA	69	148	140	8	28	112		BRCA1	Breast and/or ovarian cancer	17.4125	113705	1729G>T	NA	0	202	284	393	32	205
BRCA1	Breast and/or ovarian cancer	17:41244259	113705	3288_3289delAA	rs80357686	69	148	140	8	28	112		BRCA1	Breast and/or ovarian cancer	17.4125	113705	1723G>A	NA	0	196	309	402	32	205
BRCA1	Breast and colorectal cancer	17:41244262	113705	3286delC	rs80357533	70	152	145	11	28	114		BRCA1	Breast cancer	17.4125	113705	1716delA	NA	0	201.63	345	383.47	30.84	205.11
BRCA1	Ovarian cancer	17:41244262	113705	3286C>T	rs80357485	70	152	145	11	28	114		BRCA1	Breast cancer	17.4125	113705	1714G>T	NA	0	205	339	376	30	207
BRCA1	Breast and/or ovarian cancer	17:41244263	113705	3285delA	NA	73	151	153	10	28	119		BRCA1	Ovarian cancer	17.4125	113705	1700delA	NA	0	200	355	382	29	204
BRCA1	Breast cancer	17:41244269	113705	3279delC	NA	76	156	157	12	29	122		BRCA1	Breast cancer	17.4125	113705	1694delA	NA	0	195	351	370	29	201
BRCA1	Breast cancer	17:4124428	113705	3268C>T	rs80357402	81	166	164	15	26	123		BRCA1	Breast and/or ovarian cancer	17.4125	113705	1690A>C	NA	0	172	410	374	29	187
BRCA1	Breast cancer	17:41244282	113705	3266delT	NA	82	170	162	14	24	127		BRCA1	Breast cancer	17.4125	113705	1687C>T	rs80356898	0	176	438	383	26	176
BRCA1	Breast cancer	17:41244286	113705	3262delG	NA	99.67	206.33	215.33	16	32.33	155.67		BRCA1	Breast and/or ovarian cancer	17.4125	113705	1674delA	rs80357600	0	171	430	377	26	166
BRCA1	Breast cancer	17:41244291	113705	3257T>G	rs80357006	102	211	216	19	33	168		BRCA1	Ovarian cancer	17.4125	113705	1673_1674delAA	NA	0	171	430	377	26	166
BRCA1	Breast and/or ovarian cancer	17:4124432	113705	3228A>T	NA	118.62	253.62	256.75	18.62	33.5	193		BRCA1	Breast cancer	17.4125	113705	1669A>G	NA	0	170	454	353	22	166
BRCA1	Breast cancer	17:41244334	113705	3214delC	rs80357923	118	258	259	19	35	194		BRCA1	Breast cancer	17.4125	113705	1660G>T	NA	0	168	456	357	22	166
BRCA1	Breast and/or ovarian cancer	17:41244365	113705	3183delA	NA	121	272.67	273	18.67	38.33	199.67		BRCA1	Breast cancer	17.4125	113705	1655G>T	NA	0	154	485	346	24	159
BRCA1	Breast and/or ovarian cancer	17:41244367	113705	3181delA	rs80357702	113	290	277	17	42	205		BRCA1	Ovarian cancer	17.4125	113705	1649delA	rs80357619	0	144	513	337	25	156
BRCA1	Breast and/or ovarian cancer	17:4124437	113705	3178G>T	rs80357424	113	292	270	19	39	206		BRCA1	Breast cancer	17.4125	113705	1648A>C	rs56012641	0	142	512	326	23	149
BRCA1	Ovarian cancer	17:4124438	113705	3168delC	NA	115	294	272	18	41	201		BRCA1	Breast and/or ovarian cancer	17.4125	113705	1631A>C	NA	0	132.67	508.67	342	21	149.33
BRCA1	Breast and/or ovarian cancer	17:41244384	113705	3164delG	NA	115	301	256	19	40	205		BRCA1	Breast cancer	17.4125	113705	1630C>T	rs80356952	0	132	511	343	21	151
BRCA1	Ovarian cancer	17:41244391	113705	3157delG	NA	112	302	259	19	40	201		BRCA1	Breast cancer	17.4125	113705	1621C>T	rs80356904	0	147	531	392	17	147
BRCA1	Breast cancer	17:41244393	113705	3155delA	NA	108	305	253	19	38	202		BRCA1	Breast and/or ovarian cancer	17.4125	113705	1570delG	NA	37	209	311	183	18	201
BRCA1	Breast and/or ovarian cancer	17:41244396	113705	3152C>G	NA	108	298	252	19	38	198		BRCA1	Breast cancer	17.4125	113705	1568T>G	NA	49	204	339	198	15	210
BRCA1	Breast cancer	17:41244403	113705	3145delT	NA	106	297	247	19	38	198		BRCA1	Breast and/or ovarian cancer	17.4125	113705	1371delA	NA	18	118	198	43	28	103
BRCA1	Breast cancer	17:41244405	113705	3143delG	NA	101	290	231	13	39	193		BRCA1	Ovarian cancer	17.4125	113705	1297delG	rs80357794	16	58	105	19	27	88
BRCA1	Breast cancer	17:41244408	113705	3140T>C	NA	100	290	229	13	40	195		BRCA1	Breast cancer	17.4125	113705	1292delT	NA	8	249	469	253	37	269
BRCA1	Breast cancer	17:41244426	113705	3122C>G	NA	96	275	233	13	39	194		BRCA1	Breast and/or ovarian cancer	17.4125	113705	1292T>G	rs80357346	8	249	469	253	37	269
BRCA1	Breast cancer	17:41244429	113705	3119G>A	rs4986852	96	276	228	12	37	186		BRCA1	Breast and/or ovarian cancer	17.4125	113705	1166delG	rs273897653	70	78	244	16	27	96
BRCA1	Endometriosis, association with	17:41244435	113705	3113A>G	rs16941	95	274	226	12	38	182		BRCA1	Breast cancer	17.4125	113705	1138C>T	NA	37	58	281	115	18	93
BRCA1	Breast and/or ovarian cancer	17:41244436	113705	3107_3112delTTAAAG	rs80357920	94	270	224	12	34	178		BRCA1	Breast and/or ovarian cancer	17.4125	113705	1082C>G	NA	3	62	239	80	37	81
BRCA1	Breast and/or ovarian cancer	17:41244436	113705	3112G>T	rs80357161	94	270	224	12	34	178		BRCA1	Breast cancer	17.4125	113705	1076C>T	NA	3	81	245	85	36	90
BRCA1	Breast cancer	17:4124444	113705	3108delT	rs80357841	92	267	223	11	34	176		BRCA1	Breast cancer	17.4125	113705	1072delC	rs80357836	4	82	235	78	38	91
BRCA1	Breast cancer	17:41244474	113705	3074C>T	NA	39	113	133	19	27	87		BRCA1	Breast and/or ovarian cancer	17.4125	113705	1067A>G	rs1799950	22	20	17	1	19	42
BRCA1	Breast cancer	17:41244476	113705	3072C>G	NA	42	121	135	14	26	89		BRCA1	Breast cancer	17.4125	113705	1067delA	rs80357796	22	20	17	1	19	42
BRCA1	Breast cancer	17:41244702	113705	2846delG	NA	113	159	166	19	24	79		BRCA1	Breast cancer	17.4125	113705	1066C>T	rs80357215	24	20	24	2	16	40
BRCA1	Ovarian cancer	17:41244716	113705	2832T>A	rs80357458	106	157	162	17	20	73		BRCA1	Breast cancer	17.4125	113705	1063A>T	NA	19	20	39	3	10	42
BRCA1	Breast and/or ovarian cancer	17:41244718	113705	2830delT	NA	104	153	156	16	20	73		BRCA1	Breast cancer	17.4125	113705	1058G>A	rs80356908	22	22	54	3	12	50
BRCA1	Breast cancer	17:41244734	113705	2814delA	NA	109	155	158	17	19	74		BRCA1	Ovarian cancer	17.4125	113705	1054G>T	rs80357472	22	22	54	3	12	50
BRCA1	Breast and/or ovarian cancer	17:41244786	113705	2762delA	rs80357703	91	128	111	22	19	62		BRCA1	Breast and/or ovarian cancer	17.4125	113705	1040delT	NA	19	24	61	4	17	52
BRCA1	Breast and/or ovarian cancer	17:41244787	113705	2761C>T	rs80357377	88	126	103	19	18	63		BRCA1	Breast and/or ovarian cancer	17.4125	113705	1039_1040delCT	NA	19	24	61	4	17	52
BRCA1	Breast and/or ovarian cancer	17:41244796	113705	2752A>C	NA	92	125	110	21	19	62		BRCA1	Breast cancer	17.4125	113705	1018delG	rs80357774	20	21	61	3	17	67
BRCA1	Breast cancer	17:41245234	113705	2314delG	rs80357957	94	182	141	19	26	101		BRCA1	Breast cancer	17.4125	113705	1016delA	rs80357618	21	16	49	2	29	106
BRCA1	Breast cancer	17:41245239	113705	2309C>A	rs80357063	89	177	137	18	27	100		BRCA1	Breast cancer	17.4125	113705	1012A>T	NA	21	16	41	2	22	107
BRCA1	Breast and/or ovarian cancer	17:4124524	113705	2308delT	NA	89	178	135	19	30	103		BRCA1	Breast and/or ovarian cancer	17.4125	113705	488delG	NA	13	187	137	132	29	320
BRCA1	Ovarian cancer	17:41245249	113705	2299delA	rs80357786	86	168	137	16	27	104.5		BRCA1	Breast cancer	17.4125	113705	472A>T	NA	17	195	189	150	26	329
BRCA1	Breast cancer	17:41245279	113705	2269delG	rs80357583	85	147	130	13	28	106		BRCA1	Breast cancer	17.4126	113705	168A>T	NA	56	119	308	63	17	79
BRCA1	Breast cancer	17:41245285	113705	2263G>T	rs41286296	62	125	72	6	25	109		BRCA2	Breast and/or ovarian cancer	13.3289	600185	67+1G>A	rs81002796	44	152	7	57	26	158
BRCA1	Breast and/or ovarian cancer	17:41245307	113705	2241delC	rs80357650	64	82	37	4	20	98		BRCA2	Breast and/or ovarian cancer	13.3289	600185	67+1G>T	rs81002796	44	152	7	57	26	158
BRCA1	Breast cancer	17:41245725	113705	1823delA	NA	0	195	154	318	33	128		BRCA2	Breast and/or ovarian cancer	13.3289	600185	67+2T>C	rs81002885	40	131	5	58	25	164
BRCA1	Ovarian cancer	17:41245729	113705	1819A>T	rs80357220	0	259	178	345	34	166		BRCA2	Breast cancer	13.3289	600185	67+2T>A	rs81002885	40	131	5	58	25	164
BRCA1	Breast cancer	17:41245731	113705	1817delC	NA	0	256	175	343	34	164		BRCA2	Breast cancer	13.3289	600185	68-16T>A	NA	41	134	5	57	25	165
BRCA1	Breast and/or ovarian cancer	17:4124574	113705	1808C>G	NA	0	266	206	349	32	167		BRCA2	Breast cancer	13.3289	600185	68-9T>G	NA	37	135	5	53	23	169
BRCA1	Breast cancer	17:41245743	113705	1805delA	NA	0	265	229	363	33	178		BRCA2	Ovarian cancer	13.3289	600185	68-7T>A	rs81002830	33	133	6	43	21	170
BRCA1	Breast and/or ovarian cancer	17:41245755	113705	1793T>G	rs80357118	0	274	233	368	31	176		BRCA2	Breast cancer	13.3289	600185	71T>A	NA	37	140	11	45	22	161
BRCA1	Ovarian cancer	17:41245755	113705	1793T>A	rs80357118	0	274	233	368	31	176		BRCA2	Breast cancer	13.3289	600185	71delT	NA	37	140	11	45	22	161
BRCA1	Breast cancer	17:41245791	113705	1757delC	rs80357723	0	277.33	234.67	382.67	33	182.33		BRCA2	Breast and/or ovarian cancer	13.3289	600185	72A>T	NA	39	139	11	54	22	159
BRCA1	Ovarian cancer	17:41245801	113705	1747A>T	rs80356928	0	278	235	398	32	182		BRCA2	Breast cancer	13.3289	600185	73G>A	rs80358961	47	142	15	72	21	148
BRCA1	Breast cancer	17:41245804	113705	1744A>G	NA	0	275	238	397	35	180		BRCA2	Breast cancer	13.3289	600185	100G>T	rs80358391	97	89	93	93	17	119
BRCA1	Breast cancer	17:41245807	113705	1741A>T	NA	0	270	264	383	36	176		BRCA2	Breast cancer	13.3289	600185	115delG	NA	93	88	105	93	17	117
BRCA1	Breast and/or ovarian cancer	17:41245819	113705	1729G>T	NA	0	264	301	377	33	180		BRCA2	Breast cancer	13.329	600185	572A>G	NA	147	180	278	82	18	160
BRCA1	Breast and/or ovarian cancer	17:41245825	113705	1723G>A	NA	0	267	304	380	32	181		BRCA2	Breast and/or ovarian cancer	13.329	600185	572delAinsCT	NA	147	180	278	82	18	160
BRCA1	Breast cancer	17:41245832	113705	1716delA	NA	0	264.37	340.58	361.58	30.84	180.58		BRCA2	Breast and/or ovarian cancer	13.329	600185	572A>T	NA	147	180	278	82	18	160
BRCA1	Breast cancer	17:41245834	113705	1714G>T	NA	0	269	337	360	30	182		BRCA2	Breast and/or ovarian cancer	13.329	600185	599C>T	NA	151	191	377	89	19	170
BRCA1	Ovarian cancer	17:41245848	113705	1700delA	NA	0	259	355	358	29	179		BRCA2	Breast cancer	13.329	600185	595_599dupGCTAC	NA	151	191	377	89	19	170
BRCA1	Breast cancer	17:41245854	113705	1694delA	NA	0	252	355	348	29	179		BRCA2	Breast cancer	13.329	600185	673_676delACTA	NA	109	201	352	84	16	211
BRCA1	Breast and/or ovarian cancer	17:41245858	113705	1690A>C	NA	0	224	413	344	29	169		BRCA2	Breast cancer	13.329	600185	673A>G	rs80358897	109	201	352	84	16	211
BRCA1	Breast cancer	17:41245861	113705	1687C>T	rs80356898	0	230	440	340	26	160		BRCA2	Breast cancer	13.3291	600185	702delC	NA	115	170	263	84	16	179
BRCA1	Breast and/or ovarian cancer	17:41245874	113705	1674delA	rs80357600	0	222	434	326	26	154		BRCA2	Breast cancer	13.3291	600185	1636delT	NA	155	141	124	95	18	126
BRCA1	Ovarian cancer	17:41245874	113705	1673_1674delAA	NA	0	222	434	326	26	154		BRCA2	Breast and/or ovarian cancer	13.3291	600185	1654delT	rs80359297	166	136	146	96	19	131
BRCA1	Breast cancer	17:41245879	113705	1669A>G	NA	0	224	455	308	22	154		BRCA2	Breast cancer, male	13.3291	600185	1662T>G	rs80358451	171	138	148	97	19	132
BRCA1	Breast cancer	17:41245888	113705	1660G>T	NA	0	225	457	313	22	155		BRCA2	Breast cancer	13.3291	600185	1670_1683delTAATTGATAATGGA	NA	168	142	150	100	17	140
BRCA1	Breast cancer	17:41245893	113705	1655G>T	NA	0	213	480	294	24	149		BRCA2	Breast and/or ovarian cancer	13.3291	600185	1670T>G	rs80358452	168	142	150	100	17	140
BRCA1	Ovarian cancer	17:41245899	113705	1649delA	rs80357619	0	203	498	285	25	146		BRCA2	Breast cancer	13.3291	600185	1763A>G	NA	175	192	220	126	18	189
BRCA1	Breast cancer	17:412459	113705	1648A>C	rs56012641	0	201	502	274	23	140		BRCA2	Breast and/or ovarian cancer	13.3291	600185	1763_1766delATAA	rs80359303	175	192	220	126	18	189
BRCA1	Breast and/or ovarian cancer	17:41245917	113705	1631A>C	NA	0	192.67	505	283.33	21	140		BRCA2	Breast cancer	13.3291	600185	1786G>C	rs56328701	159	186	196	112	19	180
BRCA1	Breast cancer	17:41245918	113705	1630C>T	rs80356952	0	192	511	288	21	141		BRCA2	Breast cancer	13.3291	600185	1804G>A	rs80358466	126	161	172	93	17	160
BRCA1	Breast cancer	17:41245927	113705	1621C>T	rs80356904	0	196	541	329	17	138		BRCA2	Breast and/or ovarian cancer	13.3291	600185	1805delG	NA	124	158	163	89	19	159
BRCA1	Breast and/or ovarian cancer	17:41245978	113705	1570delG	NA	39	283	307	167	18	179		BRCA2	Breast and/or ovarian cancer	13.3291	600185	1832C>A	rs80358474	118	152	158	88	17	154
BRCA1	Breast cancer	17:4124598	113705	1568T>G	NA	52	288	347	183	15	194		BRCA2	Breast cancer	13.3291	600185	1847G>A	NA	94	126	127	76	14	151
BRCA1	Breast and/or ovarian cancer	17:41246177	113705	1371delA	NA	14	164	189	36	28	84		BRCA2	Breast cancer	13.3291	600185	1881delA	NA	82	117	88	71	13	136
BRCA1	Ovarian cancer	17:41246251	113705	1297delG	rs80357794	18	71	93	23	27	77		BRCA2	Poorer survival in prostate cancer patients	13.3291	600185	1889delC	rs80359315	77	118	84	78	16	129
BRCA1	Breast cancer	17:41246256	113705	1292delT	NA	9	303	456	261	37	224		BRCA2	Breast cancer	13.3291	600185	1901delC	NA	70	104	54	72	14	126
BRCA1	Breast and/or ovarian cancer	17:41246256	113705	1292T>G	rs80357346	9	303	456	261	37	224		BRCA2	Breast cancer	13.3291	600185	1929delG	rs80359316	60	102	53	66	15	122
BRCA1	Breast cancer	17:41246331	113705	1217delA	NA	13	155	249	49	29	92		BRCA2	Breast and/or ovarian cancer	13.3291	600185	2748T>A	NA	138	133	78	41	19	153
BRCA1	Breast cancer	17:41246344	113705	1204G>T	rs273897655	19	154	266	55	28	88		BRCA2	Breast and/or ovarian cancer	13.3291	600185	2803G>A	rs28897716	61	112	16	32	25	118
BRCA1	Breast cancer	17:41246344	113705	1204delG	rs80357859	19	154	266	55	28	88		BRCA2	Breast cancer	13.3291	600185	2870delA	NA	73	96	54	40	18	78
BRCA1	Breast and/or ovarian cancer	17:41246382	113705	1166delG	rs273897653	64	115	222	13	27	84		BRCA2	Breast cancer	13.3291	600185	3146delA	rs80359370	112.29	98.57	91.57	28.71	18.43	58.29
BRCA1	Breast cancer	17:4124641	113705	1138C>T	NA	35	84	264	98	18	75		BRCA2	Breast and/or ovarian cancer	13.3291	600185	3158T>G	rs41293477	115	100	100	29	18	58
BRCA1	Breast and/or ovarian cancer	17:41246466	113705	1082C>G	NA	3	72	250	73	37	76		BRCA2	Breast and/or ovarian cancer	13.3291	600185	3195delT	NA	63	95	101	27	19	94
BRCA1	Breast cancer	17:41246472	113705	1076C>T	NA	2	95	250	67	36	80		BRCA2	Breast cancer	13.3291	600185	3195_3198delTAAT	rs80359376	63	95	101	27	19	94
BRCA1	Breast cancer	17:41246476	113705	1072delC	rs80357836	2	104	242	61	38	78		BRCA2	Breast and/or ovarian cancer	13.3291	600185	3235delT	NA	70	160	61	18	28	147
BRCA1	Breast and/or ovarian cancer	17:41246481	113705	1067A>G	rs1799950	20	30	14	3	19	35		BRCA2	Breast and/or ovarian cancer	13.3291	600185	3265C>T	rs80358573	51	179	18	18	29	175
BRCA1	Breast cancer	17:41246481	113705	1067delA	rs80357796	20	30	14	3	19	35		BRCA2	Breast cancer	13.3291	600185	3570delG	rs80359390	191	352	190	168	19	408
BRCA1	Breast cancer	17:41246482	113705	1066C>T	rs80357215	22	29	17	3	16	33		BRCA2	Breast cancer	13.3291	600185	4169delT	rs80359433	36	81	2	26	21	81
BRCA1	Breast cancer	17:41246485	113705	1063A>T	NA	15	32	26	3	10	33		BRCA2	Breast and/or ovarian cancer	13.3291	600185	4171delG	NA	42	84	3	29	21	85
BRCA1	Breast cancer	17:4124649	113705	1058G>A	rs80356908	17	34	38	5	12	40		BRCA2	Promyelocytic leukemia	13.3291	600185	4187A>G	rs55969723	52	89	3	29	20	87
BRCA1	Ovarian cancer	17:41246494	113705	1054G>T	rs80357472	17	34	38	5	12	40		BRCA2	Breast and/or ovarian cancer	13.3291	600185	4188delA	NA	65	104	4	32	18	100
BRCA1	Breast and/or ovarian cancer	17:41246508	113705	1040delT	NA	15	36	47	7	17	43		BRCA2	Breast cancer	13.3291	600185	4222C>T	rs80358663	60	106	3	30	17	104
BRCA1	Breast and/or ovarian cancer	17:41246508	113705	1039_1040delCT	NA	15	36	47	7	17	43		BRCA2	Ovarian cancer	13.3291	600185	4223delA	NA	64	104	4	34	18	106
BRCA1	Breast cancer	17:4124653	113705	1018delG	rs80357774	15	34	49	6	17	54		BRCA2	Breast and/or ovarian cancer	13.3291	600185	4258G>T	rs28897727	128	174	19	52	22	183
BRCA1	Breast cancer	17:41246532	113705	1016delA	rs80357618	16	18	50	5	29	88		BRCA2	Breast cancer	13.3291	600185	4258delG	rs80359436	128	174	19	52	22	183
BRCA1	Breast cancer	17:41246536	113705	1012A>T	NA	16	18	42	5	22	87		BRCA2	Breast cancer	13.3291	600185	5208delA	NA	64	105	151	36	18	133
BRCA1	Breast and/or ovarian cancer	17:41251851	113705	488delG	NA	13	235	124	132	29	261		BRCA2	Breast and/or ovarian cancer	13.3291	600185	5250delC	NA	34	57	86	19	29	101
BRCA1	Breast cancer	17:41251867	113705	472A>T	NA	16	242	185	142	26	270		BRCA2	Breast cancer	13.3291	600185	5624delA	NA	71	48	54	29	15	261
BRCA1	Breast cancer	17:41256138	113705	441+1G>A	NA	18.75	256.25	296.25	149.5	26.75	279		BRCA2	Breast cancer	13.3291	600185	5626G>T	NA	66	47	52	31	17	256
BRCA1	Breast cancer	17:41256139	113705	441G>C	NA	18	258	303	156	25	278		BRCA2	Breast and/or ovarian cancer	13.3291	600185	5734G>T	NA	31	67	17	67	28	95
BRCA1	Breast and/or ovarian cancer	17:41256149	113705	431delA	NA	19	255	290	156	24	272		BRCA2	Ovarian cancer	13.3291	600185	5791C>T	rs80358807	47	60	162	77	18	78
BRCA1	Breast cancer	17:41258517	113705	168A>T	NA	48	132	298	67	17	70		BRCA2	Breast and/or ovarian cancer	13.3291	600185	5946_5949delTGGA	rs80359549	143	101	212	64	19	126
BRCA2	Breast and/or ovarian cancer	13:32890665	600185	67+1G>A	rs81002796	42	187	9	52	26	147		BRCA2	Breast cancer	13.3291	600185	5946delT	rs80359550	143	101	212	64	19	126
BRCA2	Breast and/or ovarian cancer	13:32890665	600185	67+1G>T	rs81002796	42	187	9	52	26	147		BRCA2	Breast and/or ovarian cancer	13.3291	600185	5946_5950delTGGAA	NA	143	101	212	64	19	126
BRCA2	Breast and/or ovarian cancer	13:32890666	600185	67+2T>C	rs81002885	40	171	11	49	25	147		BRCA2	Breast cancer	13.3291	600185	5969A>C	rs148618542	0	115	1	0	30	127
BRCA2	Breast cancer	13:32890666	600185	67+2T>A	rs81002885	40	171	11	49	25	147		BRCA2	Breast and/or ovarian cancer	13.3291	600185	5980C>T	rs80358831	0	2	2	0	30	1
BRCA2	Breast cancer	13:32893198	600185	68-16T>A	NA	40	174	10	49	25	149		BRCA2	Breast and/or ovarian cancer	13.3291	600185	6018T>A	NA	0	0	5	1	42	31
BRCA2	Breast cancer	13:32893205	600185	68-9T>G	NA	36	173	11	47	23	152		BRCA2	Breast cancer	13.3291	600185	6496G>T	NA	0	0	0	0	34	68
BRCA2	Ovarian cancer	13:32893207	600185	68-7T>A	rs81002830	35	169	11	39	21	151		BRCA2	Breast and/or ovarian cancer	13.3294	600185	7908T>A	rs80359016	0	0	0	0	26	163
BRCA2	Breast cancer	13:32893217	600185	71T>A	NA	34	174	16	43	22	144		BRCA2	Prostate cancer	13.3294	600185	8158G>A	NA	15	97	171	55	32	78
BRCA2	Breast cancer	13:32893217	600185	71delT	NA	34	174	16	43	22	144		BRCA2	Breast cancer	13.3294	600185	8162T>G	NA	13	95	176	54	33	78
BRCA2	Breast and/or ovarian cancer	13:32893218	600185	72A>T	NA	36	171	16	51	22	139		BRCA2	Breast cancer	13.3294	600185	8165C>G	rs80359062	13	91	262	49	30	83
BRCA2	Breast cancer	13:32893246	600185	100G>T	rs80358391	78	131	81	78	17	102		BRCA2	Breast cancer	13.3294	600185	8167G>C	rs41293511	14	95	283.75	49.25	30.25	84.25
BRCA2	Breast cancer	13:32893261	600185	115delG	NA	75	130	83	85	17	103		BRCA2	Breast and/or ovarian cancer	13.3294	600185	8168A>G	rs41293513	14	91	323	51	30	85
BRCA2	Breast cancer	13:32900691	600185	572A>G	NA	127	242	278	63	18	133		BRCA2	Breast and/or ovarian cancer	13.3294	600185	8168A>T	NA	14	91	323	51	30	85
BRCA2	Breast and/or ovarian cancer	13:32900691	600185	572delAinsCT	NA	127	242	278	63	18	133		BRCA2	Breast cancer	13.3294	600185	8168A>C	rs41293513	14	91	323	51	30	85
BRCA2	Breast and/or ovarian cancer	13:32900691	600185	572A>T	NA	127	242	278	63	18	133		BRCA2	Breast cancer	13.3294	600185	8175G>A	NA	14	93	342	51	30	85
BRCA2	Breast and/or ovarian cancer	13:32900718	600185	599C>T	NA	133	261	369	65	19	138		BRCA2	Breast and/or ovarian cancer	13.3294	600185	8172_8175dupGTGG	NA	14	93	342	51	30	85
BRCA2	Breast cancer	13:32900718	600185	595_599dupGCTAC	NA	133	261	369	65	19	138		BRCA2	Breast cancer	13.3294	600185	8182G>A	rs28897749	14	98	353	60	30	89
BRCA2	Breast cancer	13:32903621	600185	673_676delACTA	NA	94	253	341	69	16	193		BRCA2	Liver cancer	13.3294	600185	8187G>T	rs80359065	14	99	356	62	30	87
BRCA2	Breast cancer	13:32903621	600185	673A>G	rs80358897	94	253	341	69	16	193		BRCA2	Breast and/or ovarian cancer	13.3294	600185	8191C>T	NA	14	98.44	359	59.78	29.56	87.56
BRCA2	Breast cancer	13:32905076	600185	702delC	NA	97	219	244	61	16	162		BRCA2	Breast and/or ovarian cancer	13.3294	600185	8195T>G	NA	14	101	349	59	30	88
BRCA2	Breast cancer	13:32907251	600185	1636delT	NA	134	180	113	74	18	121		BRCA2	Breast and/or ovarian cancer	13.3294	600185	8207delT	NA	9	97	374	57	27	90
BRCA2	Breast and/or ovarian cancer	13:32907269	600185	1654delT	rs80359297	144	191	127	78	19	124		BRCA2	Fanconi anaemia	13.3294	600185	8219T>A	rs80359070	9	104	373	54	30	90
BRCA2	Breast cancer, male	13:32907277	600185	1662T>G	rs80358451	148	192	132	76	19	125		BRCA2	Breast and/or ovarian cancer	13.3294	600185	8243G>A	rs80359071	9	98	382	53	26	75
BRCA2	Breast cancer	13:32907285	600185	1670_1683delTAATTGATAATGGA	NA	146	194	128	80	17	131		BRCA2	Breast cancer	13.3295	600185	9154C>T	rs45580035	169	190	239	17	30	193
BRCA2	Breast and/or ovarian cancer	13:32907285	600185	1670T>G	rs80358452	146	194	128	80	17	131		BRCA2	Altered splicing	13.3295	600185	9256G>T	rs80359192	155	194	275	19	26	182
BRCA2	Breast cancer	13:32907378	600185	1763A>G	NA	153	240	206	109	18	158		BRCA2	Breast and/or ovarian cancer	13.3297	600185	9401delG	rs80359759	95	135	268	66	19	111
BRCA2	Breast and/or ovarian cancer	13:32907378	600185	1763_1766delATAA	rs80359303	153	240	206	109	18	158		BRCA2	Ovarian cancer	13.3297	600185	9425A>G	rs80359216	98	133	267	59	19	116
BRCA2	Breast cancer	13:32907401	600185	1786G>C	rs56328701	140	224	183	94	19	151		BRCA2	Breast and/or ovarian cancer	13.3297	600185	9430delT	NA	93	126	250	65	18	119
BRCA2	Breast cancer	13:32907419	600185	1804G>A	rs80358466	108	203	155	68	17	141		COL3A1	Ehlers-Danlos syndrome IV	2.18987	120180	3545G>A	rs111505097	131	164	197	13	31	142
BRCA2	Breast and/or ovarian cancer	13:3290742	600185	1805delG	NA	106	204	144	69	19	139		COL3A1	Ehlers-Danlos syndrome IV	2.18987	120180	3554G>T	NA	134	166	199	15	31	147
BRCA2	Breast and/or ovarian cancer	13:32907447	600185	1832C>A	rs80358474	100	192	138	70	17	133		COL3A1	Ehlers-Danlos syndrome IV	2.18987	120180	3554G>A	rs121912917	134	166	199	15	31	147
BRCA2	Breast cancer	13:32907462	600185	1847G>A	NA	80	169	110	61	14	130		COL3A1	Ehlers-Danlos syndrome IV	2.18987	120180	3562G>A	NA	132	169	195	16	36	143
BRCA2	Breast cancer	13:32907496	600185	1881delA	NA	67	148	72	56	13	116		COL3A1	Ehlers-Danlos syndrome IV	2.18987	120180	3563G>A	rs112456072	128	159	176	18	35	142
BRCA2	Poorer survival in prostate cancer patients	13:32907504	600185	1889delC	rs80359315	60	146	58	56	15	111		COL3A1	Ehlers-Danlos syndrome, vascular-type	2.18987	120180	3563G>T	NA	128	159	176	18	35	142
BRCA2	Breast cancer	13:32907516	600185	1901delC	NA	59	136	42	55	14	109		DSP	Cardiomyopathy, arrhythmogenic right ventricular	6.75688	125647	1408A>G	NA	70	200	602	81	19	194
BRCA2	Breast cancer	13:32910421	600185	1929delG	rs80359316	51	133	41	51	15	108		DSP	Cardiomyopathy, arrhythmogenic, left-dominant	6.75695	125647	1520C>T	NA	68	200	594	80	18	195
BRCA2	Ovarian cancer	13:32910779	600185	2287delC	rs80359327	37	46	47	18	29	71		DSP	Carvajal/Naxos syndrome with leukonychia and oligodontia	6.75708	125647	1691C>T	NA	68	195	588	78	16	197
BRCA2	Breast and/or ovarian cancer	13:3291124	600185	2748T>A	NA	122	180	71	35	19	139		DSP	Cardiomyopathy, arrhythmogenic right ventricular	6.75708	125647	1696G>A	rs148147581	70.8	193.2	574.5	80.1	16.3	200.5
BRCA2	Breast and/or ovarian cancer	13:32911295	600185	2803G>A	rs28897716	56	155	14	33	25	108		DSP	Naxos-Carvajal syndrome	6.75717	125647	1748T>C	NA	70	192	584	80	16	199
BRCA2	Breast cancer	13:32911362	600185	2870delA	NA	63	128	41	41	18	71		DSP	Carvajal/Naxos syndrome	6.75717	125647	1790C>T	NA	74	196	575	80	16	203
BRCA2	Breast cancer	13:32911638	600185	3146delA	rs80359370	106.29	122.71	88.14	35.43	18.43	50.71		DSP	Cardiomyopathy, arrhythmogenic right ventricular	6.75718	125647	1873C>T	NA	76	199	572	81	18	204
BRCA2	Breast and/or ovarian cancer	13:3291165	600185	3158T>G	rs41293477	109	127	92	36	18	50		DSP	Arrhythmogenic right ventricular dysplasia/cardiomyopathy	6.75722	125647	1982A>T	NA	79	207	545	74	16	205
BRCA2	Breast and/or ovarian cancer	13:32911687	600185	3195delT	NA	61	128	83	25	19	83		DSP	Skin fragility and woolly hair	6.75722	125647	1990C>T	rs121912995	81	210	515	75	17	207
BRCA2	Breast cancer	13:32911687	600185	3195_3198delTAAT	rs80359376	61	128	83	25	19	83		DSP	Epidermolytic bullous dermatosis with cardiomyopathy	6.75722	125647	2017C>T	NA	81	210	515	75	17	207
BRCA2	Breast and/or ovarian cancer	13:32911727	600185	3235delT	NA	68	204	56	19	28	130		DSP	Cardiomyopathy, arrhythmogenic right ventricular	6.75743	125647	2131-1G>A	NA	81	208	509	71	17	206
BRCA2	Breast and/or ovarian cancer	13:32911757	600185	3265C>T	rs80358573	51	220	20	19	29	149		DSP	Cardiomyopathy, arrhythmogenic right ventricular	6.7575	125647	2422C>T	rs150339369	82	197	491	71	16	206
BRCA2	Breast cancer	13:32911761	600185	3269delT	rs80359381	36	117	17	83	20	103		DSP	Skin fragility and woolly hair	6.7575	125647	2427T>A	rs121912994	84	198	485	69	17	204
BRCA2	Breast cancer	13:32911775	600185	3283C>T	NA	38	123	16	83	21	109		DSP	Cardiomyopathy, dilated	6.75766	125647	2720G>A	NA	90	206	495	70	18	205
BRCA2	Breast cancer	13:32912062	600185	3570delG	rs80359390	167	465	181	136	19	361		DSP	Cardiomyopathy, arrhythmogenic right ventricular	6.75766	125647	2723G>A	rs142494121	89	205	497	69	17	202
BRCA2	Breast cancer	13:32912661	600185	4169delT	rs80359433	29	117	2	26	21	67		DSP	Arrhythmogenic right ventricular dysplasia/cardiomyopathy	6.75772	125647	2815G>A	rs80325569	90	205	481	69	16	199
BRCA2	Breast and/or ovarian cancer	13:32912663	600185	4171delG	NA	33	123	3	29	21	70		DSP	Cardiomyopathy, arrhythmogenic right ventricular	6.75772	125647	2821C>T	NA	90	206	488	69	17	200
BRCA2	Promyelocytic leukemia	13:32912679	600185	4187A>G	rs55969723	42	122	3	32	20	73		DSP	Dysplasia, arrhythmogenic right ventricular	6.75781	125647	2959T>C	NA	87	206	413	65	19	193
BRCA2	Breast and/or ovarian cancer	13:3291268	600185	4188delA	NA	50	133	3	34	18	84		DSP	Cardiomyopathy, arrhythmogenic, left-dominant	6.75788	125647	3045delG	NA	90	205	374	58	19	194
BRCA2	Breast cancer	13:32912714	600185	4222C>T	rs80358663	46	135	3	31	17	89		FBN1	Marfan syndrome	15.487	134797	8599C>T	NA	66	45	80	18	26	47
BRCA2	Ovarian cancer	13:32912715	600185	4223delA	NA	51	135	3	31	18	90		FBN1	Marfan syndrome	15.487	134797	8547T>G	NA	68.9	46.2	83	16.7	29.3	47.2
BRCA2	Fallopian tube carcinoma	13:32912735	600185	4243G>T	NA	113.8	233.6	16.4	45.8	22.8	145.8		FBN1	Marfan syndrome	15.487	134797	8521G>T	NA	66	43	83	16	28	49
BRCA2	Breast and/or ovarian cancer	13:3291275	600185	4258G>T	rs28897727	112	235	16	44	22	144		FBN1	Marfan syndrome, incomplete	15.487	134797	8518A>T	NA	67	47	82	16	29	50
BRCA2	Breast cancer	13:3291275	600185	4258delG	rs80359436	112	235	16	44	22	144		FBN1	Marfan syndrome	15.487	134797	8494A>G	NA	65	41	79	16	26	46
BRCA2	Breast cancer	13:329137	600185	5208delA	NA	52	140	147	26	18	115		FBN1	Marfan syndrome	15.487	134797	8493delC	NA	57	38	62	15	28	45
BRCA2	Breast and/or ovarian cancer	13:32913742	600185	5250delC	NA	28	98	81	19	29	93		FBN1	Marfan syndrome	15.487	134797	8491delA	NA	56	34	67	11	27	43
BRCA2	Breast cancer	13:32914116	600185	5624delA	NA	60	73	46	32	15	223		FBN1	Marfan syndrome	15.487	134797	8422C>T	NA	45	30	52	7	27	49
BRCA2	Breast cancer	13:32914118	600185	5626G>T	NA	56	67	44	32	17	212		FBN1	Marfan syndrome	15.487	134797	8379C>G	NA	27	35	40	1	25	61
BRCA2	Breast and/or ovarian cancer	13:32914226	600185	5734G>T	NA	25	90	18	63	28	89		FBN1	Marfan syndrome	15.487	134797	8378A>G	NA	12	29	29	3	20	58
BRCA2	Ovarian cancer	13:32914283	600185	5791C>T	rs80358807	37	74	136	69	18	70		FBN1	Marfan syndrome	15.487	134797	8377T>C	rs113722038	12	29	29	3	20	58
BRCA2	Breast and/or ovarian cancer	13:32914438	600185	5946_5949delTGGA	rs80359549	118	132	213	60	19	100		FBN1	Marfan syndrome	15.487	134797	8339T>C	NA	12	30	33	3	22	60
BRCA2	Breast cancer	13:32914438	600185	5946delT	rs80359550	118	132	213	60	19	100		FBN1	Marfan syndrome	15.487	134797	8326C>T	rs137854466	11	32	29	3	21	59
BRCA2	Breast and/or ovarian cancer	13:32914438	600185	5946_5950delTGGAA	NA	118	132	213	60	19	100		FBN1	Marfan syndrome	15.487	134797	8320A>T	NA	11	32	29	3	21	59
BRCA2	Breast cancer	13:32914461	600185	5969A>C	rs148618542	0	161	1	0	30	119		FBN1	Marfan syndrome	15.487	134797	8268G>A	rs267606796	12	34	27	3	21	63
BRCA2	Breast and/or ovarian cancer	13:32914472	600185	5980C>T	rs80358831	0	1	0	0	30	1		FBN1	Progeroid facial features & lipodystrophy	15.487	134797	8226+1G>T	NA	10	34	28	4	18	63
BRCA2	Breast and/or ovarian cancer	13:3291451	600185	6018T>A	NA	0	0	3	1	42	24		FBN1	Marfan syndrome	15.487	134797	8224G>T	NA	9	35	30	2	19	64
BRCA2	Breast cancer	13:32914773	600185	6281A>G	NA	19	117	173	65	39	63		FBN1	Marfan syndrome	15.487	134797	8176C>T	rs61746008	10	35	26	2	20	64
BRCA2	Breast cancer	13:32914794	600185	6302delA	NA	17	115	159	62	36	62		FBN1	Marfan syndrome, incomplete	15.487	134797	8153delG	NA	11	34	25	5	17	70
BRCA2	Breast and/or ovarian cancer	13:32914814	600185	6322C>T	rs55794205	18	118	167	65	39	61		FBN1	Ectopia lentis	15.487	134797	8152T>A	NA	11	40	27	5	20	74
BRCA2	Breast cancer	13:32914815	600185	6323G>A	rs35029074	19	119	172	65	36	66		FBN1	Marfan syndrome, incomplete	15.487	134797	8150delA	NA	10.87	45.33	27.4	4.4	21	73.67
BRCA2	Breast and/or ovarian cancer	13:32914986	600185	6494delT	NA	19	113	140	59	35	66		FBN1	Marfan syndrome	15.487	134797	8149G>T	NA	10.07	50.73	26.4	4.07	21.87	76.6
BRCA2	Breast cancer	13:32914988	600185	6496G>T	NA	0	0	0	0	34	62		FBN1	Marfan syndrome	15.487	134797	8123A>G	NA	10	52	27	5	21	74
BRCA2	Breast and/or ovarian cancer	13:32936762	600185	7908T>A	rs80359016	0	0	1	0	26	141		FBN1	Marfan syndrome	15.487	134797	8108delG	NA	10	52	27	5	21	74
BRCA2	Prostate cancer	13:32937497	600185	8158G>A	NA	17	117	158	50	32	67		FBN1	Marfan syndrome	15.487	134797	8096delC	NA	10	52	25	4	23	77
BRCA2	Breast cancer	13:32937501	600185	8162T>G	NA	15	120	163	50	33	65		FBN1	Marfan syndrome	15.487	134797	8081G>A	NA	10	50	23	5	28	79
BRCA2	Breast cancer	13:32937504	600185	8165C>G	rs80359062	15	117	255	47	30	73		FBN1	Marfan syndrome	15.487	134797	8080C>T	NA	10	44	25	5	27	81
BRCA2	Breast cancer	13:32937506	600185	8167G>C	rs41293511	16	118.75	275.75	45.75	30.25	71.25		FBN1	Marfan syndrome	15.487	134797	8057G>T	NA	9	44	25	5	27	78
BRCA2	Breast and/or ovarian cancer	13:32937507	600185	8168A>G	rs41293513	16	113	311	50	30	72		FBN1	Marfan syndrome	15.487	134797	8056T>C	NA	10	47	26	3	30	82
BRCA2	Breast and/or ovarian cancer	13:32937507	600185	8168A>T	NA	16	113	311	50	30	72		FBN1	Marfan syndrome	15.487	134797	8052-2A>G	NA	9	46	26	3	29	82
BRCA2	Breast cancer	13:32937507	600185	8168A>C	rs41293513	16	113	311	50	30	72		FBN1	Marfan syndrome	15.4871	134797	8051+375G>T	NA	9	44	23	3	27	89
BRCA2	Breast cancer	13:32937514	600185	8175G>A	NA	16	114	331	53	30	72		FBN1	Marfan syndrome	15.4871	134797	8051+5G>A	NA	89	138	178	16	19	163
BRCA2	Breast and/or ovarian cancer	13:32937514	600185	8172_8175dupGTGG	NA	16	114	331	53	30	72		FBN1	Marfan syndrome	15.4871	134797	8051+1G>A	NA	100	134	191	15	18	161
BRCA2	Breast cancer	13:32937521	600185	8182G>A	rs28897749	16	121	348	63	30	74		FBN1	Marfan syndrome	15.4871	134797	8038C>T	NA	98	136	175	19	19	164
BRCA2	Liver cancer	13:32937526	600185	8187G>T	rs80359065	16	122	349	65	30	72		FBN1	Marfan syndrome	15.4871	134797	8027delC	NA	104.67	140.83	181	19.17	18.83	167.83
BRCA2	Breast and/or ovarian cancer	13:3293753	600185	8191C>T	NA	16	122.44	356.67	67.22	29.56	73.11		FBN1	Marfan syndrome	15.4871	134797	8003G>A	NA	152	220	220	41	18	241
BRCA2	Breast and/or ovarian cancer	13:32937534	600185	8195T>G	NA	16	125	349	66	30	73		FBN1	Marfan syndrome	15.4871	134797	8002G>T	NA	160	230.6	218.5	43.3	18.5	260.6
BRCA2	Breast and/or ovarian cancer	13:32937546	600185	8207delT	NA	11	117	368	64	27	75		FBN1	Marfan syndrome	15.4871	134797	7886A>G	NA	117	123	130	40	19	122
BRCA2	Fanconi anaemia	13:32937558	600185	8219T>A	rs80359070	11	124	374	61	30	75		FBN1	Marfan syndrome	15.4871	134797	7871A>G	NA	121	109	148	54	19	109
BRCA2	Breast and/or ovarian cancer	13:32937582	600185	8243G>A	rs80359071	9	113	380	61	26	68		FBN1	Marfan syndrome	15.4871	134797	7871A>C	NA	121	109	148	54	19	109
BRCA2	Breast cancer	13:3295418	600185	9154C>T	rs45580035	145	262	215	18	30	179		FBN1	Fibrillinopathy	15.4871	134797	7780delC	NA	86	102	34	73	18	99
BRCA2	Altered splicing	13:32954282	600185	9256G>T	rs80359192	145	256	255	15	26	148		FBN1	Marfan syndrome	15.4871	134797	7774T>A	NA	85	100	38	78	16	97
BRCA2	Breast and/or ovarian cancer	13:32954283	600185	9256+1G>A	rs81002883	144	248	273	18	33	141		FBN1	Marfan syndrome	15.4871	134797	7769G>A	NA	85	94	46	74	14	96
BRCA2	Breast and/or ovarian cancer	13:32968825	600185	9257-1G>C	rs81002889	134	250	271	19	34	136		FBN1	Marfan syndrome, incomplete	15.4871	134797	7660C>T	NA	19	91	38	31	21	79
BRCA2	Breast and/or ovarian cancer	13:32968825	600185	9257-1G>A	NA	134	250	271	19	34	136		FBN1	Marfan syndrome	15.4871	134797	7657C>T	NA	47	86	192	75	19	106
BRCA2	Breast and/or ovarian cancer	13:3296897	600185	9401delG	rs80359759	77	166	254	56	19	92		FBN1	Marfan syndrome	15.4871	134797	7487G>A	NA	74	71	53	49	19	81
BRCA2	Ovarian cancer	13:32968994	600185	9425A>G	rs80359216	80	166	256	52	19	100		FBN1	Marfan syndrome	15.4871	134797	7466G>A	NA	65	65	38	48	19	74
COL3A1	Aortic aneurysm	2:189855069	120180	781G>A	NA	73	68	311	19	34	42		FBN1	Marfan syndrome with intracranial hypertension	15.4871	134797	7454A>T	NA	60	55.6	35.4	45	16.4	63.2
COL3A1	Ehlers-Danlos syndrome IV	2:189873669	120180	3545G>A	rs111505097	113	234	163	13	31	122		FBN1	Marfan syndrome	15.4871	134797	7454-2A>T	NA	61	53	34	45	14	63
COL3A1	Ehlers-Danlos syndrome IV	2:189873678	120180	3554G>T	NA	114	234	163	15	31	128		FBN1	Marfan syndrome	15.4872	134797	7448G>A	NA	56	52	35	45	19	56
COL3A1	Ehlers-Danlos syndrome IV	2:189873678	120180	3554G>A	rs121912917	114	234	163	15	31	128		FBN1	Marfan syndrome, incomplete	15.4873	134797	6616+1G>T	NA	38	75	20	28	14	91
COL3A1	Ehlers-Danlos syndrome IV	2:189873686	120180	3562G>A	NA	111	232	166	15	36	122		FBN1	Marfan syndrome, incomplete	15.4873	134797	6583G>A	NA	41	76	21	35	13	84
COL3A1	Ehlers-Danlos syndrome IV	2:189873687	120180	3563G>A	rs112456072	109	216	156	16	35	121		FBN1	Marfan syndrome	15.4873	134797	6583G>T	NA	41	76	21	35	13	84
COL3A1	Ehlers-Danlos syndrome, vascular-type	2:189873687	120180	3563G>T	NA	109	216	156	16	35	121		FBN1	Marfan syndrome	15.4873	134797	6580G>T	NA	41	74	20	34	11	90
DSG2	Cardiomyopathy, arrhythmogenic right ventricular	18:29101128	125671	445G>T	NA	114	234	239	18	32	137		FBN1	Marfan syndrome	15.4873	134797	6577G>T	NA	40	69	21	32	19	93
DSP	Cardiomyopathy, arrhythmogenic right ventricular	6:7568811	125647	1408A>G	NA	66	256	534	73	19	166		FBN1	Marfan syndrome	15.4873	134797	6565G>T	NA	39	71	19	27	16	94
DSP	Cardiomyopathy, arrhythmogenic, left-dominant	6:7569519	125647	1520C>T	NA	65	257	529	72	18	166		FBN1	Marfan syndrome, incomplete	15.4873	134797	6554T>C	NA	40	62	10	25	22	82
DSP	Carvajal/Naxos syndrome with leukonychia and oligodontia	6:7570786	125647	1691C>T	NA	67	256	526	72	16	167		FBN1	Aortic aneurysm	15.4873	134797	6542G>T	NA	34	62	2	23	21	72
DSP	Cardiomyopathy, arrhythmogenic right ventricular	6:7570791	125647	1696G>A	rs148147581	68.6	255.6	513.2	73.9	16.3	171.6		FBN1	Marfan syndrome	15.4873	134797	6517G>A	NA	93	137	221	38	18	133
DSP	Naxos-Carvajal syndrome	6:7571662	125647	1748T>C	NA	67	256	523	72	16	172		FBN1	Marfan syndrome, incomplete	15.4873	134797	6407T>A	NA	196	174	241	60	19	169
DSP	Carvajal/Naxos syndrome	6:7571704	125647	1790C>T	NA	71	261	511	75	16	175		FBN1	Marfan syndrome	15.4873	134797	6388G>A	NA	189	171	214	59	19	165
DSP	Cardiomyopathy, arrhythmogenic right ventricular	6:7571787	125647	1873C>T	NA	71	260	509	73	18	176		FBN1	Marfan syndrome	15.4873	134797	6381T>A	NA	165	160	190	56	18	147
DSP	Arrhythmogenic right ventricular dysplasia/cardiomyopathy	6:7572153	125647	1982A>T	NA	74	272	484	65	16	178		FBN1	Marfan syndrome	15.4873	134797	6380A>T	NA	153	155	185	59	18	149
DSP	Skin fragility and woolly hair	6:7572161	125647	1990C>T	rs121912995	77	277	455	67	17	180		FBN1	Fibrillinopathy	15.4873	134797	6163+1delG	NA	4	2	9	0	28	176
DSP	Epidermolytic bullous dermatosis with cardiomyopathy	6:7572188	125647	2017C>T	NA	77	277	455	67	17	180		FBN1	Marfan syndrome	15.4873	134797	6161A>C	NA	4	5	12	0	24	152
DSP	Cardiomyopathy, arrhythmogenic right ventricular	6:7574318	125647	2131-1G>A	NA	77	270	451	63	17	182		FBN1	Marfan syndrome	15.4873	134797	6160C>T	NA	4	5	14	0	23	147
DSP	Cardiomyopathy, arrhythmogenic right ventricular	6:7575014	125647	2422C>T	rs150339369	77	265	443	65	16	182		FBN1	Marfan syndrome	15.4873	134797	6159C>A	NA	4	5	14	0	24	143
DSP	Skin fragility and woolly hair	6:7575019	125647	2427T>A	rs121912994	80	264	428	64	17	180		FBN1	Marfan syndrome	15.4873	134797	6158G>T	rs363805	5	6	14	0	20	138
DSP	Cardiomyopathy, dilated	6:7576616	125647	2720G>A	NA	85	268	444	64	18	179		FBN1	Marfan syndrome	15.4873	134797	6115C>G	NA	8	2	14	0	19	126
DSP	Cardiomyopathy, arrhythmogenic right ventricular	6:7576619	125647	2723G>A	rs142494121	84	269	445	64	17	176		FBN1	Marfan syndrome	15.4873	134797	6113G>A	rs363804	7	4	13	0	19	130
DSP	Arrhythmogenic right ventricular dysplasia/cardiomyopathy	6:7577213	125647	2815G>A	rs80325569	86	270	432	64	16	173		FBN1	Marfan syndrome	15.4873	134797	6113G>T	NA	7	4	13	0	19	130
DSP	Cardiomyopathy, arrhythmogenic right ventricular	6:7577219	125647	2821C>T	NA	86	271	435	64	17	174		FBN1	Marfan syndrome	15.4873	134797	6087C>A	NA	6	6	15	0	23	130
DSP	Dysplasia, arrhythmogenic right ventricular	6:7578093	125647	2959T>C	NA	82	274	365	56	19	170		FBN1	Marfan syndrome	15.4873	134797	6068T>C	rs363803	11	9	20	0	23	115
DSP	Cardiomyopathy, arrhythmogenic, left-dominant	6:7578756	125647	3045delG	NA	84	274	338	51	19	171		FBN1	Marfan syndrome	15.4873	134797	6055G>A	NA	12	9	22	0	26	114
FBN1	Marfan syndrome	15:48703204	134797	8599C>T	NA	58	60	89	13	26	43		FBN1	Marfan syndrome	15.4873	134797	6049T>C	NA	14	12	26	0	26	114
FBN1	Marfan syndrome	15:48703256	134797	8547T>G	NA	60.9	62.2	97	11.9	29.3	43.4		FBN1	Marfan syndrome	15.4873	134797	6046G>A	NA	14	13	25	0	24	115
FBN1	Marfan syndrome	15:48703282	134797	8521G>T	NA	57	56	96	12	28	43		FBN1	Marfan syndrome	15.4874	134797	6037+1G>C	NA	13	28	29	3	25	117
FBN1	Marfan syndrome, incomplete	15:48703285	134797	8518A>T	NA	58	59	95	12	29	44		FBN1	Marfan syndrome	15.4874	134797	6037G>T	NA	16	27	30	3	26	129
FBN1	Marfan syndrome	15:48703309	134797	8494A>G	NA	56	54	89	15	26	40		FBN1	Marfan syndrome	15.4874	134797	6031T>G	NA	11	30	29	3	26	129
FBN1	Marfan syndrome	15:4870331	134797	8493delC	NA	52	52	81	15	28	40		FBN1	Marfan syndrome	15.4874	134797	6018delT	NA	13	39	42	3	31	140
FBN1	Marfan syndrome	15:48703312	134797	8491delA	NA	51	47	83	11	27	38		FBN1	Marfan syndrome	15.4874	134797	6009delA	NA	12	42	39	1	30	137
FBN1	Marfan syndrome	15:48703381	134797	8422C>T	NA	42	43	61	10	27	43		FBN1	Marfan syndrome	15.4874	134797	5999G>C	NA	14	41	45	1	31	147
FBN1	Marfan syndrome	15:48703424	134797	8379C>G	NA	25	40	51	2	25	49		FBN1	Marfan syndrome	15.4874	134797	5993G>A	NA	13.58	41.5	43.25	1	29.83	164.17
FBN1	Marfan syndrome	15:48703425	134797	8378A>G	NA	9	37	38	2	20	50		FBN1	Marfan syndrome, incomplete	15.4874	134797	5991delA	NA	12	43	48	1	30	161
FBN1	Marfan syndrome	15:48703426	134797	8377T>C	rs113722038	9	37	38	2	20	50		FBN1	Marfan syndrome	15.4874	134797	5960G>T	NA	13	38	46	1	25	173
FBN1	Marfan syndrome	15:48703464	134797	8339T>C	NA	10	37	37	1	22	52		FBN1	Marfan syndrome	15.4874	134797	5959G>C	NA	15	40	49	1	27	180
FBN1	Marfan syndrome	15:48703477	134797	8326C>T	rs137854466	9	38	34	1	21	51		FBN1	Marfan syndrome	15.4874	134797	5950T>C	NA	21	34	55	1	28	192
FBN1	Marfan syndrome	15:48703483	134797	8320A>T	NA	9	38	34	1	21	51		FBN1	Marfan syndrome	15.4874	134797	5931T>G	NA	28	43	59	0	27	228
FBN1	Marfan syndrome	15:48703535	134797	8268G>A	rs267606796	10	39	32	1	21	55		FBN1	Marfan syndrome	15.4874	134797	5930G>A	NA	38	50	101	2	31	236
FBN1	Progeroid facial features & lipodystrophy	15:48704765	134797	8226+1G>T	NA	8	42	32	3	18	56		FBN1	Marfan syndrome	15.4874	134797	5929T>C	NA	39	55	111	2	28	219
FBN1	Marfan syndrome	15:48704768	134797	8224G>T	NA	7	43	34	2	19	57		FBN1	Marfan syndrome	15.4874	134797	5927A>G	NA	32.5	43	120	5	29.25	133.75
FBN1	Marfan syndrome	15:48704816	134797	8176C>T	rs61746008	8	43	30	2	20	57		FBN1	Marfan syndrome	15.4874	134797	5924_5925dupAT	NA	32	42	118	5	28	132
FBN1	Marfan syndrome, incomplete	15:48704839	134797	8153delG	NA	6	42	29	3	17	64		FBN1	Marfan syndrome	15.4874	134797	5926G>A	NA	32	42	118	5	28	132
FBN1	Ectopia lentis	15:4870484	134797	8152T>A	NA	5	48	30	3	20	67		FBN1	Marfan syndrome	15.4874	134797	5918-1G>C	NA	30	41	125	3	28	119
FBN1	Marfan syndrome, incomplete	15:48704842	134797	8150delA	NA	5.2	56.53	30	2.6	21	68		FBN1	Marfan syndrome	15.4874	134797	5917+6T>C	NA	29	39	121	3	27	119
FBN1	Marfan syndrome	15:48704843	134797	8149G>T	NA	4.87	62.07	29.27	2.2	21.87	70.73		FBN1	Marfan syndrome	15.4874	134797	5917+5G>A	NA	29.38	40.5	119.62	3	26.62	114
FBN1	Marfan syndrome	15:48704869	134797	8123A>G	NA	5	62	27	3	21	69		FBN1	Marfan syndrome	15.4874	134797	5912G>A	NA	29.67	40.44	118.22	3	27	113
FBN1	Marfan syndrome	15:48704884	134797	8108delG	NA	5	62	27	3	21	69		FBN1	Marfan syndrome	15.4874	134797	5898delA	NA	28.29	41.29	118.71	3	26	111.86
FBN1	Marfan syndrome	15:48704896	134797	8096delC	NA	5	64	30	3	23	71		FBN1	Marfan syndrome	15.4874	134797	5873G>A	NA	26	39	117	3	27	110
FBN1	Marfan syndrome	15:48704911	134797	8081G>A	NA	5	64	26	3	28	75		FBN1	Marfan syndrome	15.4874	134797	5866T>C	NA	26	37	116	3	26	116
FBN1	Marfan syndrome	15:48704912	134797	8080C>T	NA	5	60	29	3	27	76		FBN1	Fibrillinopathy	15.4874	134797	5863C>T	rs363807	26	37	111	3	25	120
FBN1	Marfan syndrome	15:48704935	134797	8057G>T	NA	4	59	27	3	27	73		FBN1	Marfan syndrome	15.4874	134797	5861T>G	NA	26	37	111	3	25	120
FBN1	Marfan syndrome	15:48704936	134797	8056T>C	NA	5	64	30	2	30	77		FBN1	Marfan syndrome	15.4874	134797	5836C>T	NA	28	39	92	0	24	126
FBN1	Marfan syndrome	15:48704942	134797	8052-2A>G	NA	4	63	29	3	29	76		FBN1	Fibrillinopathy	15.4874	134797	5826C>A	rs363806	25	37	93	0	26	125
FBN1	Marfan syndrome	15:48707358	134797	8051+375G>T	NA	4	63	30	3	27	80		FBN1	Marfan syndrome	15.4874	134797	5817delG	NA	20	36	81	3	27	117
FBN1	Marfan syndrome	15:48707728	134797	8051+5G>A	NA	81	180	168	15	19	139		FBN1	Marfan syndrome	15.4874	134797	5782T>G	NA	84	247	268	73	19	265
FBN1	Marfan syndrome	15:48707732	134797	8051+1G>A	NA	87	179	167	15	18	137		FBN1	Marfan syndrome	15.4874	134797	5782T>C	NA	84	247	268	73	19	265
FBN1	Marfan syndrome	15:48707746	134797	8038C>T	NA	86	183	150	18	19	142		FBN1	Marfan syndrome	15.4874	134797	5776A>G	NA	80	250	276	73	18	258
FBN1	Marfan syndrome	15:48707757	134797	8027delC	NA	91.5	194.5	156.83	19	18.83	143.5		FBN1	Marfan syndrome	15.4874	134797	5756G>A	NA	78	241.5	271	70.5	16	259
FBN1	Marfan syndrome	15:48707781	134797	8003G>A	NA	133	311	198	40	18	215		FBN1	Marfan syndrome	15.4874	134797	5756G>T	NA	78	241.5	271	70.5	16	259
FBN1	Marfan syndrome	15:48707782	134797	8002G>T	NA	139.5	334.6	193	39.2	18.5	229.6		FBN1	Marfan syndrome	15.4874	134797	5746T>A	NA	77	238	270	70	17	264
FBN1	Marfan syndrome	15:48707818	134797	7966C>T	NA	57	180	101	19	30	139		FBN1	Marfan syndrome	15.4874	134797	5743C>A	NA	77	240	280	69	17	253
FBN1	Marfan syndrome	15:48707848	134797	7936T>C	NA	63	182	101	18	29	134		FBN1	Marfan syndrome	15.4874	134797	5729G>T	NA	72	242	271	66	15	244
FBN1	Marfan syndrome	15:48707858	134797	7926delC	NA	69	183	105	19	27	129		FBN1	Marfan syndrome	15.4874	134797	5726T>C	NA	69	229	267	63	15	235
FBN1	Marfan syndrome	15:48707868	134797	7916A>G	NA	68	179	101	19	26	129		FBN1	Marfan syndrome	15.4874	134797	5726T>G	NA	69	229	267	63	15	235
FBN1	Marfan syndrome	15:48707898	134797	7886A>G	NA	89	175	109	33	19	107		FBN1	Marfan syndrome	15.4874	134797	5723C>T	NA	68	231	263	63	14	233
FBN1	Marfan syndrome	15:48707913	134797	7871A>G	NA	94	145	128	39	19	91		FBN1	Marfan syndrome, incomplete	15.4874	134797	5720A>G	NA	68	204	259	62	14	223
FBN1	Marfan syndrome	15:48707913	134797	7871A>C	NA	94	145	128	39	19	91		FBN1	Marfan syndrome	15.4874	134797	5718delG	NA	21	231	120	6	25	197
FBN1	Marfan syndrome	15:48712879	134797	7819+5G>A	NA	85	95	93	17	25	86		FBN1	Marfan syndrome	15.4874	134797	5713T>C	NA	18	233	112	7	27	201
FBN1	Marfan syndrome	15:48712881	134797	7819+3A>C	NA	83	95	89	17	24	85		FBN1	Marfan syndrome	15.4874	134797	5707G>A	NA	21	237	121	7	26	211
FBN1	Marfan syndrome	15:48712883	134797	7819+1G>A	NA	60	59	72	17	21	81		FBN1	Marfan syndrome	15.4874	134797	5699G>T	NA	22	242	118	7	27	212
FBN1	Fibrillinopathy	15:48712923	134797	7780delC	NA	73	146	36	63	18	79		FBN1	Marfan syndrome	15.4874	134797	5699G>A	NA	22	242	118	7	27	212
FBN1	Marfan syndrome	15:48712929	134797	7774T>A	NA	73	139	39	65	16	78		FBN1	Marfan syndrome	15.4874	134797	5699G>C	NA	22	242	118	7	27	212
FBN1	Marfan syndrome	15:48712934	134797	7769G>A	NA	75	125	40	62	14	79		FBN1	Marfan syndrome, incomplete	15.4874	134797	5693delA	NA	22	241	125	8	27	220
FBN1	Marfan syndrome, incomplete	15:48713794	134797	7660C>T	NA	16	114	41	33	21	65		FBN1	Marfan syndrome	15.4874	134797	5686delG	NA	19	247	111	8	24	228
FBN1	Marfan syndrome	15:48713797	134797	7657C>T	NA	41	111	177	64	19	94		FBN1	Marfan syndrome	15.4874	134797	5684G>A	NA	23	259	121	8	24	234
FBN1	Marfan syndrome	15:48714232	134797	7487G>A	NA	57	93	47	41	19	80		FBN1	Marfan syndrome	15.4874	134797	5683_5684insTT	NA	23	259	121	8	24	234
FBN1	Marfan syndrome	15:48714253	134797	7466G>A	NA	51	91	36	38	19	71		FBN1	Marfan syndrome	15.4874	134797	5683T>C	NA	22	254	114	9	22	225
FBN1	Marfan syndrome with intracranial hypertension	15:48714265	134797	7454A>T	NA	46.8	83.8	33.2	33.6	16.4	59		FBN1	Marfan syndrome	15.4874	134797	5680G>A	NA	21	264	129	8	22	227
FBN1	Marfan syndrome	15:48714267	134797	7454-2A>T	NA	47	81	33	33	14	59		FBN1	Marfan syndrome	15.4874	134797	5679T>A	NA	24	261	129	8	23	222
FBN1	Marfan syndrome	15:48717571	134797	7448G>A	NA	45	80	32	34	19	53		FBN1	Marfan syndrome	15.4874	134797	5672-1G>A	NA	24	260	116	8	19	216
FBN1	Marfan syndrome	15:48726789	134797	6616+2T>A	NA	40	109	15	28	20	83		FBN1	Marfan syndrome	15.4874	134797	5671+2T>G	NA	28	249	115	11	17	214
FBN1	Marfan syndrome, incomplete	15:4872679	134797	6616+1G>T	NA	39	102	10	26	14	82		FBN1	Marfan syndrome	15.4874	134797	5671G>C	rs193922216	25	249	117	11	17	211
FBN1	Marfan syndrome, incomplete	15:48726824	134797	6583G>A	NA	41	100	12	28	13	74		FBN1	Marfan syndrome	15.4874	134797	5666G>T	NA	24	242	117	11	16	209
FBN1	Marfan syndrome	15:48726824	134797	6583G>T	NA	41	100	12	28	13	74		FBN1	Marfan syndrome	15.4874	134797	5666G>C	NA	24	242	117	11	16	209
FBN1	Marfan syndrome	15:48726827	134797	6580G>T	NA	39	97	12	27	11	79		FBN1	Marfan syndrome	15.4874	134797	5660C>T	NA	23.5	244	115.25	10.75	17.75	209.75
FBN1	Marfan syndrome	15:4872683	134797	6577G>T	NA	37	98	11	23	19	81		FBN1	Marfan syndrome	15.4874	134797	5636G>A	NA	24	252	120	11	17	214
FBN1	Marfan syndrome	15:48726842	134797	6565G>T	NA	37	99	10	22	16	83		FBN1	Marfan syndrome	15.4874	134797	5635G>T	NA	22	240	105	11	18	206
FBN1	Marfan syndrome, incomplete	15:48726853	134797	6554T>C	NA	39	98	6	15	22	73		FBN1	Marfan syndrome	15.4874	134797	5627G>A	rs112728248	22	234	113	11	19	208
FBN1	Aortic aneurysm	15:48726865	134797	6542G>T	NA	35	89	4	14	21	64		FBN1	Marfan syndrome	15.4874	134797	5613delC	NA	22	227	113	10	19	202
FBN1	Marfan syndrome	15:4872689	134797	6517G>A	NA	74	166	184	40	18	117		FBN1	Marfan syndrome	15.4874	134797	5602A>C	NA	22	224	107	9	20	199
FBN1	Marfan syndrome, incomplete	15:48729247	134797	6407T>A	NA	161	217	219	60	19	146		FBN1	Marfan syndrome	15.4874	134797	5593T>C	NA	23	221	112	9	20	195
FBN1	Marfan syndrome	15:48729266	134797	6388G>A	NA	159	210	211	57	19	142		FBN1	Marfan syndrome	15.4874	134797	5579G>A	NA	27	209	104	8	19	182
FBN1	Marfan syndrome	15:48729273	134797	6381T>A	NA	143	197	182	49	18	128		FBN1	Marfan syndrome	15.4874	134797	5579G>T	NA	27	209	104	8	19	182
FBN1	Marfan syndrome	15:48729274	134797	6380A>T	NA	133	189	189	54	18	129		FBN1	Marfan syndrome	15.4874	134797	5578T>C	NA	26	212	102	8	19	182
FBN1	Fibrillinopathy	15:48733917	134797	6163+1delG	NA	5	1	4	0	28	158		FBN1	Marfan syndrome	15.4874	134797	5560C>T	NA	28	203	102	12	18	172
FBN1	Marfan syndrome	15:4873392	134797	6161A>C	NA	3	3	5	0	24	136		FBN1	Marfan syndrome	15.4874	134797	5559delT	NA	27	189	108	13	17	168
FBN1	Marfan syndrome	15:48733921	134797	6160C>T	NA	4	3	5	0	23	130		FBN1	Marfan syndrome	15.4874	134797	5546-1G>T	NA	27	183	104	15	17	168
FBN1	Marfan syndrome	15:48733922	134797	6159C>A	NA	4	4	5	0	24	127		FBN1	Marfan syndrome	15.4874	134797	5546-2A>G	NA	25	185	93	15	18	164
FBN1	Marfan syndrome	15:48733923	134797	6158G>T	rs363805	5	5	6	0	20	123		FBN1	Marfan syndrome	15.4874	134797	5546-2A>C	NA	25	185	93	15	18	164
FBN1	Marfan syndrome	15:48733966	134797	6115C>G	NA	6	4	5	0	19	117		FBN1	Marfan syndrome	15.4874	134797	5541C>G	NA	25	187	105	12	17	157
FBN1	Marfan syndrome	15:48733968	134797	6113G>A	rs363804	5	5	4	0	19	116		FBN1	Marfan syndrome	15.4874	134797	5539T>C	NA	25	176	104	13	18	148
FBN1	Marfan syndrome	15:48733968	134797	6113G>T	NA	5	5	4	0	19	116		FBN1	Marfan syndrome	15.4874	134797	5512G>T	NA	26	176	107	14	20	132
FBN1	Marfan syndrome	15:48733994	134797	6087C>A	NA	3	6	6	0	23	116		FBN1	Marfan syndrome	15.4874	134797	5509C>T	NA	26	173	110	16	19	132
FBN1	Marfan syndrome	15:48734013	134797	6068T>C	rs363803	7	13	9	0	23	94		FBN1	Marfan syndrome	15.4874	134797	5504G>T	NA	27	175	104	16	19	128
FBN1	Marfan syndrome	15:48734026	134797	6055G>A	NA	8	13	14	0	26	94		FBN1	Marfan syndrome	15.4874	134797	5504G>A	rs111929350	27	175	104	16	19	128
FBN1	Marfan syndrome	15:48734032	134797	6049T>C	NA	10	18	15	0	26	96		FBN1	Marfan syndrome	15.4874	134797	5498G>C	NA	27	171	92	17	19	120
FBN1	Marfan syndrome	15:48734035	134797	6046G>A	NA	10	19	17	0	24	98		FBN1	Marfan syndrome	15.4874	134797	5497T>C	NA	30	167	92	17	21	122
FBN1	Marfan syndrome	15:48736737	134797	6037+1G>C	NA	11	33	18	3	25	100		FBN1	Marfan syndrome	15.4874	134797	5494C>T	NA	33	169	90	15	23	117
FBN1	Marfan syndrome	15:48736738	134797	6037G>T	NA	13	34	19	3	26	120		FBN1	Marfan syndrome	15.4874	134797	5488A>T	NA	33	164	88	15	24	118
FBN1	Marfan syndrome	15:48736744	134797	6031T>G	NA	8	38	17	3	26	123		FBN1	Marfan syndrome	15.4874	134797	5479A>C	NA	33	159	81	16	22	115
FBN1	Marfan syndrome	15:48736757	134797	6018delT	NA	11	47	25	3	31	131		FBN1	Marfan syndrome	15.4874	134797	5477A>G	NA	32	156	81	16	22	113
FBN1	Marfan syndrome	15:48736766	134797	6009delA	NA	11	48	26	2	30	126		FBN1	Marfan syndrome	15.4874	134797	5471G>A	NA	32	155	75	16	22	113
FBN1	Marfan syndrome	15:48736776	134797	5999G>C	NA	13	48	30	2	31	137		FBN1	Marfan syndrome	15.4874	134797	5467G>T	NA	33	152	76	16	19	118
FBN1	Marfan syndrome	15:48736782	134797	5993G>A	NA	13	49.5	37.25	2	29.83	149.83		FBN1	Marfan syndrome	15.4874	134797	5453G>A	NA	36	150	75	16	20	113
FBN1	Marfan syndrome, incomplete	15:48736784	134797	5991delA	NA	12	51	39	2	30	147		FBN1	Marfan syndrome	15.4874	134797	5452T>G	NA	35	153	70	16	21	115
FBN1	Marfan syndrome	15:48736815	134797	5960G>T	NA	14	48	38	2	25	155		FBN1	Marfan syndrome, incomplete	15.4874	134797	5435G>A	NA	40	139	68	16	24	107
FBN1	Marfan syndrome	15:48736816	134797	5959G>C	NA	17	49	40	2	27	164		FBN1	Marfan syndrome	15.4874	134797	5434T>C	NA	40	139	70	16	23	103
FBN1	Marfan syndrome	15:48736825	134797	5950T>C	NA	20	50	46	1	28	170		FBN1	Marfan syndrome	15.4874	134797	5431G>A	NA	38	135	73	15	22	102
FBN1	Marfan syndrome	15:48736844	134797	5931T>G	NA	26	60	63	0	27	204		FBN1	Marfan syndrome	15.4874	134797	5423-1G>A	NA	38	128	65	17	24	103
FBN1	Marfan syndrome	15:48736845	134797	5930G>A	NA	33	74	107	2	31	208		FBN1	Marfan syndrome	15.4874	134797	5423-1G>T	NA	38	128	65	17	24	103
FBN1	Marfan syndrome	15:48736846	134797	5929T>C	NA	35	77	112	2	28	200		FBN1	Marfan syndrome	15.4875	134797	5377T>C	NA	44	112	58	23	19	94
FBN1	Marfan syndrome	15:48736848	134797	5927A>G	NA	28.5	54.5	110.75	3	29.25	120.75		FBN1	Marfan syndrome	15.4875	134797	5372G>T	NA	46	100	53	17	20	91
FBN1	Marfan syndrome	15:48736849	134797	5924_5925dupAT	NA	27	52	106	3	28	120		FBN1	Marfan syndrome	15.4875	134797	5372G>A	NA	46	100	53	17	20	91
FBN1	Marfan syndrome	15:48736849	134797	5926G>A	NA	27	52	106	3	28	120		FBN1	Marfan syndrome	15.4875	134797	5371T>C	NA	47	93	45	15	25	90
FBN1	Marfan syndrome	15:48736858	134797	5918-1G>C	NA	23	47	118	1	28	112		FBN1	Marfan syndrome	15.4875	134797	5369G>C	NA	48	91	44	14	25	88
FBN1	Marfan syndrome	15:48737567	134797	5917+6T>C	NA	23	45	112	1	27	110		FBN1	Marfan syndrome	15.4875	134797	5368C>T	rs113249837	46	87	44	16	25	85
FBN1	Marfan syndrome	15:48737568	134797	5917+5G>A	NA	25.75	45.88	111.75	1	26.62	105.12		FBN1	Marfan syndrome	15.4875	134797	5345G>A	NA	43	76	44	16	24	88
FBN1	Marfan syndrome	15:48737578	134797	5912G>A	NA	26.11	46	111.22	1	27	103.67		FBN1	Ectopia lentis	15.4875	134797	5344T>C	NA	45	73	44	16	22	86
FBN1	Marfan syndrome	15:48737592	134797	5898delA	NA	24	46.43	114.14	1	26	101.43		FBN1	Marfan syndrome	15.4875	134797	5343G>A	rs140649	44	71	44	16	24	85
FBN1	Marfan syndrome	15:48737617	134797	5873G>A	NA	23	45	111	1	27	98		FBN1	Marfan syndrome	15.4875	134797	5342T>C	NA	43	68	41	17	24	75
FBN1	Marfan syndrome	15:48737624	134797	5866T>C	NA	23	42	110	1	26	101		FBN1	Marfan syndrome	15.4875	134797	5339G>A	NA	42	68	43	16	25	80
FBN1	Fibrillinopathy	15:48737627	134797	5863C>T	rs363807	23	52	107	1	25	99		FBN1	Marfan syndrome	15.4875	134797	5336delA	NA	42	62	42	17	23	79
FBN1	Marfan syndrome	15:48737629	134797	5861T>G	NA	23	52	107	1	25	99		FBN1	Marfan syndrome, incomplete	15.4875	134797	5330G>T	NA	42	62	42	17	23	79
FBN1	Marfan syndrome	15:48737654	134797	5836C>T	NA	21	59	82	0	24	115		FBN1	Marfan syndrome	15.4875	134797	5314G>T	NA	53	91	91	3	19	83
FBN1	Fibrillinopathy	15:48737664	134797	5826C>A	rs363806	18	58	84	0	26	111		FBN1	Marfan syndrome	15.4875	134797	5311delC	NA	60	101	95	4	20	89
FBN1	Marfan syndrome	15:48737673	134797	5817delG	NA	14	54	76	1	27	102		FBN1	Marfan syndrome	15.4875	134797	5309G>T	NA	65	108	92	4	20	99
FBN1	Marfan syndrome	15:48738909	134797	5782T>G	NA	75	316	273	62	19	222		FBN1	Marfan syndrome	15.4875	134797	5309G>A	NA	65	108	92	4	20	99
FBN1	Marfan syndrome	15:48738909	134797	5782T>C	NA	75	316	273	62	19	222		FBN1	Marfan syndrome	15.4875	134797	5305G>A	NA	75	112	101	6	20	101
FBN1	Marfan syndrome	15:48738915	134797	5776A>G	NA	73	317	282	63	18	219		FBN1	Marfan syndrome	15.4875	134797	5297-2A>G	NA	71	105	96	6	28	91
FBN1	Marfan syndrome	15:48738935	134797	5756G>A	NA	71	306.5	279	62	16	221		FBN1	Marfan syndrome	15.4875	134797	5297-2A>C	NA	71	105	96	6	28	91
FBN1	Marfan syndrome	15:48738935	134797	5756G>T	NA	71	306.5	279	62	16	221		FBN1	Geleophysic dysplasia	15.4876	134797	5198G>A	NA	89	203	357	118	19	203
FBN1	Marfan syndrome	15:48738945	134797	5746T>A	NA	70	309	283	60	17	225		FBN1	Acromicric dysplasia	15.4876	134797	5165C>G	NA	0	0	1	0	30	3
FBN1	Marfan syndrome	15:48738948	134797	5743C>A	NA	70	305	290	58	17	215		FBN1	Marfan syndrome	15.4876	134797	5162G>A	NA	205	209	292	56	19	190
FBN1	Marfan syndrome	15:48738962	134797	5729G>T	NA	68	302	286	53	15	205		FBN1	Acromicric dysplasia	15.4876	134797	5099A>G	NA	75	170	374	83	17	168.5
FBN1	Marfan syndrome	15:48738965	134797	5726T>C	NA	66	290	278	51	15	200		FBN1	Marfan syndrome	15.4876	134797	4905delC	NA	61	0	0	78	27	56
FBN1	Marfan syndrome	15:48738965	134797	5726T>G	NA	66	290	278	51	15	200		FBN1	Marfan syndrome	15.4876	134797	4816+1G>T	NA	92	244	564	127	16	218
FBN1	Marfan syndrome	15:48738968	134797	5723C>T	NA	65	294	276	50	14	198		FBN1	Marfan syndrome	15.4876	134797	4813G>A	NA	92	244	564	127	16	218
FBN1	Marfan syndrome, incomplete	15:48738971	134797	5720A>G	NA	63	271	278	50	14	195		FBN1	Marfan syndrome	15.4876	134797	4505G>A	NA	5	41	202	49	31	126
FBN1	Marfan syndrome	15:48738973	134797	5718delG	NA	20	311	113	6	25	174		FBN1	Marfan syndrome	15.4876	134797	4495A>T	NA	6	40	205	49	31	125
FBN1	Marfan syndrome	15:48738978	134797	5713T>C	NA	17	313	106	8	27	177		FBN1	Aortic aneurysm	15.4876	134797	4490G>A	NA	12	56	232	40	26	111
FBN1	Marfan syndrome	15:48738984	134797	5707G>A	NA	19	320	117	8	26	185		FBN1	Marfan syndrome	15.4876	134797	4490G>C	NA	12	56	232	40	26	111
FBN1	Marfan syndrome	15:48738992	134797	5699G>T	NA	20	326	116	8	27	185		FBN1	Marfan syndrome	15.4876	134797	4485delC	NA	12.25	58.75	243.75	35	23.25	117
FBN1	Marfan syndrome	15:48738992	134797	5699G>A	NA	20	326	116	8	27	185		FBN1	Marfan syndrome	15.4876	134797	4474delC	NA	12	58	259	37	26	117
FBN1	Marfan syndrome	15:48738992	134797	5699G>C	NA	20	326	116	8	27	185		FBN1	Marfan syndrome	15.4876	134797	4472G>A	NA	16	61	291	30	26	118
FBN1	Marfan syndrome, incomplete	15:48738998	134797	5693delA	NA	20	330	121	8	27	192		FBN1	Marfan syndrome	15.4876	134797	4472G>T	NA	16	61	291	30	26	118
FBN1	Marfan syndrome	15:48739005	134797	5686delG	NA	19	329	107	8	24	196		FBN1	Marfan syndrome	15.4876	134797	4467T>A	rs193922205	16	65	296	29	27	121
FBN1	Marfan syndrome	15:48739007	134797	5684G>A	NA	22	344	120	8	24	206		FBN1	Marfan syndrome	15.4876	134797	4460A>C	NA	17	63	315	31	24	124
FBN1	Marfan syndrome	15:48739007	134797	5683_5684insTT	NA	22	344	120	8	24	206		FBN1	Marfan syndrome	15.4876	134797	4460-1G>T	NA	17	63	315	31	24	124
FBN1	Marfan syndrome	15:48739008	134797	5683T>C	NA	22	337	114	9	22	197		FBN1	Marfan syndrome	15.4876	134797	4460-8G>A	rs193922204	18	73	284	23	31	125
FBN1	Marfan syndrome	15:48739011	134797	5680G>A	NA	21	347	126	8	22	200		FBN1	Marfan syndrome	15.4876	134797	4459+1G>A	NA	17	70	278	20	29	122
FBN1	Marfan syndrome	15:48739012	134797	5679T>A	NA	24	344	130	8	23	196		FBN1	Marfan syndrome	15.4876	134797	4459G>A	rs113693945	14	49	226	27	31	110
FBN1	Marfan syndrome	15:4873902	134797	5672-1G>A	NA	24	337	115	8	19	191		FBN1	Marfan syndrome	15.4876	134797	4454G>A	NA	15	50	226	29	31	107
FBN1	Marfan syndrome	15:48740963	134797	5671+2T>G	NA	26	328	123	10	17	183		FBN1	Marfan syndrome	15.4877	134797	4120T>G	NA	18	117	470	32	44	116
FBN1	Marfan syndrome	15:48740965	134797	5671G>C	rs193922216	23	326	117	10	17	179		FBN1	Marfan syndrome	15.4877	134797	4099T>C	NA	19	118	468	33	44	115
FBN1	Marfan syndrome	15:4874097	134797	5666G>T	NA	22	318	121	10	16	179		FBN1	Marfan syndrome	15.4877	134797	4096G>T	NA	11	120	466	24	47	120
FBN1	Marfan syndrome	15:4874097	134797	5666G>C	NA	22	318	121	10	16	179		FBN1	Marfan syndrome	15.4877	134797	4096G>A	NA	11	120	466	24	47	120
FBN1	Marfan syndrome	15:48740976	134797	5660C>T	NA	21.62	315.75	117	9.75	17.75	176.88		FBN1	Marfan syndrome	15.4878	134797	3511T>C	NA	28	2	1	0	14	12
FBN1	Marfan syndrome	15:48741	134797	5636G>A	NA	22	325	120	10	17	183		FBN1	Marfan syndrome	15.4878	134797	3509G>A	rs137854475	29	2	1	0	15	12
FBN1	Marfan syndrome	15:48741001	134797	5635G>T	NA	20	311	108	10	18	175		FBN1	Marfan syndrome	15.4878	134797	3503A>G	NA	22	27	65	1	17	26
FBN1	Marfan syndrome	15:48741009	134797	5627G>A	rs112728248	21	309	116	10	19	176		FBN1	Marfan syndrome	15.4878	134797	3497G>A	NA	24	33	87	2	17	24
FBN1	Marfan syndrome	15:48741023	134797	5613delC	NA	22	304	112	9	19	172		FBN1	Marfan syndrome	15.4878	134797	3473A>G	NA	0	3	0	1	34	0
FBN1	Marfan syndrome	15:48741034	134797	5602A>C	NA	22	299	108	8	20	171		FBN1	Marfan syndrome	15.4878	134797	3464A>G	NA	0	0	0	0	19	1
FBN1	Marfan syndrome	15:48741043	134797	5593T>C	NA	23	294	110	9	20	166		FBN1	Marfan syndrome	15.4878	134797	3464-1G>A	NA	11	48	73	1	29	45
FBN1	Marfan syndrome	15:48741057	134797	5579G>A	NA	26	285	108	8	19	157		FBN1	Marfan syndrome	15.4878	134797	3463+1G>A	NA	57	139	195	13	29	168
FBN1	Marfan syndrome	15:48741057	134797	5579G>T	NA	26	285	108	8	19	157		FBN1	Marfan syndrome	15.4878	134797	3458G>A	rs140599	63	131	172	16	35	179
FBN1	Marfan syndrome	15:48741058	134797	5578T>C	NA	25	290	104	8	19	156		FBN1	Marfan syndrome	15.4878	134797	3458G>C	NA	63	131	172	16	35	179
FBN1	Marfan syndrome	15:48741076	134797	5560C>T	NA	27	268	109	8	18	145		FBN1	Marfan syndrome	15.4878	134797	3455C>T	NA	64	127	145	19	26	165
FBN1	Marfan syndrome	15:48741077	134797	5559delT	NA	25	251	110	10	17	142		FBN1	Marfan syndrome	15.4878	134797	3393C>G	NA	27	61	113	39	19	91
FBN1	Marfan syndrome	15:48741091	134797	5546-1G>T	NA	25	248	111	12	17	141		FBN1	Marfan syndrome	15.4878	134797	3391A>T	rs137854473	27	58	95	38	18	82
FBN1	Marfan syndrome	15:48741092	134797	5546-2A>G	NA	23	249	105	12	18	139		FBN1	Marfan syndrome	15.4878	134797	3229T>C	rs140586	51	63	165	95	14	84
FBN1	Marfan syndrome	15:48741092	134797	5546-2A>C	NA	23	249	105	12	18	139		FBN1	Marfan syndrome	15.4878	134797	3221G>A	NA	50	60	160	101	15	81
FBN1	Marfan syndrome	15:48744763	134797	5541C>G	NA	23	248	110	11	17	135		FBN1	Marfan syndrome	15.4878	134797	3220T>C	rs137854465	49	57	164	100	14	70
FBN1	Marfan syndrome	15:48744765	134797	5539T>C	NA	23	235	106	9	18	126		FBN1	Marfan syndrome	15.4878	134797	3219A>T	NA	47	58	164	103	16	67
FBN1	Marfan syndrome	15:48744792	134797	5512G>T	NA	24	233	106	14	20	114		FBN1	Marfan syndrome	15.4878	134797	3215A>G	NA	17	35	115	67	29	48
FBN1	Marfan syndrome	15:48744795	134797	5509C>T	NA	23	226	114	15	19	114		FBN1	Marfan syndrome	15.4878	134797	3173G>A	NA	69	62	64	37	17	63
FBN1	Marfan syndrome	15:487448	134797	5504G>T	NA	24	225	105	15	19	109		FBN1	Marfan syndrome	15.4878	134797	3082G>T	NA	112	80	231	29	19	98
FBN1	Marfan syndrome	15:487448	134797	5504G>A	rs111929350	24	225	105	15	19	109		FBN1	Marfan syndrome	15.4878	134797	3069G>C	NA	113	97	238	27	16	105
FBN1	Marfan syndrome	15:48744806	134797	5498G>C	NA	25	217	97	15	19	101		FBN1	Marfan syndrome	15.4878	134797	3058A>G	rs111801777	145	117	258	33	17	139
FBN1	Marfan syndrome	15:48744807	134797	5497T>C	NA	27	213	97	15	21	104		FBN1	Marfan syndrome	15.4878	134797	3043G>C	NA	146	113	262	38	16	138
FBN1	Marfan syndrome	15:4874481	134797	5494C>T	NA	30	207	92	14	23	100		FBN1	Marfan syndrome	15.4878	134797	3043G>A	rs55831697	146	113	262	38	16	138
FBN1	Marfan syndrome	15:48744816	134797	5488A>T	NA	29	201	87	14	24	101		FBN1	Marfan syndrome	15.4878	134797	3037G>C	rs140593	168	126	278	34	16	174
FBN1	Marfan syndrome	15:48744825	134797	5479A>C	NA	30	194	81	14	22	98		FBN1	Marfan syndrome	15.4878	134797	3037G>A	rs140593	168	126	278	34	16	174
FBN1	Marfan syndrome	15:48744827	134797	5477A>G	NA	29	193	80	15	22	96		FBN1	Marfan syndrome	15.4878	134797	2950G>A	NA	186	176	150	18	21	203
FBN1	Marfan syndrome	15:48744833	134797	5471G>A	NA	30	190	73	15	22	99		FBN1	Marfan syndrome	15.4878	134797	2942G>C	NA	176	180	124	16	21	197
FBN1	Marfan syndrome	15:48744837	134797	5467G>T	NA	32	184	72	15	19	101		FBN1	Marfan syndrome	15.4878	134797	2939G>A	NA	178	182	126	14	21	194
FBN1	Marfan syndrome	15:48744851	134797	5453G>A	NA	35	181	74	15	20	97		FBN1	Marfan syndrome	15.4878	134797	2938T>A	NA	140	138	63	10	20	149
FBN1	Marfan syndrome	15:48744852	134797	5452T>G	NA	34	182	68	15	21	98		FBN1	Marfan syndrome	15.4878	134797	2927G>A	rs140954477	57	76	19	4	20	72
FBN1	Marfan syndrome, incomplete	15:48744869	134797	5435G>A	NA	39	169	69	15	24	89		FBN1	Marfan syndrome	15.4878	134797	2785A>C	NA	77	67	272	39	11	86
FBN1	Marfan syndrome	15:4874487	134797	5434T>C	NA	39	167	71	15	23	88		FBN1	Marfan syndrome	15.4878	134797	2777G>A	NA	99	83	334	50	15	105
FBN1	Marfan syndrome	15:48744873	134797	5431G>A	NA	37	167	72	14	22	87		FBN1	Marfan syndrome	15.4879	134797	2261A>G	rs137854479	16	34	71	23	23	194
FBN1	Marfan syndrome	15:48744882	134797	5423-1G>A	NA	38	154	66	17	24	87		FBN1	Marfan syndrome	15.488	134797	2113+3A>C	NA	20	30	109	21	19	65
FBN1	Marfan syndrome	15:48744882	134797	5423-1G>T	NA	38	154	66	17	24	87		FBN1	Marfan syndrome	15.488	134797	1961-3T>G	NA	18	98	298	74	27	99
FBN1	Lens luxation and striae	15:48748834	134797	5422G>C	NA	39	151	63	18	20	86		FBN1	Marfan syndrome	15.488	134797	1960G>A	NA	19	113	345	84	24	120
FBN1	Marfan syndrome	15:48748839	134797	5417G>A	NA	39	150	61	19	22	85		FBN1	Marfan syndrome	15.488	134797	1955G>A	NA	16	108	386	90	20	116
FBN1	Marfan syndrome	15:48748839	134797	5417G>C	NA	39	150	61	19	22	85		FBN1	Marfan syndrome	15.488	134797	1955G>C	NA	16	108	386	90	20	116
FBN1	Marfan syndrome	15:48748852	134797	5404A>T	NA	39	148	62	19	21	84		FBN1	Marfan syndrome	15.488	134797	1948C>T	rs193922185	12	94	382	90	22	107
FBN1	Marfan syndrome	15:48748869	134797	5387G>T	NA	39	144	63	19	22	83		FBN1	Marfan syndrome	15.488	134797	1928T>C	NA	12	89	380	88	21	104
FBN1	Kyphoscoliosis	15:48748869	134797	5387G>A	NA	39	144	63	19	22	83		FBN1	Marfan syndrome	15.488	134797	1916G>A	NA	10	82	350	79	21	98
FBN1	Marfan syndrome, incomplete	15:4874887	134797	5386G>T	NA	41	139	59	18	22	84		FBN1	Marfan syndrome	15.488	134797	1911T>G	NA	10	82	351	75	21	100
FBN1	Marfan syndrome	15:48748877	134797	5379T>G	NA	40	135	59	19	22	84		FBN1	Marfan syndrome	15.488	134797	1910G>T	NA	12	72	328	62	25	85
FBN1	Marfan syndrome	15:48748878	134797	5378G>A	NA	42	130	57	19	20	80		FBN1	Marfan syndrome	15.488	134797	1909T>C	NA	12	70	328	59	27	76
FBN1	Marfan syndrome	15:48748879	134797	5377T>C	NA	43	127	57	19	19	80		FBN1	Marfan syndrome	15.488	134797	1907G>T	NA	12	65	307	47	26	74
FBN1	Marfan syndrome	15:48748884	134797	5372G>T	NA	44	120	49	18	20	77		FBN1	Marfan syndrome	15.488	134797	1905C>G	NA	12	68	307	49	26	74
FBN1	Marfan syndrome	15:48748884	134797	5372G>A	NA	44	120	49	18	20	77		FBN1	Marfan syndrome	15.488	134797	1883G>A	NA	112	97	438	96	19	117
FBN1	Marfan syndrome	15:48748885	134797	5371T>C	NA	45	110	45	13	25	80		FBN1	Tall stature, association with	15.488	134797	1875T>C	rs25458	124	102	533	101	18	127
FBN1	Marfan syndrome	15:48748887	134797	5369G>C	NA	47	105	43	12	25	79		FBN1	Marfan syndrome	15.488	134797	1868G>T	NA	128	97	518	98	18	118
FBN1	Marfan syndrome	15:48748888	134797	5368C>T	rs113249837	46	101	44	14	25	76		FBN1	Marfan syndrome	15.488	134797	1847A>G	rs25457	107	102	467	91	18	109
FBN1	Marfan syndrome	15:48748911	134797	5345G>A	NA	43	94	43	14	24	78		FBN1	Marfan syndrome	15.488	134797	1693C>T	rs113422242	83	0	0	183	22	61
FBN1	Ectopia lentis	15:48748912	134797	5344T>C	NA	45	91	43	14	22	77		FBN1	Marfan syndrome	15.488	134797	1678G>A	NA	63	0	1	1	28	81
FBN1	Marfan syndrome	15:48748913	134797	5343G>A	rs140649	44	90	42	14	24	76		FBN1	Fibrillinopathy	15.488	134797	1670G>A	NA	151	0	0	48	26	92
FBN1	Marfan syndrome	15:48748914	134797	5342T>C	NA	43	85	41	15	24	68		FBN1	Aortic aneurysm	15.488	134797	1663T>C	NA	95	1	0	35	30	92
FBN1	Marfan syndrome	15:48748917	134797	5339G>A	NA	42	83	41	14	25	71		FBN1	Marfan syndrome	15.488	134797	1643A>T	rs137854462	88	1	0	28	22	92
FBN1	Marfan syndrome	15:4874892	134797	5336delA	NA	42	81	41	16	23	72		FBN1	Marfan syndrome	15.488	134797	1638C>G	NA	92	2	0	14	33	97
FBN1	Marfan syndrome, incomplete	15:48748926	134797	5330G>T	NA	42	81	41	16	23	72		FBN1	Marfan syndrome	15.488	134797	1629_1633delTGGAC	NA	80	4	0	8	28	96
FBN1	Marfan syndrome	15:48748942	134797	5314G>T	NA	46	113	95	7	19	72		FBN1	Marfan syndrome	15.488	134797	1633C>T	NA	80	4	0	8	28	96
FBN1	Marfan syndrome	15:48748945	134797	5311delC	NA	52	118	101	8	20	79		FBN1	Marfan syndrome	15.488	134797	1630G>C	NA	59	3	0	1	26	133
FBN1	Marfan syndrome	15:48748947	134797	5309G>T	NA	56	124	96	8	20	88		FBN1	Marfan syndrome	15.488	134797	1622G>A	NA	76	8	0	0	34	222
FBN1	Marfan syndrome	15:48748947	134797	5309G>A	NA	56	124	96	8	20	88		FBN1	Marfan syndrome	15.488	134797	1606C>T	NA	75	7	0	0	31	253
FBN1	Marfan syndrome	15:48748951	134797	5305G>A	NA	66	132	104	9	20	88		FBN1	Marfan syndrome	15.488	134797	1604delT	NA	40	3	0	0	25	151
FBN1	Marfan syndrome	15:48748961	134797	5297-2A>G	NA	61	124	87	7	28	89		FBN1	Marfan syndrome	15.488	134797	1601G>A	NA	66	5	0	0	30	234
FBN1	Marfan syndrome	15:48748961	134797	5297-2A>C	NA	61	124	87	7	28	89		FBN1	Marfan syndrome	15.488	134797	1600T>C	NA	73	4	0	1	32	245
FBN1	Geleophysic dysplasia	15:48755305	134797	5198G>A	NA	82	272	350	114	19	184		FBN1	Marfan syndrome	15.488	134797	1598A>G	NA	92	4	0	1	32	261
FBN1	Acromicric dysplasia	15:48755338	134797	5165C>G	NA	1	0	1	0	30	3		FBN1	Marfan syndrome	15.4881	134797	1588G>A	NA	87	2	0	10	35	255
FBN1	Marfan syndrome	15:48755341	134797	5162G>A	NA	179	255	291	55	19	168		FBN1	Marfan syndrome	15.4881	134797	1585C>T	rs137854476	58	0	0	9	24	200
FBN1	Acromicric dysplasia	15:48755404	134797	5099A>G	NA	63	244.5	364	84.5	17	142.5		GLA	Fabry disease	X.100652948	300644	1139delC	NA	98	236	246	76	18	197
FBN1	Marfan syndrome	15:48757802	134797	4905delC	NA	53	0	0	75	27	56		GLA	Fabry disease	X.100652955	300644	1132T>C	NA	91	231	247	81	18	193
FBN1	Marfan syndrome	15:48757986	134797	4816+1G>T	NA	86	331	519	80	16	183		GLA	Fabry disease	X.100652969	300644	1118G>A	NA	91	204	198	80	19	185
FBN1	Marfan syndrome	15:4875799	134797	4813G>A	NA	86	331	519	80	16	183		GLA	Fabry disease	X.100653918	300644	656T>C	NA	19	119	388	120	23	117
FBN1	Marfan syndrome	15:48760686	134797	4505G>A	NA	7	41	197	36	31	112		GLA	Fabry disease	X.100653927	300644	646dupT	NA	19	110	375	123	26	105
FBN1	Marfan syndrome	15:48760696	134797	4495A>T	NA	8	40	199	36	31	111		GLA	Fabry disease	X.100653927	300644	647A>G	NA	19	110	375	123	26	105
FBN1	Aortic aneurysm	15:48760701	134797	4490G>A	NA	14	57	211	32	26	98		GLA	Fabry disease	X.100653928	300644	646T>G	NA	19	113	380	119	26	106
FBN1	Marfan syndrome	15:48760701	134797	4490G>C	NA	14	57	211	32	26	98		GLA	Fabry disease	X.100653928	300644	646delT	NA	19	113	380	119	26	106
FBN1	Marfan syndrome	15:48760706	134797	4485delC	NA	14.25	67.75	216.5	29.5	23.25	104.25		GLA	Fabry disease	X.100653930	300644	644A>G	rs28935197	18	111	372	116	27	106
FBN1	Marfan syndrome	15:48760717	134797	4474delC	NA	14	68	228	31	26	102		GLA	Fabry disease	X.100653935	300644	640-1G>A	NA	18	99	347	110	27	102
FBN1	Marfan syndrome	15:48760719	134797	4472G>A	NA	17	72	259	29	26	102		GLA	Fabry disease	X.100653936	300644	640-2A>T	NA	18	97	336	112	28	101
FBN1	Marfan syndrome	15:48760719	134797	4472G>T	NA	17	72	259	29	26	102		GLA	Fabry disease	X.100653937	300644	640-3C>G	NA	18	97	335	101	29	100
FBN1	Marfan syndrome	15:48760724	134797	4467T>A	rs193922205	17	75	260	27	27	104		GLA	Fabry disease	X.100653945	300644	640-11T>A	NA	14	86	327	103	27	92
FBN1	Marfan syndrome	15:48760731	134797	4460A>C	NA	18	75	275	29	24	108		GLA	Fabry disease	X.100654735	300644	639+919G>A	NA	1	70	0	1	31	92
FBN1	Marfan syndrome	15:48760732	134797	4460-1G>T	NA	18	75	275	29	24	108		GLA	Fabry disease	X.100654793	300644	639+861C>T	NA	0	87	0	1	37	105
FBN1	Marfan syndrome	15:48760739	134797	4460-8G>A	rs193922204	19	83	240	22	31	112		GLA	Fabry disease	X.100655673	300644	620A>C	NA	81.33	227	267.67	34	19	259
FBN1	Marfan syndrome	15:4876283	134797	4459+1G>A	NA	18	83	244	19	29	110		GLA	Fabry disease	X.100655673	300644	620A>G	NA	81.33	227	267.67	34	19	259
FBN1	Marfan syndrome	15:48762831	134797	4459G>A	rs113693945	15	65	207	23	31	97		GLA	Fabry disease	X.100655682	300644	611G>A	NA	84	219	226	36	19	256
FBN1	Marfan syndrome	15:48762836	134797	4454G>A	NA	16	62	212	22	31	93		GLA	Fabry disease	X.100655691	300644	602C>A	NA	80	216	248	37	18	249
FBN1	Marfan syndrome	15:48762881	134797	4409G>A	NA	17	276	123	134	29	204		GLA	Fabry disease	X.100655691	300644	602C>T	NA	80	216	248	37	18	249
FBN1	Marfan syndrome	15:48766541	134797	4121G>A	NA	17	146	479	32	37	93		GLA	Fabry disease	X.100655698	300644	595G>A	NA	78	218	217	35	17	250
FBN1	Marfan syndrome	15:48766541	134797	4121G>C	NA	17	146	479	32	37	93		GLA	Fabry disease	X.100655703	300644	590delG	NA	81	213	200	36	17	246
FBN1	Marfan syndrome	15:48766542	134797	4120T>G	NA	15	154	420	27	44	98		GLA	Fabry disease	X.100655709	300644	584G>T	NA	82	210	206	36	18	242
FBN1	Marfan syndrome	15:48766563	134797	4099T>C	NA	15	153	413	26	44	98		GLA	Parkinson disease	X.100663464	300644	NA	NA	1	2	1	16	19	6
FBN1	Marfan syndrome	15:48766566	134797	4096G>T	NA	9	152	417	18	47	106		KCNH2	Long QT syndrome	7.15064	152427	2843G>A	rs199473011	100	63	338	20	19	404
FBN1	Marfan syndrome	15:48766566	134797	4096G>A	NA	9	152	417	18	47	106		KCNH2	Long QT syndrome	7.15064	152427	2842C>T	rs121912514	96	65	333	20	18	413
FBN1	Marfan syndrome	15:4877935	134797	3511T>C	NA	26	3	2	0	14	11		KCNH2	Long QT syndrome	7.15064	152427	2842C>A	rs121912514	96	65	333	20	18	413
FBN1	Marfan syndrome	15:48779352	134797	3509G>A	rs137854475	25	3	3	0	15	11		KCNH2	Long QT syndrome	7.15064	152427	2810G>A	rs199473540	101	68	339	22	17	434
FBN1	Marfan syndrome	15:48779358	134797	3503A>G	NA	16	30	63	0	17	23		KCNH2	Long QT syndrome	7.15064	152427	2780G>A	NA	108	71	323	29	19	475
FBN1	Marfan syndrome	15:48779364	134797	3497G>A	NA	16	35	86	0	17	22		KCNH2	Long QT syndrome	7.15064	152427	2773G>A	rs199473010	116	78	356	28	18	512
FBN1	Marfan syndrome	15:48779388	134797	3473A>G	NA	0	2	0	1	34	1		KCNH2	Long QT syndrome	7.15064	152427	2771G>C	rs199473009	115.9	78.8	364.4	28	19.5	533.5
FBN1	Marfan syndrome	15:48779397	134797	3464A>G	NA	0	0	0	1	19	1		KCNH2	Long QT syndrome	7.15064	152427	2771G>A	rs199473009	115.9	78.8	364.4	28	19.5	533.5
FBN1	Marfan syndrome	15:48779398	134797	3464-1G>A	NA	9	64	78	2	29	34		KCNH2	Long QT syndrome	7.15064	152427	2768delC	NA	104	76	351	27	18	545
FBN1	Marfan syndrome	15:48779508	134797	3463+1G>A	NA	49	193	186	11	29	141		KCNH2	Long QT syndrome	7.15065	152427	2204C>T	rs199472988	13	23	61	60.5	30.5	35.5
FBN1	Marfan syndrome	15:48779509	134797	3463G>C	NA	61	192	183	17	31	152		KCNH2	Long QT syndrome	7.15065	152427	2114G>A	NA	75	140	93	69	16	153
FBN1	Marfan syndrome	15:48779509	134797	3463G>A	NA	61	192	183	17	31	152		KCNH2	Long QT syndrome	7.15065	152427	2092G>T	NA	68	147	115	77	16	154
FBN1	Marfan syndrome	15:48779509	134797	3463G>A	NA	61	192	183	17	31	152		KCNH2	Long QT syndrome	7.15065	152427	1902delC	NA	207	249	449	82	18	269
FBN1	Marfan syndrome	15:48779514	134797	3458G>A	rs140599	59	187	173	14	35	157		KCNH2	Long QT syndrome	7.15065	152427	1877G>C	rs199472952	61	128	192	8	29	122
FBN1	Marfan syndrome	15:48779514	134797	3458G>C	NA	59	187	173	14	35	157		KCNH2	Long QT syndrome	7.15065	152427	1877G>A	rs199472952	61	128	192	8	29	122
FBN1	Marfan syndrome	15:48779517	134797	3455C>T	NA	59	179	133	15	26	149		KCNH2	Long QT syndrome	7.15065	152427	1877delG	NA	61	128	192	8	29	122
FBN1	Marfan syndrome	15:48779579	134797	3393C>G	NA	24	78	122	37	19	83		KCNH2	Long QT syndrome	7.15065	152427	1877G>T	rs199472952	61	128	192	8	29	122
FBN1	Marfan syndrome	15:48779581	134797	3391A>T	rs137854473	24	74	98	34	18	75		KCNH2	Long QT syndrome	7.15065	152427	1868C>T	rs199472950	25	37	114	19	24	146
FBN1	Marfan syndrome	15:48780418	134797	3229T>C	rs140586	41	82	143	85	14	79		KCNH2	Long QT syndrome	7.15065	152427	1864C>T	rs199473525	22	39	90	18	28	140
FBN1	Marfan syndrome	15:48780426	134797	3221G>A	NA	41	80	139	95	15	76		KCNH2	Long QT syndrome	7.15065	152427	1862G>A	rs199472948	18	38	79	10	21	137
FBN1	Marfan syndrome	15:48780427	134797	3220T>C	rs137854465	41	76	130	89	14	66		KCNH2	Long QT syndrome	7.15065	152427	1861A>C	NA	17	36	73	11	21	135
FBN1	Marfan syndrome	15:48780428	134797	3219A>T	NA	38	78	138	89	16	65		KCNH2	Long QT syndrome	7.15065	152427	1840_1841delGCinsTT	NA	37	115	137	53	16	96
FBN1	Marfan syndrome	15:48780432	134797	3215A>G	NA	13	43	117	64	29	40		KCNH2	Long QT syndrome	7.15065	152427	1841C>T	rs199472944	37	115	137	53	16	96
FBN1	Marfan syndrome	15:48780435	134797	3212T>G	NA	18	46	136	56	25	48		KCNH2	Long QT syndrome	7.15065	152427	1838C>T	rs199473524	36	109	136	52	15	94
FBN1	Marfan syndrome	15:487806	134797	3173G>A	NA	60	82	65	37	17	55		KCNH2	Long QT syndrome	7.15065	152427	1817C>T	NA	95	137	182	15	23	130
FBN1	Marfan syndrome	15:48782048	134797	3082G>T	NA	105	112	215	26	19	80		KCNH2	Long QT syndrome 2	7.15065	152427	1816T>C	rs199473523	88	151	148	7	18	147
FBN1	Marfan syndrome	15:48782061	134797	3069G>C	NA	103	130	225	23	16	88		KCNH2	Long QT syndrome	7.15065	152427	1781G>A	rs199472931	12	36	329	50	29	80
FBN1	Marfan syndrome	15:48782072	134797	3058A>G	rs111801777	129	164	241	29	17	113		KCNH2	Long QT syndrome	7.15065	152427	1778T>G	rs28928904	4	4	64	21	25	58
FBN1	Marfan syndrome	15:48782087	134797	3043G>C	NA	130	163	243	31	16	115		KCNH2	Long QT syndrome	7.15065	152427	1778T>A	rs28928904	4	4	64	21	25	58
FBN1	Marfan syndrome	15:48782087	134797	3043G>A	rs55831697	130	163	243	31	16	115		KCNH2	Long QT syndrome 2	7.15065	152427	1777A>G	rs199472930	94	76	19	25	29	83
FBN1	Marfan syndrome	15:48782093	134797	3037G>C	rs140593	147	186	249	30	16	144		KCNH2	Long QT syndrome	7.15065	152427	1775delA	NA	103	74	18	23	28	79
FBN1	Marfan syndrome	15:48782093	134797	3037G>A	rs140593	147	186	249	30	16	144		KCNH2	Long QT syndrome 2	7.15065	152427	1769G>T	rs199472929	178	99	100	8	27	96
FBN1	Marfan syndrome	15:48782177	134797	2953G>A	NA	165	235	191	19	24	182		KCNH2	Short QT syndrome	7.15065	152427	1764C>A	rs104894021	293	157	373	3	30	138
FBN1	Ectopia lentis	15:48782179	134797	2951T>A	NA	160	227	172	14	23	174		KCNH2	Short QT syndrome	7.15065	152427	1764C>G	rs104894021	293	157	373	3	30	138
FBN1	Marfan syndrome	15:4878218	134797	2950G>A	NA	160	234	157	14	21	167		KCNH2	Long QT syndrome	7.15065	152427	1762A>G	rs199473431	294	153	368	3	28	142
FBN1	Marfan syndrome	15:48782188	134797	2942G>C	NA	153	238	135	12	21	164		KCNH2	Long QT syndrome 2	7.15065	152427	1756C>A	NA	305	163	383	3	30	152
FBN1	Marfan syndrome	15:48782191	134797	2939G>A	NA	154	239	135	11	21	162		KCNH2	Long QT syndrome	7.15065	152427	1755G>T	rs199473430	254	200	275	5	26	182
FBN1	Marfan syndrome	15:48782192	134797	2938T>A	NA	125	183	77	9	20	120		KCNH2	Long QT syndrome	7.15065	152427	1751G>T	rs199473429	152	133	73	6	30	102
FBN1	Marfan syndrome	15:48782203	134797	2927G>A	rs140954477	51	97	22	6	20	57		KCNH2	Long QT syndrome 2	7.15065	152427	1750G>T	rs199473428	148	111	94	5	25	77
FBN1	Marfan syndrome	15:48784727	134797	2785A>C	NA	67	96	251	32	11	79		KCNH2	Long QT syndrome	7.15065	152427	1750G>C	rs199473428	148	111	94	5	25	77
FBN1	Marfan syndrome	15:48784735	134797	2777G>A	NA	87	126	300	36	15	98		KCNH2	Long QT syndrome	7.15065	152427	1750G>A	rs199473428	148	111	94	5	25	77
FBN1	Marfan syndrome	15:48789463	134797	2293G>A	NA	19	64	68	51	20	218		KCNH2	Long QT syndrome	7.15065	152427	1744C>T	rs121912508	63	85	246	18	18	100
FBN1	Marfan syndrome	15:48789495	134797	2261A>G	rs137854479	14	45	56	26	23	177		KCNH2	Long QT syndrome	7.15065	152427	1742C>A	NA	76	84	258	21	16	83
FBN1	Marfan syndrome	15:48795981	134797	2113+3A>C	NA	17	36	94	14	19	63		KCNH2	Long QT syndrome	7.15065	152427	1736T>C	rs199473425	94	78	272	20	17	78
FBN1	Marfan syndrome	15:48795984	134797	2113G>A	NA	28	61	118	18	23	88		KCNH2	Long QT syndrome	7.15065	152427	1715G>A	rs199473423	9	63	96	46	24	61
FBN1	Fibrillinopathy	15:48795984	134797	2113G>A	NA	28	61	118	18	23	88		KCNH2	Long QT syndrome	7.15065	152427	1715G>T	rs199473423	9	63	96	46	24	61
FBN1	Marfan syndrome	15:48796	134797	2097T>A	NA	32	73	130	15	21	106		KCNH2	Long QT syndrome	7.15065	152427	1714G>T	rs9333649	14	52	100	54	22	59
FBN1	Ectopia lentis	15:48796001	134797	2096G>C	NA	35	76	123	16	23	112		KCNH2	Long QT syndrome	7.15065	152427	1714G>C	rs9333649	14	52	100	54	22	59
FBN1	Shprintzen-Goldberg syndrome	15:48796009	134797	2088C>A	NA	37	76	139	17	23	115		KCNH2	Long QT syndrome	7.15065	152427	1714G>A	rs9333649	14	52	100	54	22	59
FBN1	Marfan syndrome	15:4879604	134797	2057C>A	rs193922186	43	104	185	19	21	143		KCNH2	Long QT syndrome	7.15065	152427	1711A>C	rs199472928	16	43	93	46	23	64
FBN1	Marfan syndrome	15:48796041	134797	2056G>A	NA	42	107	198	18	22	153		KCNH2	Long QT syndrome	7.15065	152427	1711A>G	rs199472928	16	43	93	46	23	64
FBN1	Marfan syndrome	15:48796139	134797	1961-3T>G	NA	16	135	302	64	27	86		KCNH2	Long QT syndrome	7.15065	152427	1706A>G	NA	17	44	91	48	22	65
FBN1	Marfan syndrome	15:48797222	134797	1960G>A	NA	16	154	348	70	24	105		KCNH2	Long QT syndrome	7.15065	152427	1655T>C	rs199472918	11	32	144	16	24	41
FBN1	Marfan syndrome	15:48797227	134797	1955G>A	NA	15	149	395	81	20	103		KCNH2	Long QT syndrome	7.15065	152427	1609C>T	rs199472917	15	45	161	14	25	43
FBN1	Marfan syndrome	15:48797227	134797	1955G>C	NA	15	149	395	81	20	103		KCNH2	Long QT syndrome 2	7.15065	152427	1603G>A	NA	16	47	178	15	27	50
FBN1	Marfan syndrome	15:48797234	134797	1948C>T	rs193922185	12	138	390	74	22	95		KCNH2	Long QT syndrome	7.15065	152427	1601G>T	rs199473516	19	48	175	17	30	53
FBN1	Marfan syndrome	15:48797254	134797	1928T>C	NA	12	131	385	72	21	90		KCNH2	Long QT syndrome	7.15065	152427	1600C>T	rs199472916	21	46	175	16	32	58
FBN1	Marfan syndrome	15:48797266	134797	1916G>A	NA	11	119	352	68	21	88		KCNH2	Long QT syndrome	7.15065	152427	1592G>A	rs199473515	21	46	167	15	31	57
FBN1	Marfan syndrome	15:48797271	134797	1911T>G	NA	11	118	350	63	21	89		KCNH2	Long QT syndrome	7.15065	152427	1591C>T	rs199472915	25	51	165	17	31	63
FBN1	Marfan syndrome	15:48797272	134797	1910G>T	NA	11	96	306	58	25	72		KCNH2	Long QT syndrome	7.15065	152427	1583G>C	rs199472914	25	51	162	16	31	66
FBN1	Marfan syndrome	15:48797273	134797	1909T>C	NA	11	94	313	56	27	64		KCNH2	Long QT syndrome	7.15065	152427	1575G>T	rs199472913	29	51	143	16	37	70
FBN1	Marfan syndrome	15:48797275	134797	1907G>T	NA	9	90	290	50	26	61		KCNH2	Long QT syndrome	7.15065	152427	1564G>A	rs199473514	30	51	126	17	34	72
FBN1	Marfan syndrome	15:48797277	134797	1905C>G	NA	9	93	293	51	26	61		KCNH2	Long QT syndrome	7.15065	152427	1557+1G>C	NA	47	42	121	19	20	84
FBN1	Marfan syndrome	15:48797299	134797	1883G>A	NA	100	141	402	104	19	101		KCNH2	Long QT syndrome	7.15065	152427	1502A>G	rs199473513	45	46	102	14	13	87
FBN1	Tall stature, association with	15:48797307	134797	1875T>C	rs25458	107	150	495	99	18	108		KCNH2	Long QT syndrome	7.15065	152427	1501G>C	rs199472912	65	45	232	27	17	138
FBN1	Marfan syndrome	15:48797314	134797	1868G>T	NA	110	146	486	93	18	102		KCNH2	Long QT syndrome	7.15065	152427	1501G>A	rs199472912	65	45	232	27	17	138
FBN1	Marfan syndrome	15:48797335	134797	1847A>G	rs25457	90	126	431	78	18	93		KCNH2	Long QT syndrome	7.15065	152427	1426G>A	rs199472908	78	49	257	27	19	98
FBN1	Marfan syndrome	15:48802262	134797	1693C>T	rs113422242	76	0	0	168	22	59		KCNH2	Long QT syndrome	7.15065	152427	1424A>G	rs199472907	15	100	192	34	17	84
FBN1	Marfan syndrome	15:48802277	134797	1678G>A	NA	57	0	0	2	28	71		KCNH2	Long QT syndrome	7.15065	152427	1421C>T	rs199472906	23	97	225	40	18	90
FBN1	Fibrillinopathy	15:48802285	134797	1670G>A	NA	127	0	0	44	26	87		KCNH2	Long QT syndrome	7.15065	152427	1418C>A	rs199472905	23	97	219	39	18	90
FBN1	Aortic aneurysm	15:48802292	134797	1663T>C	NA	84	1	0	27	30	81		KCNH2	Long QT syndrome	7.15065	152427	1417A>C	rs199473512	25	97	217	44	19	92
FBN1	Marfan syndrome	15:48802312	134797	1643A>T	rs137854462	81	4	0	24	22	82		KCNH2	Long QT syndrome	7.15065	152427	1414delC	NA	28	95	226	44	19	89
FBN1	Marfan syndrome	15:48802317	134797	1638C>G	NA	89	6	0	13	33	85		KCNH2	Long QT syndrome	7.15065	152427	1408A>G	rs121912505	27	93	225	45	19	89
FBN1	Marfan syndrome	15:48802322	134797	1629_1633delTGGAC	NA	75	7	0	7	28	84		KCNH2	Long QT syndrome	7.15065	152427	1348C>T	NA	104	111	123	13	18	127
FBN1	Marfan syndrome	15:48802322	134797	1633C>T	NA	75	7	0	7	28	84		KCNH2	Long QT syndrome	7.15065	152427	1342G>A	NA	73	84	103	38	17	94
FBN1	Marfan syndrome	15:48802325	134797	1630G>C	NA	53	7	0	1	26	115		KCNH2	Long QT syndrome	7.15065	152427	1341C>A	NA	136	178	147	20	11	188
FBN1	Marfan syndrome	15:48802333	134797	1622G>A	NA	73	6	0	0	34	203		KCNH2	Long QT syndrome	7.15065	152427	1332G>T	rs9770044	117	174	129	22	13	170
FBN1	Marfan syndrome	15:48802349	134797	1606C>T	NA	75	5	0	0	31	221		KCNH2	Long QT syndrome	7.15065	152427	1286delC	NA	109	118	433	58	19	135
FBN1	Marfan syndrome	15:48802351	134797	1604delT	NA	40	3	0	0	25	134		KCNH2	Long QT syndrome	7.15065	152427	1283C>A	NA	120	111	442	63	19	133
FBN1	Marfan syndrome	15:48802354	134797	1601G>A	NA	62	3	0	1	30	206		KCNH2	Long QT syndrome	7.15065	152427	1283C>T	rs199472899	120	111	442	63	19	133
FBN1	Marfan syndrome	15:48802355	134797	1600T>C	NA	69	2	0	2	32	223		KCNH2	Long QT syndrome	7.15065	152427	1259A>G	rs199473507	19	44	266	36	26	80
FBN1	Marfan syndrome	15:48802357	134797	1598A>G	NA	88	3	0	2	32	230		KCNH2	Long QT syndrome	7.15065	152427	1199T>A	rs199472891	15	85	348	69	30	77
FBN1	Marfan syndrome	15:48805746	134797	1588G>A	NA	78	2	0	7	35	222		KCNH2	Long QT syndrome	7.15065	152427	1096C>T	NA	16	21	74	82	32	37
FBN1	Marfan syndrome	15:48805749	134797	1585C>T	rs137854476	57	1	0	7	24	170		KCNH2	Long QT syndrome, drug-associated	7.15065	152427	1025A>T	rs199472889	44	86	164	74	17	77
GLA	Fabry disease	X:100652948	300644	1139delC	NA	90	299	236	78	18	165		KCNH2	Long QT syndrome	7.15065	152427	967G>A	rs199472887	23	41	109	39	18	149
GLA	Fabry disease	X:100652955	300644	1132T>C	NA	83	294	236	80	18	163		KCNH2	Long QT syndrome	7.15065	152427	959C>A	NA	16	37	104	42	22	152
GLA	Fabry disease	X:100652969	300644	1118G>A	NA	81	272	174	76	19	151		KCNH2	Long QT syndrome	7.15065	152427	959C>T	rs199472886	16	37	104	42	22	152
GLA	Fabry disease	X:100653886	300644	688G>A	NA	17	154	402	105	21	112		KCNH2	Long QT syndrome	7.15065	152427	940G>A	rs199473504	42	65	218	8	24	116
GLA	Fabry disease	X:100653887	300644	687T>G	NA	18	155	398	105	20	110		KCNH2	Long QT syndrome	7.15065	152427	934C>T	rs199472885	99	109	354	19	32	140
GLA	Fabry disease	X:100653894	300644	680G>A	rs104894840	16	150	379	105	23	111		KCNH2	Long QT syndrome	7.15066	152427	548delG	NA	148	97	143	27	15	100
GLA	Fabry disease	X:100653895	300644	679C>T	rs104894841	16	154	376	107	24	114		KCNH2	Long QT syndrome	7.15066	152427	506delC	NA	16	32	24	2	19	49
GLA	Fabry disease	X:100653896	300644	678G>T	NA	16	154	378	108	23	114		KCNH2	Long QT syndrome	7.15066	152427	491G>A	rs199472866	11	21	6	0	18	42
GLA	Fabry disease	X:100653896	300644	678delG	NA	16	154	378	108	23	114		KCNH2	Long QT syndrome	7.15066	152427	473-7C>A	NA	10	22	7	0	22	48
GLA	Fabry disease	X:100653897	300644	677G>A	NA	15	150	373	108	23	115		KCNH2	Long QT syndrome	7.15066	152427	453delC	NA	8	16	5	0	20	44
GLA	Fabry disease	X:100653898	300644	676T>C	NA	15	151	383	110	24	116		KCNH2	Long QT syndrome	7.15066	152427	445_446insC	NA	2	4	5	0	26	23
GLA	Fabry disease	X:100653900	300644	674A>G	NA	15	155	384	112	22	115		KCNH2	Long QT syndrome	7.15066	152427	446G>C	rs199472865	2	4	5	0	26	23
GLA	Fabry disease	X:100653903	300644	671A>G	NA	18	154	385	114	24	115		KCNH2	Long QT syndrome	7.15066	152427	442C>T	rs139544114	2.58	6.47	33.42	0	22.89	25.58
GLA	Fabry disease	X:100653904	300644	670A>G	NA	18	151	398	113	24	114		KCNH2	Long QT syndrome	7.15066	152427	374T>G	rs199473499	63	315	367	107	19	288
GLA	Fabry disease	X:100653906	300644	668G>A	NA	18	154	399	116	24	113		KCNH2	Long QT syndrome	7.15067	152427	298C>G	rs121912515	65.2	177.6	191.8	39.8	19.6	174.4
GLA	Fabry disease	X:100653907	300644	667T>C	NA	18	151	401	115	24	113		KCNH2	Long QT syndrome	7.15067	152427	298C>T	rs121912515	65.2	177.6	191.8	39.8	19.6	174.4
GLA	Fabry disease	X:100653907	300644	667T>G	NA	18	151	401	115	24	113		KCNH2	Long QT syndrome	7.15067	152427	284A>G	NA	36	113	106	17	19	102
GLA	Fabry disease	X:100653908	300644	666C>A	rs104894851	18	150	398	115	23	111		KCNH2	Long QT syndrome	7.15067	152427	281T>G	rs199472852	47	100	237	39	18	114
GLA	Fabry disease	X:100653913	300644	661C>T	NA	17	146	385	118	24	109		KCNH2	Long QT syndrome	7.15067	152427	241C>T	NA	110	101	201	44	15	143
GLA	Fabry disease	X:100653916	300644	658C>T	NA	17	141	385	113	24	105		KCNH2	Long QT syndrome	7.15067	152427	234_241delTGCCGCGC	NA	110	101	201	44	15	143
GLA	Fabry disease	X:100653918	300644	656T>C	NA	16	137	379	114	23	104		KCNH2	Sudden arrhythmic death syndrome	7.15067	152427	239C>T	rs199473493	123	130	227	52	15	161
GLA	Fabry disease	X:100653927	300644	646dupT	NA	15	124	369	114	26	94		KCNH2	Long QT syndrome	7.15067	152427	238G>C	rs199473037	134	131	247	60	17	171
GLA	Fabry disease	X:100653927	300644	647A>G	NA	15	124	369	114	26	94		KCNH2	Long QT syndrome 2	7.15067	152427	122T>C	rs731506	2	1	0	1	26	10
GLA	Fabry disease	X:100653928	300644	646T>G	NA	15	124	372	114	26	95		KCNH2	Long QT syndrome	7.15067	152427	121G>T	rs199472835	4	0	3	0	8	40
GLA	Fabry disease	X:100653928	300644	646delT	NA	15	124	372	114	26	95		KCNQ1	Long QT syndrome	11.2592	607542	560T>C	rs199473399	227	112	116	93	18	130
GLA	Fabry disease	X:100653930	300644	644A>G	rs28935197	14	120	364	110	27	95		KCNQ1	Long QT syndrome	11.2592	607542	565G>A	rs104894252	87	40	26	6	30	104
GLA	Fabry disease	X:100653935	300644	640-1G>A	NA	14	110	333	106	27	90		KCNQ1	Jervell and Lange-Nielsen syndrome	11.2609	607542	1189delC	NA	143	145	261	124	16	162
GLA	Fabry disease	X:100653936	300644	640-2A>T	NA	14	108	319	107	28	89		KCNQ1	Long QT syndrome	11.2609	607542	1189C>T	rs199472776	143	145	261	124	16	162
GLA	Fabry disease	X:100653937	300644	640-3C>G	NA	14	108	319	101	29	89		KCNQ1	Altered channel function	11.2869	607542	1927G>A	rs1800172	17	94	137	199	26	149
GLA	Fabry disease	X:100653945	300644	640-11T>A	NA	13	98	317	102	27	82		LDLR	Hypercholesterolaemia	19.1122	606945	347_349delGCC	NA	74	88	87	125	19	78
GLA	Fabry disease	X:100654735	300644	639+919G>A	NA	1	87	0	1	31	89		LDLR	Hypercholesterolaemia	19.1122	606945	347G>T	NA	74	88	87	125	19	78
GLA	Fabry disease	X:100654793	300644	639+861C>T	NA	0	110	0	1	37	97		LDLR	Hypercholesterolaemia	19.1122	606945	571C>T	NA	1	0	3	0	40	49
GLA	Fabry disease	X:100655673	300644	620A>C	NA	71.67	292.33	262	19.33	19	215.67		LDLR	Hypercholesterolaemia	19.1122	606945	578delA	NA	2	0	0	0	43	11
GLA	Fabry disease	X:100655673	300644	620A>G	NA	71.67	292.33	262	19.33	19	215.67		LDLR	Hypercholesterolaemia	19.1122	606945	578_584delACAGTAG	NA	2	0	0	0	43	11
GLA	Fabry disease	X:100655682	300644	611G>A	NA	74	292	219	19	19	212		LDLR	Hypercholesterolaemia	19.1122	606945	1252G>T	NA	126	162	492	201	19	133
GLA	Fabry disease	X:100655687	300644	606delT	NA	72	290	223	18	20	210		LDLR	Hypercholesterolaemia	19.1122	606945	1252G>A	NA	126	162	492	201	19	133
GLA	Fabry disease	X:100655687	300644	606T>G	rs104894838	72	290	223	18	20	210		LDLR	Hypercholesterolaemia	19.1122	606945	1466A>G	NA	69	0	10	10	15	201
GLA	Fabry disease	X:100655688	300644	605G>A	NA	72	292	225	18	20	212		LDLR	Hypercholesterolaemia	19.1122	606945	1467C>G	NA	90	0	12	10	15	302
GLA	Fabry disease	X:100655691	300644	602C>A	NA	72	292	236	18	18	209		LDLR	Hypercholesterolaemia	19.1122	606945	1468T>C	NA	104	0	10	10	17	347
GLA	Fabry disease	X:100655691	300644	602C>T	NA	72	292	236	18	18	209		LDLR	Hypercholesterolaemia	19.1122	606945	1468T>G	NA	104	0	10	10	17	347
GLA	Fabry disease	X:100655698	300644	595G>A	NA	72	288	216	18	17	210		LDLR	Hypercholesterolaemia	19.1122	606945	1469G>A	NA	113	0	12	10	17	367
GLA	Fabry disease	X:100655703	300644	590delG	NA	73	282	189	20	17	208		LDLR	Hypercholesterolaemia	19.1122	606945	1470G>A	NA	165	0	17	23	16	561
GLA	Fabry disease	X:100655709	300644	584G>T	NA	74	281	190	21	18	204		LDLR	Hypercholesterolaemia	19.1122	606945	1474G>A	NA	70	8	76	14	19	260
GLA	Parkinson disease	X:100663464	300644	NA	NA	0	2	1	17	19	7		LDLR	Hypercholesterolaemia	19.1122	606945	1474G>C	NA	70	8	76	14	19	260
KCNH2	Sudden infant death syndrome	7:150644799	152427	2860C>T	rs141401803	18	188	53	37	26	145		LDLR	Hypercholesterolaemia	19.1122	606945	1475A>G	NA	55	10	76	9	18	193
KCNH2	Long QT syndrome	7:150644816	152427	2843G>A	rs199473011	87	94	295	21	19	344		LDLR	Hypercholesterolaemia	19.1122	606945	1478_1479delCT	NA	44	14	106	12	19	152
KCNH2	Long QT syndrome	7:150644817	152427	2842C>T	rs121912514	85	94	301	22	18	354		LDLR	Hypercholesterolaemia	19.1122	606945	1487G>T	NA	41	18	90	11	19	138
KCNH2	Long QT syndrome	7:150644817	152427	2842C>A	rs121912514	85	94	301	22	18	354		LDLR	Hypercholesterolaemia	19.1122	606945	1489A>C	NA	38.8	21.6	76.4	5	15	124.8
KCNH2	Long QT syndrome	7:150644849	152427	2810G>A	rs199473540	89	97	303	22	17	375		LDLR	Hypercholesterolaemia	19.1122	606945	1492G>T	NA	41	24	74	5	15	133
KCNH2	Long QT syndrome	7:150644879	152427	2780G>A	NA	98	104	285	22	19	407		LDLR	Hypercholesterolaemia	19.1122	606945	1495T>C	NA	40	24	75	5	14	122
KCNH2	Long QT syndrome	7:150644886	152427	2773G>A	rs199473010	106	105	319	20	18	443		LDLR	Hypercholesterolaemia	19.1122	606945	1503G>A	NA	37	25	62	5	13	105
KCNH2	Long QT syndrome	7:150644888	152427	2771G>C	rs199473009	104.7	103.2	329.4	19.8	19.5	464.1		LDLR	Hypercholesterolaemia	19.1122	606945	1504G>T	NA	33	24	40	4	13	88
KCNH2	Long QT syndrome	7:150644888	152427	2771G>A	rs199473009	104.7	103.2	329.4	19.8	19.5	464.1		LDLR	Hypercholesterolaemia	19.1122	606945	1510A>G	NA	26	21	24	2	18	83
KCNH2	Long QT syndrome	7:150644891	152427	2768delC	NA	92	101	319	20	18	472		LDLR	Hypercholesterolaemia	19.1122	606945	1510A>T	NA	26	21	24	2	18	83
KCNH2	Long QT syndrome	7:15064745	152427	2204C>T	rs199472988	11	29	48.5	51	30.5	24.5		LDLR	Hypercholesterolaemia	19.1122	606945	1514G>A	NA	25	21	19	1	17	78
KCNH2	Long QT syndrome	7:150647472	152427	2164_2181dupGAGTGCCTGCAGGCTGAC	NA	18	36	58	35	21	27		LDLR	Hypercholesterolaemia	19.1122	606945	1520A>C	NA	23	19	18	1	16	75
KCNH2	Long QT syndrome	7:150647472	152427	2182A>T	rs199473533	18	36	58	35	21	27		LDLR	Hypercholesterolaemia	19.1122	606945	1525A>G	NA	21	20	18	1	19	72
KCNH2	Long QT syndrome	7:15064804	152427	2114G>A	NA	69	153	82	68	16	121		LDLR	Hypercholesterolaemia	19.1122	606945	1529C>T	NA	21	16	19	1	20	72
KCNH2	Long QT syndrome	7:150648062	152427	2092G>T	NA	60	155	121	70	16	119		LDLR	Hypercholesterolaemia	19.1123	606945	1592T>A	NA	15	125	353	147	45	99
KCNH2	Long QT syndrome	7:150648579	152427	1902delC	NA	184	341	440	78	18	240		LDLR	Hypercholesterolaemia	19.1123	606945	1597T>C	NA	15	123	359	147	45	101
KCNH2	Long QT syndrome	7:150648604	152427	1877G>C	rs199472952	52	186	158	15	29	116		LDLR	Hypercholesterolaemia	19.1123	606945	1598G>A	NA	15	123	360	147	44	102
KCNH2	Long QT syndrome	7:150648604	152427	1877G>A	rs199472952	52	186	158	15	29	116		LDLR	Hypercholesterolaemia	19.1123	606945	1599G>A	NA	17	133	393	144	42	109
KCNH2	Long QT syndrome	7:150648604	152427	1877delG	NA	52	186	158	15	29	116		LDLR	Hypercholesterolaemia	19.1123	606945	2042G>A	NA	1	10	118	27	29	27
KCNH2	Long QT syndrome	7:150648604	152427	1877G>T	rs199472952	52	186	158	15	29	116		LDLR	Hypercholesterolaemia	19.1123	606945	2042G>C	rs201637900	1	10	118	27	29	27
KCNH2	Long QT syndrome	7:150648613	152427	1868C>T	rs199472950	23	47	101	12	24	138		LDLR	Hypercholesterolaemia	19.1123	606945	2043C>A	rs121908031	4	14	107	33	34	26
KCNH2	Long QT syndrome	7:150648617	152427	1864C>T	rs199473525	22	46	89	9	28	128		LDLR	Hypercholesterolaemia	19.1123	606945	2043C>G	NA	4	14	107	33	34	26
KCNH2	Long QT syndrome	7:150648619	152427	1862G>A	rs199472948	17	45	79	6	21	120		LDLR	Hypercholesterolaemia	19.1123	606945	2045T>C	NA	4	14	113	34	34	29
KCNH2	Long QT syndrome	7:15064862	152427	1861A>C	NA	16	45	78	6	21	116		LDLR	Hypercholesterolaemia	19.1123	606945	2050G>A	NA	4	16	154	34	33	33
KCNH2	Long QT syndrome	7:15064864	152427	1840_1841delGCinsTT	NA	29	133	126	42	16	89		LDLR	Hypercholesterolaemia	19.1123	606945	2050_2063delGCCCCGCAGATCAA	NA	4	16	154	34	33	33
KCNH2	Long QT syndrome	7:15064864	152427	1841C>T	rs199472944	29	133	126	42	16	89		LDLR	Hypercholesterolaemia	19.1123	606945	2053C>T	rs2569548	4	22	219	39	33	35
KCNH2	Long QT syndrome	7:150648643	152427	1838C>T	rs199473524	27	126	125	42	15	86		LDLR	Hypercholesterolaemia	19.1123	606945	2053C>A	NA	4	22	219	39	33	35
KCNH2	Long QT syndrome	7:150648664	152427	1817C>T	NA	89	184	186	10	23	110		LDLR	Hypercholesterolaemia	19.1123	606945	2054delC	NA	4	24	219	35	33	39
KCNH2	Long QT syndrome 2	7:150648665	152427	1816T>C	rs199473523	79	212	133	5	18	128		LDLR	Hypercholesterolaemia	19.1123	606945	2054C>T	rs28942084	4	24	219	35	33	39
KCNH2	Long QT syndrome	7:1506487	152427	1781G>A	rs199472931	10	52	286	45	29	73		LDLR	Hypercholesterolaemia	19.1123	606945	2055_2068delGCAGATCAACCCCC	NA	4	31	218	33	31	36
KCNH2	Long QT syndrome	7:150648703	152427	1778T>G	rs28928904	3	12	68	23	25	48		LDLR	Hypercholesterolaemia	19.1123	606945	2055delG	NA	4	31	218	33	31	36
KCNH2	Long QT syndrome	7:150648703	152427	1778T>A	rs28928904	3	12	68	23	25	48		LDLR	Hypercholesterolaemia	19.1123	606945	2056C>T	NA	15	87	282	73	24	92
KCNH2	Long QT syndrome 2	7:150648704	152427	1777A>G	rs199472930	88	104	15	27	29	71		LDLR	Hypercholesterolaemia	19.1123	606945	2056_2068delCAGATCAACCCCC	NA	15	87	282	73	24	92
KCNH2	Long QT syndrome	7:150648706	152427	1775delA	NA	94	101	13	25	28	67		LMNA	Atrial fibrillation	1.1561	150330	832G>A	NA	109	96	233	48	16	185
KCNH2	Long QT syndrome 2	7:150648712	152427	1769G>T	rs199472929	160	134	96	9	27	86		LMNA	Muscular dystrophy, limb girdle	1.15611	150330	851T>C	NA	91	87	235	44	19	202
KCNH2	Short QT syndrome	7:150648717	152427	1764C>A	rs104894021	256	220	361	4	30	120		LMNA	Muscular dystrophy, Emery-Dreifuss	1.15611	150330	907T>C	rs61527854	60	42	272	64	19	67
KCNH2	Short QT syndrome	7:150648717	152427	1764C>G	rs104894021	256	220	361	4	30	120		LMNA	Cardiomyopathy, dilated	1.15611	150330	936+1G>T	NA	69	65	300	74	14	73
KCNH2	Long QT syndrome	7:150648719	152427	1762A>G	rs199473431	259	221	352	4	28	123		LMNA	Cardiac abnormalities with/without skeletal muscle compromise	1.15611	150330	937-11C>G	NA	73	66	316	83	16	73
KCNH2	Long QT syndrome 2	7:150648725	152427	1756C>A	NA	266	229	373	4	30	129		LMNA	Cardiomyopathy, dilated	1.15611	150330	949G>A	rs56816490	107	72	376	133	12	80
KCNH2	Long QT syndrome	7:150648726	152427	1755G>T	rs199473430	214	297	274	5	26	145		LMNA	Cardiomyopathy, dilated	1.15611	150330	952G>A	NA	106	77	385	138	13	81
KCNH2	Long QT syndrome	7:15064873	152427	1751G>T	rs199473429	127	176	61	5	30	89		LMNA	Cardiomyopathy, dilated	1.15611	150330	958delC	NA	104	78	393	137	16	73
KCNH2	Long QT syndrome 2	7:150648731	152427	1750G>T	rs199473428	127	143	90	6	25	67		LMNA	Cardiomyopathy, dilated	1.15611	150330	1086delT	NA	32	102	27	41	18	80
KCNH2	Long QT syndrome	7:150648731	152427	1750G>C	rs199473428	127	143	90	6	25	67		LMNA	Cardiomyopathy, dilated	1.15611	150330	1114delG	NA	134	98	216	33	18	82
KCNH2	Long QT syndrome	7:150648731	152427	1750G>A	rs199473428	127	143	90	6	25	67		LMNA	Muscular dystrophy, limb girdle	1.15611	150330	1126T>A	NA	135	94	206	30	19	82
KCNH2	Long QT syndrome	7:150648737	152427	1744C>T	rs121912508	63	112	219	19	18	92		LMNA	Muscular dystrophy, limb girdle	1.15611	150330	1129C>T	NA	133	86	198	33	19	85
KCNH2	Long QT syndrome	7:150648739	152427	1742C>A	NA	79	109	242	23	16	77		LMNA	Muscular dystrophy, limb girdle	1.15611	150330	1135C>T	NA	171	90	318	29	17	105
KCNH2	Long QT syndrome	7:150648745	152427	1736T>C	rs199473425	100	102	251	22	17	75		LMNA	Muscular dystrophy	1.15611	150330	1139T>C	rs121912495	165	84	304	31	17	99
KCNH2	Long QT syndrome 2	7:150648761	152427	1720A>G	rs199473667	69.08	129.75	362.75	18.92	22.42	93.33		LMNA	Cardiac conduction system disease	1.15611	150330	1142delA	NA	164	88	315	30	18	101
KCNH2	Long QT syndrome	7:150648766	152427	1715G>A	rs199473423	8	63	103	38	24	56		LMNA	Muscular dystrophy, Emery-Dreifuss	1.15611	150330	1162C>T	NA	131	73	200	29	17	94
KCNH2	Long QT syndrome	7:150648766	152427	1715G>T	rs199473423	8	63	103	38	24	56		LMNA	Cardiomyopathy, dilated	1.15611	150330	1163G>A	NA	129	76	183	28	16	90
KCNH2	Long QT syndrome	7:150648767	152427	1714G>T	rs9333649	13	56	111	34	22	54		LMNA	Metabolic laminopathy	1.15611	150330	1184C>T	NA	128	77	184	28	18	89
KCNH2	Long QT syndrome	7:150648767	152427	1714G>C	rs9333649	13	56	111	34	22	54		LMNA	Cardiomyopathy, dilated	1.15611	150330	1189C>T	NA	143	78	164	28	17	85
KCNH2	Long QT syndrome	7:150648767	152427	1714G>A	rs9333649	13	56	111	34	22	54		LMNA	Partial lipodystrophy, type 2	1.15611	150330	1195C>T	rs58672172	143	80	167	28	18	84
KCNH2	Long QT syndrome	7:15064877	152427	1711A>C	rs199472928	18	52	97	33	23	56		LMNA	Metabolic laminopathy	1.15611	150330	1196G>A	NA	146	85	176	29	19	78
KCNH2	Long QT syndrome	7:15064877	152427	1711A>G	rs199472928	18	52	97	33	23	56		LMNA	Muscular dystrophy, Emery-Dreifuss	1.15611	150330	1201C>T	rs61094188	144	83	174	30	18	77
KCNH2	Long QT syndrome	7:150648775	152427	1706A>G	NA	19	53	95	34	22	56		LMNA	Atrial fibrillation	1.15611	150330	1462A>C	NA	29	1	0	1	25	37
KCNH2	Long QT syndrome	7:150648826	152427	1655T>C	rs199472918	10	54	107	17	24	39		LMNA	Cardiomyopathy, dilated	1.15611	150330	1489-1G>T	NA	22	225	236	44	19	217
KCNH2	Long QT syndrome	7:150648872	152427	1609C>T	rs199472917	16	67	117	15	25	41		LMNA	Muscular dystrophy, Emery-Dreifuss	1.15611	150330	1492T>C	NA	23	232	217	36	17	226
KCNH2	Long QT syndrome 2	7:150648878	152427	1603G>A	NA	15	67	124	16	27	46		LMNA	Myopathy, early-onset and progeria	1.15611	150330	1494G>T	rs57730570	23	233	212	33	17	229
KCNH2	Long QT syndrome	7:15064888	152427	1601G>T	rs199473516	17	79	122	18	30	50		LMNA	Cardiomyopathy, dilated	1.15611	150330	1495delG	NA	27	219	200	31	19	215
KCNH2	Long QT syndrome	7:150648881	152427	1600C>T	rs199472916	20	79	120	18	32	56		LMNA	Metabolic syndrome, association with	1.15611	150330	1698C>T	rs4641	69	52	220	47	17	70
KCNH2	Long QT syndrome	7:150648889	152427	1592G>A	rs199473515	20	78	114	18	31	54		MEN1	Multiple endocrine neoplasia 1	11.6457	613733	1676delA	NA	15	33	180	122	32	50
KCNH2	Long QT syndrome	7:150649568	152427	1502A>G	rs199473513	42	64	87	14	13	75		MEN1	Multiple endocrine neoplasia 1	11.6457	613733	1675A>T	NA	13	31	216	121	31	58
KCNH2	Long QT syndrome	7:150649569	152427	1501G>C	rs199472912	58	69	208	23	17	122		MEN1	Multiple endocrine neoplasia 1	11.6457	613733	1674dupG	NA	13	31	216	121	31	58
KCNH2	Long QT syndrome	7:150649569	152427	1501G>A	rs199472912	58	69	208	23	17	122		MEN1	Multiple endocrine neoplasia 1	11.6457	613733	1673T>A	NA	12	33	208	121	34	54
KCNH2	Long QT syndrome	7:150649644	152427	1426G>A	rs199472908	64	61	228	27	19	86		MEN1	Multiple endocrine neoplasia 1	11.6457	613733	1672delA	NA	12	32	208	114	33	54
KCNH2	Long QT syndrome	7:150649646	152427	1424A>G	rs199472907	13	133	180	42	17	74		MEN1	Multiple endocrine neoplasia 1	11.6457	613733	1670_1672delAGA	NA	12	32	208	114	33	54
KCNH2	Long QT syndrome	7:150649649	152427	1421C>T	rs199472906	18	123	206	42	18	77		MEN1	Multiple endocrine neoplasia 1	11.6457	613733	1526delG	NA	14	18	230	37	36	43
KCNH2	Long QT syndrome	7:150649652	152427	1418C>A	rs199472905	18	124	202	42	18	77		MEN1	Multiple endocrine neoplasia 1	11.6457	613733	1525_1526insC	NA	14	18	230	37	36	43
KCNH2	Long QT syndrome	7:150649653	152427	1417A>C	rs199473512	19	116	199	44	19	80		MEN1	Multiple endocrine neoplasia 1	11.6457	613733	1280G>T	NA	97	98	260	112	19	88
KCNH2	Long QT syndrome	7:150649656	152427	1414delC	NA	23	115	208	43	19	75		MEN1	Multiple endocrine neoplasia 1	11.6457	613733	1192delC	NA	16	42	121	44	29	47
KCNH2	Long QT syndrome	7:150649662	152427	1408A>G	rs121912505	22	113	204	42	19	75		MEN1	Multiple endocrine neoplasia 1	11.6457	613733	1192C>T	NA	16	42	121	44	29	47
KCNH2	Long QT syndrome	7:150649722	152427	1348C>T	NA	81	161	116	12	18	105		MEN1	Multiple endocrine neoplasia 1	11.6457	613733	1186-1G>A	NA	17	42	122	47	26	47
KCNH2	Long QT syndrome	7:150649728	152427	1342G>A	NA	64	116	110	35	17	85		MEN1	Multiple endocrine neoplasia 1	11.6457	613733	1053C>G	NA	14	70	227	90	21	64
KCNH2	Long QT syndrome	7:150649729	152427	1341C>A	NA	123	234	124	18	11	171		MEN1	Hyperparathyroidism	11.6457	613733	1051T>A	NA	15	67	238	88	20	70
KCNH2	Long QT syndrome	7:150649738	152427	1332G>T	rs9770044	109	216	105	21	13	152		MEN1	Multiple endocrine neoplasia 1	11.6457	613733	1050dupC	NA	15	67	238	88	20	70
KCNH2	Long QT syndrome	7:150649784	152427	1286delC	NA	100	162	438	65	19	117		MEN1	Multiple endocrine neoplasia 1	11.6457	613733	1051T>C	NA	15	67	238	88	20	70
KCNH2	Long QT syndrome	7:150649787	152427	1283C>A	NA	106	156	436	71	19	119		MEN1	Multiple endocrine neoplasia 1	11.6457	613733	1050-1G>A	NA	10	67	245	88	18	64
KCNH2	Long QT syndrome	7:150649787	152427	1283C>T	rs199472899	106	156	436	71	19	119		MEN1	Multiple endocrine neoplasia 1	11.6457	613733	1050-1G>T	NA	10	67	245	88	18	64
KCNH2	Long QT syndrome	7:150649809	152427	1261delA	NA	16	67	295	40	29	66		MEN1	Multiple endocrine neoplasia 1	11.6457	613733	1050-2A>G	NA	7	68	245	88	18	65
KCNH2	Long QT syndrome	7:150649811	152427	1259A>G	rs199473507	15	65	264	28	26	69		MEN1	Multiple endocrine neoplasia 1	11.6457	613733	1049+5G>A	NA	5	49	215	83	18	65
KCNH2	Long QT syndrome	7:150649871	152427	1199T>A	rs199472891	13	114	359	49	30	75		MEN1	Hyperparathyroidism	11.6457	613733	1049+2_1049+5delTGAG	NA	5	49	215	83	18	65
KCNH2	Long QT syndrome	7:150654379	152427	1128G>A	NA	148	215	123	14	31	139		MEN1	Multiple endocrine neoplasia 1	11.6457	613733	941G>C	NA	1	0	1	1	24	8
KCNH2	Long QT syndrome	7:150654411	152427	1096C>T	NA	12	35	74	68	32	33		MEN1	Multiple endocrine neoplasia 1	11.6457	613733	939T>G	NA	15	17	35	20	22	75
KCNH2	Long QT syndrome, drug-associated	7:150654482	152427	1025A>T	rs199472889	39	100	148	66	17	75		MEN1	Multiple endocrine neoplasia 1	11.6457	613733	933delC	NA	46	35	58	18	21	53
KCNH2	Long QT syndrome	7:15065454	152427	967G>A	rs199472887	24	58	97	43	18	133		MEN1	Multiple endocrine neoplasia 1	11.6457	613733	931A>C	NA	51.64	46.14	75.36	11.93	22.86	54.29
KCNH2	Long QT syndrome	7:150654548	152427	959C>A	NA	17	47	93	43	22	140		MEN1	Multiple endocrine neoplasia 1	11.6457	613733	925G>C	NA	55	50	76	10	24	56
KCNH2	Long QT syndrome	7:150654548	152427	959C>T	rs199472886	17	47	93	43	22	140		MEN1	Multiple endocrine neoplasia 1	11.6457	613733	923C>A	NA	63	53	101	10	21	66
KCNH2	Long QT syndrome	7:150654567	152427	940G>A	rs199473504	30	86	192	7	24	102		MEN1	Hyperparathyroidism	11.6457	613733	914G>A	NA	75	49	121	12	19	68
KCNH2	Long QT syndrome	7:150654573	152427	934C>T	rs199472885	74	142	340	18	32	128		MEN1	Multiple endocrine neoplasia 1	11.6457	613733	913-1G>C	NA	76	49	129	12	19	67
KCNH2	Long QT syndrome	7:150654578	152427	929delC	NA	74	153	375	17	33	125		MEN1	Multiple endocrine neoplasia 1	11.6457	613733	912+1G>C	NA	76	49	129	12	19	67
KCNH2	Long QT syndrome	7:150655515	152427	548delG	NA	121	160	109	29	15	81		MEN1	Multiple endocrine neoplasia 1	11.6457	613733	912+1G>A	NA	76	49	129	12	19	67
KCNH2	Long QT syndrome	7:150655557	152427	506delC	NA	11	32	24	1	19	44		MEN1	Multiple endocrine neoplasia 1	11.6457	613733	911delA	NA	81	50	122	10	18	67
KCNH2	Long QT syndrome	7:150655572	152427	491G>A	rs199472866	7	22	5	0	18	37		MEN1	Multiple endocrine neoplasia 1	11.6457	613733	902T>G	NA	81	50	124	10	18	70
KCNH2	Long QT syndrome	7:150655597	152427	473-7C>A	NA	6	22	7	0	22	41		MEN1	Multiple endocrine neoplasia 1	11.6457	613733	895delC	NA	81	52	116	12	18	71
KCNH2	Long QT syndrome	7:150656679	152427	453delC	NA	5	17	4	0	16	36		MEN1	Multiple endocrine neoplasia 1	11.6457	613733	893delC	NA	81	56	119	14	18	74
KCNH2	Long QT syndrome	7:150656686	152427	445_446insC	NA	2	6	4	0	26	21		MEN1	Multiple endocrine neoplasia 1	11.6457	613733	878delC	NA	88	63	132	13	20	83
KCNH2	Long QT syndrome	7:150656686	152427	446G>C	rs199472865	2	6	4	0	26	21		MEN1	Multiple endocrine neoplasia 1	11.6457	613733	857T>C	NA	95	67	134.67	18	16.67	83.33
KCNH2	Long QT syndrome	7:15065669	152427	442C>T	rs139544114	1.58	8.53	29.16	0	22.89	21.89		MEN1	Multiple endocrine neoplasia 1	11.6457	613733	851C>A	NA	96	65	141	18	16	85
KCNH2	Long QT syndrome	7:150656758	152427	374T>G	rs199473499	60	388	321	89	19	244		MEN1	Multiple endocrine neoplasia 1	11.6457	613733	843delG	NA	100	70.3	139.3	18.3	17.2	86.1
KCNH2	Long QT syndrome	7:150671808	152427	298C>G	rs121912515	55.4	224.8	169.8	35	19.6	158.8		MEN1	Multiple endocrine neoplasia 1	11.6457	613733	841G>C	NA	101	68	143	20	16	86
KCNH2	Long QT syndrome	7:150671808	152427	298C>T	rs121912515	55.4	224.8	169.8	35	19.6	158.8		MEN1	Multiple endocrine neoplasia 1	11.6457	613733	841G>A	NA	101	68	143	20	16	86
KCNH2	Long QT syndrome	7:15067182	152427	286A>G	rs199473496	31	156	109	17	21	101		MEN1	Hyperparathyroidism	11.6457	613733	830C>A	NA	100	69.33	137.33	17.33	17.67	83.67
KCNH2	Long QT syndrome	7:150671822	152427	284A>G	NA	31	138	96	17	19	94		MEN1	Multiple endocrine neoplasia 1	11.6457	613733	828C>A	NA	100	69	142	19	17	85
KCNH2	Long QT syndrome	7:150671825	152427	281T>G	rs199472852	40	142	198	38	18	105		MEN1	Multiple endocrine neoplasia 1	11.6457	613733	825-1G>C	NA	100	74	144	16	18	85
KCNH2	Long QT syndrome	7:150671865	152427	241C>T	NA	99	120	177	40	15	124		MEN1	Multiple endocrine neoplasia 1	11.6457	613733	825-2A>G	NA	103	73	141	19	18	91
KCNH2	Long QT syndrome	7:150671865	152427	234_241delTGCCGCGC	NA	99	120	177	40	15	124		MEN1	Multiple endocrine neoplasia 1	11.6457	613733	824+1G>A	NA	106	76	144	19	18	91
KCNH2	Sudden arrhythmic death syndrome	7:150671867	152427	239C>T	rs199473493	110	159	202	49	15	142		MEN1	Multiple endocrine neoplasia 1	11.6457	613733	824+1delG	NA	106	76	144	19	18	91
KCNH2	Long QT syndrome	7:150671868	152427	238G>C	rs199473037	115	160	227	54	17	151		MEN1	Hyperparathyroidism	11.6457	613733	824G>T	NA	108	76	148	19	19	91
KCNH2	Long QT syndrome 2	7:150671984	152427	122T>C	rs731506	2	1	0	0	26	9		MEN1	Multiple endocrine neoplasia 1	11.6457	613733	823delA	NA	111	79	157	18	16	93
KCNH2	Long QT syndrome	7:150671985	152427	121G>T	rs199472835	4	0	3	0	8	40		MEN1	Parathyroid tumour	11.6457	613733	821A>C	NA	108	78	152	17	15	92
KCNQ1	Long QT syndrome	11:259194	607542	560T>C	rs199473399	213	164	113	69	18	120		MEN1	Multiple endocrine neoplasia 1	11.6457	613733	811G>T	NA	110	82	151	18	14	96
KCNQ1	Long QT syndrome	11:2591945	607542	565G>A	rs104894252	72	60	25	6	30	96		MEN1	Multiple endocrine neoplasia 1	11.6457	613733	803_804delAT	NA	110	79	157	16	14	102
KCNQ1	Long QT syndrome	11:2591975	607542	595T>G	rs199472701	17	98	196	27	40	85		MEN1	Multiple endocrine neoplasia 1	11.6457	613733	804T>A	NA	110	79	157	16	14	102
KCNQ1	Long QT syndrome	11:2591984	607542	604G>C	rs199472702	19	97	199	26	39	82		MEN1	Multiple endocrine neoplasia 1	11.6457	613733	804T>G	NA	110	79	157	16	14	102
KCNQ1	Jervell and Lange-Nielsen syndrome	11:2591984	607542	604G>A	rs199472702	19	97	199	26	39	82		MEN1	Hyperparathyroidism	11.6457	613733	800T>C	NA	116	85	168	17	17	104
KCNQ1	Jervell and Lange-Nielsen syndrome	11:260886	607542	1189delC	NA	134	199	226	121	16	145		MEN1	Multiple endocrine neoplasia 1	11.6457	613733	798_800delGCT	NA	116	85	168	17	17	104
KCNQ1	Long QT syndrome	11:260886	607542	1189C>T	rs199472776	134	199	226	121	16	145		MEN1	Multiple endocrine neoplasia 1	11.6457	613733	795delG	NA	117	91	174	16	14	111
KCNQ1	Altered channel function	11:2869129	607542	1927G>A	rs1800172	15	148	141	180	26	130		MEN1	Multiple endocrine neoplasia 1	11.6457	613733	795G>A	NA	117	91	174	16	14	111
LDLR	Hypercholesterolaemia	19:11215929	606945	347_349delGCC	NA	67	114	98	113	19	75		MEN1	Multiple endocrine neoplasia 1	11.6457	613733	794G>A	NA	115	93	173	17	15	109
LDLR	Hypercholesterolaemia	19:11215929	606945	347G>T	NA	67	114	98	113	19	75		MEN1	Multiple endocrine neoplasia 1	11.6457	613733	791T>C	NA	113	93	168	17	14	109
LDLR	Hypercholesterolaemia	19:11216153	606945	571C>T	NA	1	0	3	0	40	48		MEN1	Multiple endocrine neoplasia 1	11.6457	613733	784A>T	NA	114	95	178	15	15	111
LDLR	Hypercholesterolaemia	19:1121616	606945	578delA	NA	2	0	0	0	43	10		MEN1	Multiple endocrine neoplasia 1	11.6457	613733	784-4_784delCTAGAinsTCAGCC	NA	114	95	178	15	15	111
LDLR	Hypercholesterolaemia	19:1121616	606945	578_584delACAGTAG	NA	2	0	0	0	43	10		MEN1	Multiple endocrine neoplasia 1	11.6457	613733	784-1G>C	NA	112	92	178	17	14	109
LDLR	Hypercholesterolaemia	19:11222198	606945	1069G>T	NA	19	99	462	60	38	95		MEN1	Multiple endocrine neoplasia 1	11.6457	613733	784-1G>A	NA	112	92	178	17	14	109
LDLR	Hypercholesterolaemia	19:11222198	606945	1069G>A	NA	19	99	462	60	38	95		MEN1	Multiple endocrine neoplasia 1	11.6457	613733	784-2A>G	NA	113	94	179	17	14	108
LDLR	Hypercholesterolaemia	19:11222199	606945	1070A>G	NA	18	98	465	58	44	89		MEN1	Adrenocortical tumour	11.6457	613733	784-9G>A	NA	113	94	179	17	14	108
LDLR	Hypercholesterolaemia	19:11222202	606945	1073G>A	NA	19	84	356	47	42	77		MEN1	Multiple endocrine neoplasia 1	11.6458	613733	783+1G>A	NA	110	94	180	18	16	106
LDLR	Hypercholesterolaemia	19:11222202	606945	1070_1073dupAGTG	NA	19	84	356	47	42	77		MEN1	Multiple endocrine neoplasia 1	11.6458	613733	783+1G>T	NA	110	94	180	18	16	106
LDLR	Hypercholesterolaemia	19:11222204	606945	1075C>T	NA	19	81	356	45	43	76		MEN1	Multiple endocrine neoplasia 1	11.6458	613733	783+1G>C	NA	110	94	180	18	16	106
LDLR	Hypercholesterolaemia	19:11224019	606945	1252G>T	NA	111	227	488	182	19	113		MEN1	Multiple endocrine neoplasia 1	11.6458	613733	781C>T	NA	113	91	177	18	16	104
LDLR	Hypercholesterolaemia	19:11224019	606945	1252G>A	NA	111	227	488	182	19	113		MEN1	Hyperparathyroidism	11.6458	613733	779A>C	NA	114	87	180	16	17	102
LDLR	Hypercholesterolaemia	19:11224318	606945	1466A>G	NA	61	0	11	11	15	178		MEN1	Multiple endocrine neoplasia 1	11.6458	613733	776_778delTGC	NA	117	88	180	16	17	103
LDLR	Hypercholesterolaemia	19:11224319	606945	1467C>G	NA	76	0	15	9	15	263		MEN1	Multiple endocrine neoplasia 1	11.6458	613733	778C>T	rs104894266	117	88	180	16	17	103
LDLR	Hypercholesterolaemia	19:1122432	606945	1468T>C	NA	91	0	13	9	17	302		MEN1	Multiple endocrine neoplasia 1	11.6458	613733	776T>C	NA	119	89	186	16	17	103
LDLR	Hypercholesterolaemia	19:1122432	606945	1468T>G	NA	91	0	13	9	17	302		MEN1	Multiple endocrine neoplasia 1	11.6458	613733	776T>G	NA	119	89	186	16	17	103
LDLR	Hypercholesterolaemia	19:11224321	606945	1469G>A	NA	100	0	15	8	17	320		MEN1	Multiple endocrine neoplasia 1	11.6458	613733	772C>T	NA	120	88	180	15	16	100
LDLR	Hypercholesterolaemia	19:11224322	606945	1470G>A	NA	143	1	22	16	16	490		MEN1	Multiple endocrine neoplasia 1	11.6458	613733	766C>T	NA	119	87	181	15	16	102
LDLR	Hypercholesterolaemia	19:11224326	606945	1474G>A	NA	60	11	74	4	19	233		MEN1	Hyperparathyroidism	11.6458	613733	763G>A	rs104894268	121	89	170	13	14	99
LDLR	Hypercholesterolaemia	19:11224326	606945	1474G>C	NA	60	11	74	4	19	233		MEN1	Parathyroid tumour	11.6458	613733	758C>G	NA	124	87	165	13	15	99
LDLR	Hypercholesterolaemia	19:11224327	606945	1475A>G	NA	47	15	77	1	18	167		MEN1	Multiple endocrine neoplasia 1	11.6458	613733	758C>A	NA	124	87	165	13	15	99
LDLR	Hypercholesterolaemia	19:1122433	606945	1478_1479delCT	NA	37	20	107	4	19	130		MEN1	Multiple endocrine neoplasia 1	11.6458	613733	758C>T	NA	124	87	165	13	15	99
LDLR	Hypercholesterolaemia	19:11224339	606945	1487G>T	NA	33	22	90	4	19	118		MEN1	Multiple endocrine neoplasia 1	11.6458	613733	757T>C	NA	121	91	168	11	15	104
LDLR	Hypercholesterolaemia	19:11224341	606945	1489A>C	NA	31.2	27.2	82	3	15	106.4		MEN1	Multiple endocrine neoplasia 1	11.6458	613733	738delC	NA	126	95	182	12	18	110
LDLR	Hypercholesterolaemia	19:11224344	606945	1492G>T	NA	32	30	80	3	15	114		MEN1	Hyperparathyroidism	11.6458	613733	734delC	NA	124	97	181	12	21	108
LDLR	Hypercholesterolaemia	19:11224347	606945	1495T>C	NA	31	29	78	3	14	104		MEN1	Multiple endocrine neoplasia 1	11.6458	613733	725C>T	NA	124	97	186	10	21	111
LDLR	Hypercholesterolaemia	19:11224355	606945	1503G>A	NA	30	32	67	3	13	90		MEN1	Multiple endocrine neoplasia 1	11.6458	613733	722G>T	NA	120	95	178	10	21	110
LDLR	Hypercholesterolaemia	19:11224356	606945	1504G>T	NA	27	31	50	2	13	76		MEN1	Multiple endocrine neoplasia 1	11.6458	613733	722G>A	NA	120	95	178	10	21	110
LDLR	Hypercholesterolaemia	19:11224362	606945	1510A>G	NA	21	26	30	0	18	64		MEN1	Multiple endocrine neoplasia 1	11.6458	613733	721T>C	NA	119	97	182	10	21	113
LDLR	Hypercholesterolaemia	19:11224362	606945	1510A>T	NA	21	26	30	0	18	64		MEN1	Multiple endocrine neoplasia 1	11.6458	613733	713delT	NA	118	97	185	10	21	110
LDLR	Hypercholesterolaemia	19:11224366	606945	1514G>A	NA	23	27	28	0	17	59		MEN1	Multiple endocrine neoplasia 1	11.6458	613733	703G>A	NA	112	102	159	10	22	108
LDLR	Hypercholesterolaemia	19:11224372	606945	1520A>C	NA	21	25	25	0	16	57		MEN1	Multiple endocrine neoplasia 1	11.6458	613733	686G>T	NA	102	88	155	9	21	102
LDLR	Hypercholesterolaemia	19:11224377	606945	1525A>G	NA	19	27	24	0	19	53		MEN1	Multiple endocrine neoplasia 1	11.6458	613733	686G>A	NA	102	88	155	9	21	102
LDLR	Hypercholesterolaemia	19:11224381	606945	1529C>T	NA	19	25	26	0	20	53		MEN1	Multiple endocrine neoplasia 1	11.6458	613733	681C>A	NA	105	99	165	7	22	100
LDLR	Hypercholesterolaemia	19:11226775	606945	1592T>A	NA	16	153	356	129	45	89		MEN1	Multiple endocrine neoplasia 1	11.6458	613733	681C>G	NA	105	99	165	7	22	100
LDLR	Hypercholesterolaemia	19:1122678	606945	1597T>C	NA	17	152	356	130	45	91		MEN1	Multiple endocrine neoplasia 1	11.6458	613733	677C>G	NA	104	96	161	7	23	97
LDLR	Hypercholesterolaemia	19:11226781	606945	1598G>A	NA	17	155	358	130	44	93		MEN1	Multiple endocrine neoplasia 1	11.6458	613733	676T>C	NA	98	94	151	7	20	95
LDLR	Hypercholesterolaemia	19:11226782	606945	1599G>A	NA	19	176	390	126	42	98		MEN1	Multiple endocrine neoplasia 1	11.6458	613733	673G>A	NA	100	94	160	5	24	90
LDLR	Hypercholesterolaemia	19:1122759	606945	1761C>G	NA	19	120	312	99	39	97		MEN1	Multiple endocrine neoplasia 1	11.6458	613733	670A>T	NA	100	94	162	4	22	90
LDLR	Hypercholesterolaemia	19:11227594	606945	1765G>A	rs201971888	19	121	277	92	39	88		MEN1	Multiple endocrine neoplasia 1	11.6458	613733	668T>C	NA	100	91	162	4	22	89
LDLR	Hypercholesterolaemia	19:11227666	606945	1837G>A	rs148181903	19	146	238	212	36	132		MEN1	Multiple endocrine neoplasia 1	11.6458	613733	668delT	NA	100	91	162	4	22	89
LDLR	Hypercholesterolaemia	19:11231095	606945	2037T>A	NA	18	144	202	159	23	108		MEN1	Multiple endocrine neoplasia 1	11.6458	613733	667delC	NA	98	94.5	160.5	4	22.5	91
LDLR	Hypercholesterolaemia	19:11231099	606945	2041_2042delTG	NA	17	137	196	158	21	101		MEN1	Multiple endocrine neoplasia 1	11.6458	613733	660G>A	NA	96	94	158	4	23	90
LDLR	Hypercholesterolaemia	19:11231099	606945	2041T>G	NA	17	137	196	158	21	101		MEN1	Multiple endocrine neoplasia 1	11.6458	613733	659G>A	NA	99	94	165	4	25	92
LDLR	Hypercholesterolaemia	19:112311	606945	2042G>A	NA	0	11	104	27	29	32		MEN1	Hyperparathyroidism	11.6458	613733	659G>T	NA	99	94	165	4	25	92
LDLR	Hypercholesterolaemia	19:112311	606945	2042G>C	rs201637900	0	11	104	27	29	32		MEN1	Multiple endocrine neoplasia 1	11.6458	613733	658_659insA	NA	99	94	165	4	25	92
LDLR	Hypercholesterolaemia	19:11231101	606945	2043C>A	rs121908031	2	18	104	32	34	30		MEN1	Multiple endocrine neoplasia 1	11.6458	613733	659G>C	NA	99	94	165	4	25	92
LDLR	Hypercholesterolaemia	19:11231101	606945	2043C>G	NA	2	18	104	32	34	30		MEN1	Multiple endocrine neoplasia 1	11.6458	613733	655-1G>T	NA	99	93	157	4	24	92
LDLR	Hypercholesterolaemia	19:11231103	606945	2045T>C	NA	2	18	106	33	34	33		MEN1	Multiple endocrine neoplasia 1	11.6458	613733	655-1G>C	NA	99	93	157	4	24	92
LDLR	Hypercholesterolaemia	19:11231108	606945	2050G>A	NA	2	21	155	34	33	34		MEN1	Multiple endocrine neoplasia 1	11.6458	613733	655-3A>G	NA	91	88	136	3	24	82
LDLR	Hypercholesterolaemia	19:11231108	606945	2050_2063delGCCCCGCAGATCAA	NA	2	21	155	34	33	34		MEN1	Multiple endocrine neoplasia 1	11.6458	613733	655-4delT	NA	91	88	136	3	24	82
LDLR	Hypercholesterolaemia	19:11231111	606945	2053C>T	rs2569548	2	28	204	39	33	38		MEN1	Multiple endocrine neoplasia 1	11.6458	613733	655-6C>T	rs77461664	90	86	127	3	24	79
LDLR	Hypercholesterolaemia	19:11231111	606945	2053C>A	NA	2	28	204	39	33	38		MEN1	Multiple endocrine neoplasia 1	11.6458	613733	655-6C>G	NA	90	86	127	3	24	79
LDLR	Hypercholesterolaemia	19:11231112	606945	2054delC	NA	2	33	194	35	33	43		MEN1	Multiple endocrine neoplasia 1	11.6458	613733	655-6C>A	NA	90	86	127	3	24	79
LDLR	Hypercholesterolaemia	19:11231112	606945	2054C>T	rs28942084	2	33	194	35	33	43		MEN1	Prolactinoma	11.6458	613733	655-7C>A	NA	87	88	126	3	22	76
LDLR	Hypercholesterolaemia	19:11231113	606945	2055_2068delGCAGATCAACCCCC	NA	2	38	192	34	31	41		MEN1	Multiple endocrine neoplasia 1	11.6458	613733	654+3A>G	NA	89	86	125	3	24	75
LDLR	Hypercholesterolaemia	19:11231113	606945	2055delG	NA	2	38	192	34	31	41		MEN1	Multiple endocrine neoplasia 1	11.6458	613733	654+1G>C	NA	89	89	128	3	22	77
LDLR	Hypercholesterolaemia	19:11231114	606945	2056C>T	NA	9	105	274	56	24	94		MEN1	Multiple endocrine neoplasia 1	11.6458	613733	654+1G>A	NA	89	89	128	3	22	77
LDLR	Hypercholesterolaemia	19:11231114	606945	2056_2068delCAGATCAACCCCC	NA	9	105	274	56	24	94		MEN1	Multiple endocrine neoplasia 1	11.6458	613733	654+1G>T	NA	89	89	128	3	22	77
LDLR	Hypercholesterolaemia	19:11231126	606945	2068delC	NA	14	125	313	79	33	102		MEN1	Multiple endocrine neoplasia 1	11.6458	613733	654G>T	NA	88	83	123	2	22	74
LDLR	Hypercholesterolaemia	19:11231126	606945	2068C>G	NA	14	125	313	79	33	102		MEN1	Multiple endocrine neoplasia 1	11.6458	613733	643G>A	NA	85	82	110	3	20	74
LDLR	Hypercholesterolaemia	19:11231138	606945	2080T>G	NA	14	124	319	81	33	103		MEN1	Multiple endocrine neoplasia 1	11.6458	613733	641delG	NA	83	83	123	3	22	75
LDLR	Hypercholesterolaemia	19:11231146	606945	2088C>G	NA	19	121	239	83	32	106		MEN1	Multiple endocrine neoplasia 1	11.6458	613733	625delC	NA	77	71	116	3	23	70
LDLR	Hypercholesterolaemia	19:11231146	606945	2088C>A	NA	19	121	239	83	32	106		MEN1	Multiple endocrine neoplasia 1	11.6458	613733	625C>T	NA	77	71	116	3	23	70
LDLR	Hypercholesterolaemia	19:11231147	606945	2089G>C	NA	17.92	118.25	228.5	79.33	31.83	89.42		MEN1	Multiple endocrine neoplasia 1	11.6458	613733	609delC	NA	79	73	127	3	22	70
LDLR	Hypercholesterolaemia	19:1123115	606945	2092T>C	NA	18	115	232	78	33	92		MEN1	Multiple endocrine neoplasia 1	11.6458	613733	605delG	NA	78	71	117	3	24	68
LDLR	Hypercholesterolaemia	19:1123115	606945	2092delT	NA	18	115	232	78	33	92		MEN1	Multiple endocrine neoplasia 1	11.6458	613733	602delA	NA	79	72	116	3	23	70
LDLR	Hypercholesterolaemia	19:11231151	606945	2093G>A	NA	18	117	235	79	33	87		MEN1	Multiple endocrine neoplasia 1	11.6458	613733	600_601dupCA	NA	79	72	116	3	23	70
LDLR	Hypercholesterolaemia	19:11231151	606945	2093G>T	NA	18	117	235	79	33	87		MEN1	Multiple endocrine neoplasia 1	11.6458	613733	594G>A	rs104894257	81	67	116	3	27	69
LDLR	Hypercholesterolaemia	19:11231152	606945	2094C>G	NA	18	118	223	82	32	86		MEN1	Multiple endocrine neoplasia 1	11.6458	613733	593G>A	rs104894258	81	67	116	3	27	69
LDLR	Hypercholesterolaemia	19:11231154	606945	2096C>T	rs201573863	17	115	221	80	31	85		MEN1	Hyperparathyroidism	11.6458	613733	590C>T	NA	79	67	118	2	28	67
LDLR	Hypercholesterolaemia	19:11231156	606945	2098G>A	NA	17	113	196	82	32	85		MEN1	Multiple endocrine neoplasia 1	11.6458	613733	584A>G	NA	77	68	107	2	28	66
LDLR	Hypercholesterolaemia	19:11231157	606945	2099A>G	NA	17	114	194	82	32	83		MEN1	Multiple endocrine neoplasia 1	11.6458	613733	578C>T	NA	73	71	93	2	26	66
LDLR	Hypercholesterolaemia	19:11231158	606945	2100C>G	NA	16	114	181	82	29	83		MEN1	Hyperparathyroidism	11.6458	613733	574C>T	NA	72	71	100	2	27	65
LDLR	Hypercholesterolaemia	19:11231159	606945	2101G>A	NA	17	115	181	82	30	83		MEN1	Hyperparathyroidism	11.6458	613733	570_571delGGinsC	NA	68	69	99	2	25	66
LMNA	Cardiomyopathy, dilated & cardiac conduction disease	1:156084815	150330	106C>T	NA	19	237	367	102	28	152		MEN1	Multiple endocrine neoplasia 1	11.6458	613733	571delG	NA	68	69	99	2	25	66
LMNA	Atrial fibrillation	1:156104999	150330	832G>A	NA	98	124	234	45	16	167		MEN1	Multiple endocrine neoplasia 1	11.6458	613733	571G>T	NA	68	69	99	2	25	66
LMNA	Muscular dystrophy, limb girdle	1:156105018	150330	851T>C	NA	85	111	241	43	19	182		MEN1	Hyperparathyroidism	11.6458	613733	563C>T	rs199706698	59.75	65.75	92.25	2	24.25	65.25
LMNA	Muscular dystrophy, Emery-Dreifuss	1:156105074	150330	907T>C	rs61527854	57	58	255	47	19	58		MEN1	Multiple endocrine neoplasia 1	11.6458	613733	558delT	NA	56	63	95	2	26	68
LMNA	Cardiomyopathy, dilated	1:156105104	150330	936+1G>T	NA	59	84	278	50	14	62		MLH1	Colorectal cancer, non-polyposis	3.37038	120436	119delT	NA	73	59	198	37	17	255
LMNA	Cardiac abnormalities with/without skeletal muscle compromise	1:156105681	150330	937-11C>G	NA	61	85	302	59	16	62		MLH1	Colorectal cancer, non-polyposis	3.37038	120436	121G>C	rs267607713	73	59	198	37	17	255
LMNA	Cardiomyopathy, dilated	1:156105704	150330	949G>A	rs56816490	94	103	367	113	12	72		MLH1	Colorectal cancer, non-polyposis	3.37038	120436	122A>G	rs63751094	68	50	181	27	17	217
LMNA	Cardiomyopathy, dilated	1:156105707	150330	952G>A	NA	92	109	374	118	13	72		MLH1	Colorectal cancer, non-polyposis	3.37038	120436	122A>G	rs63751094	68	50	181	27	17	217
LMNA	Cardiomyopathy, dilated	1:156105713	150330	958delC	NA	85	107	379	121	16	65		MLH1	Colorectal cancer, non-polyposis	3.37038	120436	122_123delATinsTA	NA	68	50	181	27	17	217
LMNA	Cardiomyopathy, dilated	1:156105841	150330	1086delT	NA	27	115	32	38	18	68		MLH1	Colorectal cancer, non-polyposis	3.37042	120436	218T>C	NA	128	110	413	71	17	101
LMNA	Cardiomyopathy, dilated	1:156105869	150330	1114delG	NA	116	129	243	30	18	77		MLH1	Colorectal cancer, non-polyposis	3.37042	120436	229T>C	rs63749859	130	111	410	69	18	100
LMNA	Muscular dystrophy, limb girdle	1:156105881	150330	1126T>A	NA	117	126	232	29	19	76		MLH1	Colorectal cancer, non-polyposis	3.37042	120436	261delC	rs267607728	95	72	199	46	19	74
LMNA	Muscular dystrophy, limb girdle	1:156105884	150330	1129C>T	NA	117	124	235	28	19	75		MLH1	Colorectal cancer, non-polyposis	3.37043	120436	265G>T	rs11541859	84	64	185	42	18	74
LMNA	Muscular dystrophy, limb girdle	1:15610589	150330	1135C>T	NA	134	116	308	30	17	101		MLH1	Gastric cancer	3.37043	120436	274G>C	rs63750133	82	62	186	42	18	74
LMNA	Muscular dystrophy	1:156105894	150330	1139T>C	rs121912495	129	111	287	29	17	92		MLH1	Colorectal cancer, non-polyposis	3.37043	120436	277A>G	rs41295282	75	68	127	48	17	75
LMNA	Cardiac conduction system disease	1:156105897	150330	1142delA	NA	128	113	299	28	18	92		MLH1	Colorectal cancer, non-polyposis	3.37043	120436	277_278delAG	NA	75	68	127	48	17	75
LMNA	Muscular dystrophy, Emery-Dreifuss	1:156106003	150330	1158-2A>G	NA	119	99	210	19	22	76		MLH1	Colorectal cancer, young-onset	3.37043	120436	291T>G	NA	74	71	133	51	16	76
LMNA	Metabolic laminopathy	1:156106006	150330	1159C>G	NA	110	103	188	15	21	73		MLH1	Colorectal cancer, non-polyposis	3.37043	120436	292G>C	rs267607725	49.3	79	94.5	64.8	16.4	85.9
LMNA	Muscular dystrophy, Emery-Dreifuss	1:156106009	150330	1162C>T	NA	112	98	188	15	17	74		MLH1	Colorectal cancer, non-polyposis	3.37043	120436	292G>A	rs267607725	49.3	79	94.5	64.8	16.4	85.9
LMNA	Cardiomyopathy, dilated	1:15610601	150330	1163G>A	NA	108	104	167	15	16	74		MLH1	Colorectal cancer	3.37043	120436	299G>C	rs63750266	31	84	67	66	16	85
LMNA	Metabolic laminopathy	1:156106031	150330	1184C>T	NA	106	105	173	17	18	72		MLH1	Colorectal cancer, non-polyposis	3.37043	120436	301G>A	rs267607726	33	78	62	68	17	90
LMNA	Cardiomyopathy, dilated	1:156106036	150330	1189C>T	NA	121	100	158	17	17	68		MLH1	Colorectal cancer, non-polyposis	3.37043	120436	302G>A	rs267607727	30.6	77.13	54.07	62.73	18.67	88.8
LMNA	Partial lipodystrophy, type 2	1:156106042	150330	1195C>T	rs58672172	120	102	164	16	18	67		MLH1	Colorectal cancer, non-polyposis	3.37043	120436	304G>A	rs63750453	32	79	59	65	18	89
LMNA	Metabolic laminopathy	1:156106043	150330	1196G>A	NA	125	103	161	15	19	63		MLH1	Colorectal cancer, non-polyposis	3.37043	120436	306+3A>C	rs267607731	107	94	67	130	19	101
LMNA	Muscular dystrophy, Emery-Dreifuss	1:156106048	150330	1201C>T	rs61094188	124	102	156	14	18	61		MLH1	Colorectal cancer, non-polyposis	3.37043	120436	306+4A>G	rs267607733	115	91	66	138	16	109
LMNA	Metabolic disease	1:156106079	150330	1232G>A	NA	121	99	156	15	20	62		MLH1	Colorectal cancer, non-polyposis	3.37043	120436	306+5G>A	rs267607735	100	94	70	122	17	114
LMNA	Metabolic laminopathy	1:156106109	150330	1262T>C	NA	115	98	170	19	24	62		MLH1	Colorectal cancer, non-polyposis	3.37046	120436	307-2A>C	rs267607732	103	98	68	124	16	115
LMNA	Muscular dystrophy, limb girdle	1:156106217	150330	1370delA	NA	130	192	346	19	28	153		MLH1	Colorectal cancer, non-polyposis	3.37046	120436	307-1G>C	rs267607736	106	100	84	116	18	117
LMNA	Cardiomyopathy, dilated & cardiac conduction disease	1:156106228	150330	1380+1G>A	NA	123	190	332	17	28	156		MLH1	Colorectal cancer, non-polyposis	3.37046	120436	311delT	NA	98	99	79	118	17	114
LMNA	Atrial fibrillation	1:156106793	150330	1462A>C	NA	25	1	0	1	25	36		MLH1	Gastric cancer	3.37046	120436	318C>G	rs63750297	95	105	105	118	18	107
LMNA	Cardiomyopathy, dilated	1:156106903	150330	1489-1G>T	NA	30	283	198	40	19	180		MLH1	Colorectal cancer, non-polyposis	3.37046	120436	318C>A	NA	95	105	105	118	18	107
LMNA	Muscular dystrophy, Emery-Dreifuss	1:156106907	150330	1492T>C	NA	26	294	170	29	17	185		MLH1	Colorectal cancer, non-polyposis	3.37046	120436	320T>G	rs63750507	93	109	130	116	15	102
LMNA	Myopathy, early-onset and progeria	1:156106909	150330	1494G>T	rs57730570	26	295	167	29	17	185		MLH1	Colorectal cancer, non-polyposis	3.37046	120436	364G>T	NA	32	113	178	57	19	117
LMNA	Cardiomyopathy, dilated	1:15610691	150330	1495delG	NA	30	282	153	30	19	176		MLH1	Colorectal cancer, non-polyposis	3.37046	120436	367A>T	rs63750542	24	90	99	45	18	108
LMNA	Metabolic syndrome, association with	1:156107534	150330	1698C>T	rs4641	61	68	197	43	17	67		MLH1	Colorectal cancer, non-polyposis	3.37046	120436	376T>A	rs200076893	23	90	101	44	16	105
MEN1	Multiple endocrine neoplasia 1	11:64571963	613733	1676delA	NA	14	42	166	117	32	40		MLH1	Colorectal cancer, non-polyposis	3.37046	120436	378C>G	rs63751606	14	88	96	35	16	105
MEN1	Multiple endocrine neoplasia 1	11:64571964	613733	1675A>T	NA	13	41	194	119	31	47		MLH1	Colorectal cancer, non-polyposis	3.37046	120436	378delC	rs63751607	14	88	96	35	16	105
MEN1	Multiple endocrine neoplasia 1	11:64571964	613733	1674dupG	NA	13	41	194	119	31	47		MLH1	Colorectal cancer	3.37046	120436	378C>A	NA	14	88	96	35	16	105
MEN1	Multiple endocrine neoplasia 1	11:64571966	613733	1673T>A	NA	12	46	195	117	34	45		MLH1	Colorectal cancer, non-polyposis	3.37046	120436	380G>A	rs63751595	14	86	103	37	18	112
MEN1	Multiple endocrine neoplasia 1	11:64571967	613733	1672delA	NA	10	43	194	110	33	45		MLH1	Colorectal cancer, non-polyposis	3.37046	120436	380+1G>A	rs267607745	14	83	106	35	18	108
MEN1	Multiple endocrine neoplasia 1	11:64571967	613733	1670_1672delAGA	NA	10	43	194	110	33	45		MLH1	Colorectal cancer, non-polyposis	3.3705	120436	493delG	NA	35	39	17	36	26	310
MEN1	Multiple endocrine neoplasia 1	11:64572113	613733	1526delG	NA	13	29	241	34	36	40		MLH1	Colorectal cancer, non-polyposis	3.37053	120436	586A>T	rs63750500	147	88.33	107.67	58.17	19.5	69.17
MEN1	Multiple endocrine neoplasia 1	11:64572113	613733	1525_1526insC	NA	13	29	241	34	36	40		MLH1	Colorectal cancer	3.37053	120436	588+1G>T	rs267607772	140	83	92	63	19	74
MEN1	Multiple endocrine neoplasia 1	11:64572161	613733	1477_1478delCCinsG	NA	14	161	160	92	22	99		MLH1	Colorectal cancer, non-polyposis	3.37053	120436	588+1delG	rs267607773	140	83	92	63	19	74
MEN1	Multiple endocrine neoplasia 1	11:64572161	613733	1478delC	NA	14	161	160	92	22	99		MLH1	Colorectal cancer, non-polyposis	3.37053	120436	588+2T>C	NA	142	78	98	61	17	78
MEN1	Multiple endocrine neoplasia 1	11:64572576	613733	1280G>T	NA	81	150	215	102	19	79		MLH1	Colorectal cancer, non-polyposis	3.37053	120436	588+2T>A	NA	142	78	98	61	17	78
MEN1	Multiple endocrine neoplasia 1	11:64572643	613733	1213C>T	NA	15	74	189	41	27	57		MLH1	Colorectal cancer, non-polyposis	3.37053	120436	589-2A>G	rs267607767	129	86	73	57	19	97
MEN1	Multiple endocrine neoplasia 1	11:64572664	613733	1192delC	NA	12	61	137	47	29	41		MLH1	Colorectal cancer, non-polyposis	3.37054	120436	647T>G	rs267607776	97	101	65	43	19	121
MEN1	Multiple endocrine neoplasia 1	11:64572664	613733	1192C>T	NA	12	61	137	47	29	41		MLH1	Colorectal cancer, non-polyposis	3.37054	120436	649C>T	rs4986984	94	105	74	45.25	19.75	123
MEN1	Multiple endocrine neoplasia 1	11:64572671	613733	1186-1G>A	NA	14	66	145	50	26	44		MLH1	Colorectal cancer, non-polyposis	3.37054	120436	655A>G	rs1799977	93	108	77	46	19	122
MEN1	Multiple endocrine neoplasia 1	11:64573109	613733	1183C>T	NA	16	65	168	47	25	43		MLH1	Colorectal cancer, non-polyposis	3.37056	120436	693delT	rs63750764	212	172	365	89	19	238
MEN1	Multiple endocrine neoplasia 1	11:64573239	613733	1053C>G	NA	14	75	193	77	21	55		MLH1	Colorectal cancer, non-polyposis	3.37056	120436	701A>G	rs63750696	210	176	364	84	17	241
MEN1	Hyperparathyroidism	11:64573241	613733	1051T>A	NA	15	74	201	78	20	59		MLH1	Colorectal cancer, non-polyposis	3.37056	120436	717C>A	rs63749901	211	178	370	82	19	243
MEN1	Multiple endocrine neoplasia 1	11:64573241	613733	1050dupC	NA	15	74	201	78	20	59		MLH1	Colorectal cancer, non-polyposis	3.37056	120436	731G>A	rs63750303	211	178	337	83	18	233
MEN1	Multiple endocrine neoplasia 1	11:64573241	613733	1051T>C	NA	15	74	201	78	20	59		MLH1	Colorectal cancer, non-polyposis	3.37056	120436	731G>T	rs63750303	211	178	337	83	18	233
MEN1	Multiple endocrine neoplasia 1	11:64573243	613733	1050-1G>A	NA	11	73	213	82	18	56		MLH1	Colorectal cancer, non-polyposis	3.37059	120436	877T>G	NA	102	143	150	40	19	134
MEN1	Multiple endocrine neoplasia 1	11:64573243	613733	1050-1G>T	NA	11	73	213	82	18	56		MLH1	Colorectal cancer, non-polyposis	3.37059	120436	884+3A>G	rs267607803	89.5	109.5	150.5	45.5	19	125.5
MEN1	Multiple endocrine neoplasia 1	11:64573244	613733	1050-2A>G	NA	7	72	215	85	18	58		MLH1	Colorectal cancer, non-polyposis	3.37062	120436	887dupT	NA	80	109	150	45	18	122
MEN1	Multiple endocrine neoplasia 1	11:64573699	613733	1049+5G>A	NA	5	57	190	79	18	57		MLH1	Colorectal cancer, non-polyposis	3.37062	120436	885-9_887dupTCCTGACAGTTT	NA	80	109	150	45	18	122
MEN1	Hyperparathyroidism	11:64573699	613733	1049+2_1049+5delTGAG	NA	5	57	190	79	18	57		MLH1	Colorectal cancer, non-polyposis	3.37062	120436	887T>G	rs63750547	80	109	150	45	18	122
MEN1	Multiple endocrine neoplasia 1	11:64573812	613733	941G>C	NA	2	0	0	1	24	5		MLH1	Colorectal cancer, non-polyposis	3.37062	120436	888delA	rs267607809	8	85	153	34	24	346
MEN1	Multiple endocrine neoplasia 1	11:64573814	613733	939T>G	NA	15	29	34	13	22	58		MLH1	Colorectal cancer, non-polyposis	3.37062	120436	889G>T	rs63750736	8	82	163	35	25	344
MEN1	Multiple endocrine neoplasia 1	11:64573817	613733	936C>G	NA	22	45	33	17	25	57		MLH1	Colorectal cancer, non-polyposis	3.37062	120436	901C>T	rs63750489	9	80	159	33	25	345
MEN1	Multiple endocrine neoplasia 1	11:64573817	613733	936C>A	NA	22	45	33	17	25	57		MLH1	Colorectal cancer, non-polyposis	3.37062	120436	908T>A	rs267607813	9	81	155	40	32	362
MEN1	Multiple endocrine neoplasia 1	11:6457382	613733	933delC	NA	39	50	43	15	21	51		MLH1	Colorectal cancer, early onset	3.37062	120436	911A>G	NA	10	84	176	37	33	369
MEN1	Multiple endocrine neoplasia 1	11:64573822	613733	931A>C	NA	41.14	63.14	64.21	11.79	22.86	52.43		MLH1	Colorectal cancer, non-polyposis	3.37062	120436	911A>T	rs63750993	10	84	176	37	33	369
MEN1	Multiple endocrine neoplasia 1	11:64573828	613733	925G>C	NA	44	70	66	12	24	54		MLH1	Colorectal cancer, non-polyposis	3.37062	120436	949C>A	rs267607814	10.33	102.67	227.33	48.33	32.33	425
MEN1	Multiple endocrine neoplasia 1	11:6457383	613733	923C>A	NA	51	79	88	12	21	61		MLH1	Colorectal cancer, non-polyposis	3.37062	120436	954delC	rs63749926	17	115	303	51	36	430
MEN1	Hyperparathyroidism	11:64573839	613733	914G>A	NA	59	78	94	14	19	64		MLH1	Colorectal cancer, non-polyposis	3.37062	120436	955G>T	rs63750796	16	118	311	54	38	429
MEN1	Multiple endocrine neoplasia 1	11:64573841	613733	913-1G>C	NA	61	78	101	14	19	63		MLH1	Colorectal cancer, non-polyposis	3.37062	120436	962G>T	rs63750286	16	120	309.5	56.5	38.5	426
MEN1	Multiple endocrine neoplasia 1	11:64574482	613733	912+1G>C	NA	61	78	101	14	19	63		MLH1	Colorectal cancer, non-polyposis	3.37062	120436	977T>C	rs63751049	16	127	322	58	38	421
MEN1	Multiple endocrine neoplasia 1	11:64574482	613733	912+1G>A	NA	61	78	101	14	19	63		MLH1	Colorectal cancer, non-polyposis	3.37062	120436	979C>T	NA	19	127	333	59	38	420
MEN1	Multiple endocrine neoplasia 1	11:64574484	613733	911delA	NA	67	79	100	12	18	63		MLH1	Colorectal cancer, non-polyposis	3.37062	120436	985C>A	rs267607810	19	126	341	61	37	413
MEN1	Multiple endocrine neoplasia 1	11:64574493	613733	902T>G	NA	67	80	99	11	18	65		MLH1	Colorectal cancer, non-polyposis	3.37062	120436	986A>C	rs63750710	19	126	335	60	38	411
MEN1	Multiple endocrine neoplasia 1	11:645745	613733	895delC	NA	66	83	95	12	18	65		MLH1	Colorectal cancer, non-polyposis	3.37062	120436	999delG	NA	19	108	328	56	37	347
MEN1	Multiple endocrine neoplasia 1	11:64574502	613733	893delC	NA	66	85	98	12	18	69		MLH1	Colorectal cancer, non-polyposis	3.37062	120436	1003delC	NA	19	112	290	46	34	331
MEN1	Multiple endocrine neoplasia 1	11:64574517	613733	878delC	NA	71	98	112	11	20	71		MLH1	Colorectal cancer, non-polyposis	3.37062	120436	1007delG	rs63750434	17	102	285	41	32	289
MEN1	Multiple endocrine neoplasia 1	11:64574538	613733	857T>C	NA	77	105	113	12.67	16.67	72.67		MLH1	Colorectal cancer, non-polyposis	3.37067	120436	1144C>T	NA	97	103	159	75	19	93
MEN1	Multiple endocrine neoplasia 1	11:64574544	613733	851C>A	NA	77	102	117	13	16	74		MLH1	Ovarian cancer	3.37067	120436	1148T>C	rs141344760	97	105	160	73	19	91
MEN1	Multiple endocrine neoplasia 1	11:64574552	613733	843delG	NA	78.3	108.7	118.7	11.5	17.2	74.2		MLH1	Colorectal cancer, non-polyposis	3.37067	120436	1150delG	rs63749965	97	105	160	73	19	91
MEN1	Multiple endocrine neoplasia 1	11:64574554	613733	841G>C	NA	79	110	119	13	16	75		MLH1	Colorectal cancer, non-polyposis	3.37067	120436	1151T>A	rs63750447	99	107	160	69	19	90
MEN1	Multiple endocrine neoplasia 1	11:64574554	613733	841G>A	NA	79	110	119	13	16	75		MLH1	Colorectal cancer, non-polyposis	3.37067	120436	1154G>C	rs63750430	105.91	106.91	168.27	73.09	19.82	90.91
MEN1	Hyperparathyroidism	11:64574565	613733	830C>A	NA	78.33	107.67	116	10.33	17.67	71.67		MLH1	Breast and colorectal cancer	3.37067	120436	1165C>T	rs61751644	107.67	105.33	159.22	75	19.44	92.89
MEN1	Multiple endocrine neoplasia 1	11:64574567	613733	828C>A	NA	78	110	117	12	17	73		MLH1	Colorectal cancer, non-polyposis	3.37067	120436	1171C>T	NA	107	105	154	73	19	94
MEN1	Multiple endocrine neoplasia 1	11:64574571	613733	825-1G>C	NA	79	111	125	9	18	73		MLH1	Colorectal cancer, non-polyposis	3.37067	120436	1192C>T	rs63750483	101	100	146	71	19	91
MEN1	Multiple endocrine neoplasia 1	11:64574572	613733	825-2A>G	NA	80	109	123	12	18	78		MLH1	Colorectal cancer, non-polyposis	3.37067	120436	1217G>A	rs41294980	101	99	165	34	19	84
MEN1	Multiple endocrine neoplasia 1	11:6457465	613733	824+1G>A	NA	79	112	129	13	18	78		MLH1	Colorectal cancer	3.37067	120436	1238C>T	rs63750766	88	70	182	34	16	54
MEN1	Multiple endocrine neoplasia 1	11:6457465	613733	824+1delG	NA	79	112	129	13	18	78		MLH1	Colorectal cancer	3.37067	120436	1259C>G	rs63751179	114	88	245	34	19	60
MEN1	Hyperparathyroidism	11:64574651	613733	824G>T	NA	82	112	135	13	19	78		MLH1	Colorectal cancer, non-polyposis	3.37067	120436	1261delA	rs63750293	102	78	239	34	17	55
MEN1	Multiple endocrine neoplasia 1	11:64574652	613733	823delA	NA	84	118	139	13	16	79		MLH1	Colorectal cancer, non-polyposis	3.37067	120436	1276C>T	rs63750316	94	67	219	29	17	50
MEN1	Parathyroid tumour	11:64574654	613733	821A>C	NA	82	116	135	13	15	78		MLH1	Gastric cancer	3.37067	120436	1297G>C	rs63750443	104	79	221	33	17	53
MEN1	Multiple endocrine neoplasia 1	11:64574664	613733	811G>T	NA	83	123	131	12	14	83		MLH1	Colorectal cancer, non-polyposis	3.37067	120436	1310delC	rs63750748	102.67	82.67	238.33	29.67	18	58.17
MEN1	Multiple endocrine neoplasia 1	11:64574671	613733	803_804delAT	NA	82	120	136	10	14	87		MLH1	Colorectal cancer, non-polyposis	3.3707	120436	1420delC	rs63750482	45	27	210	65	18	61
MEN1	Multiple endocrine neoplasia 1	11:64574671	613733	804T>A	NA	82	120	136	10	14	87		MLH1	Colorectal cancer, non-polyposis	3.3707	120436	1463delA	rs63749876	75	84	182	18	25	98
MEN1	Multiple endocrine neoplasia 1	11:64574671	613733	804T>G	NA	82	120	136	10	14	87		MLH1	Colorectal cancer, non-polyposis	3.3707	120436	1474G>A	rs63751145	78	79	175	18	25	98
MEN1	Hyperparathyroidism	11:64574675	613733	800T>C	NA	88	134	153	11	17	88		MLH1	Colorectal cancer	3.3707	120436	1487C>T	rs63750226	76	80	179	18	24	99
MEN1	Multiple endocrine neoplasia 1	11:64574675	613733	798_800delGCT	NA	88	134	153	11	17	88		MLH1	Colorectal cancer, non-polyposis	3.3707	120436	1517T>C	rs63749909	77	71	169	18	30	89
MEN1	Multiple endocrine neoplasia 1	11:6457468	613733	795delG	NA	91	138	155	11	14	92		MLH1	Colorectal cancer, non-polyposis	3.3707	120436	1528C>T	rs63749923	72	68	160	15	31	83
MEN1	Multiple endocrine neoplasia 1	11:6457468	613733	795G>A	NA	91	138	155	11	14	92		MLH1	Colorectal cancer, non-polyposis	3.3707	120436	1534G>T	rs63751472	69	69	155	15	33	81
MEN1	Multiple endocrine neoplasia 1	11:64574681	613733	794G>A	NA	91	136	147	12	15	90		MLH1	Colorectal cancer, non-polyposis	3.37084	120436	1676T>G	rs63750059	24	113	164	76	15	162
MEN1	Multiple endocrine neoplasia 1	11:64574684	613733	791T>C	NA	88	137	147	12	14	91		MLH1	Colorectal cancer, non-polyposis	3.37084	120436	1681T>C	rs267607847	27	114	164	74	16	166
MEN1	Multiple endocrine neoplasia 1	11:64574691	613733	784A>T	NA	91	140	158	11	15	93		MLH1	Colorectal cancer, non-polyposis	3.37084	120436	1683C>G	rs63751393	29	114	168	74	15	167
MEN1	Multiple endocrine neoplasia 1	11:64574691	613733	784-4_784delCTAGAinsTCAGCC	NA	91	140	158	11	15	93		MLH1	Colorectal cancer, non-polyposis	3.37084	120436	1684C>T	rs63751460	30	117	171	74	16	168
MEN1	Multiple endocrine neoplasia 1	11:64574692	613733	784-1G>C	NA	89	136	158	13	14	92		MLH1	Colorectal cancer, non-polyposis	3.37084	120436	1685A>C	NA	28	124	190	63	16	169
MEN1	Multiple endocrine neoplasia 1	11:64574692	613733	784-1G>A	NA	89	136	158	13	14	92		MLH1	Colorectal cancer, non-polyposis	3.37084	120436	1693A>T	rs63750062	28	119	196	60	16	171
MEN1	Multiple endocrine neoplasia 1	11:64574693	613733	784-2A>G	NA	89	137	161	13	14	91		MLH1	Colorectal cancer, non-polyposis	3.37084	120436	1702T>A	rs267607848	30	122	203	64	18	170
MEN1	Adrenocortical tumour	11:645747	613733	784-9G>A	NA	89	137	161	13	14	91		MLH1	Colorectal cancer, non-polyposis	3.37084	120436	1704delT	NA	29	124	205	64	16	168
MEN1	Multiple endocrine neoplasia 1	11:64575023	613733	783+1G>A	NA	86	134	162	13	16	91		MLH1	Colorectal cancer, non-polyposis	3.37084	120436	1725delG	rs63751685	33	133	197	70	19	175
MEN1	Multiple endocrine neoplasia 1	11:64575023	613733	783+1G>T	NA	86	134	162	13	16	91		MLH1	Colorectal cancer, non-polyposis	3.37084	120436	1731G>C	NA	34	132	206	69	19	179
MEN1	Multiple endocrine neoplasia 1	11:64575023	613733	783+1G>C	NA	86	134	162	13	16	91		MLH1	Colorectal cancer, non-polyposis	3.37084	120436	1731G>A	rs63751657	34	132	206	69	19	179
MEN1	Multiple endocrine neoplasia 1	11:64575026	613733	781C>T	NA	88	131	157	14	16	89		MLH1	Colorectal cancer, non-polyposis	3.37084	120436	1731+5G>A	rs267607850	35	130	203	67	19	180
MEN1	Hyperparathyroidism	11:64575028	613733	779A>C	NA	88	124	157	13	17	87		MLH1	Colorectal cancer, non-polyposis	3.37089	120436	1732-1G>A	rs267607854	35	126	204	78	19	173
MEN1	Multiple endocrine neoplasia 1	11:64575029	613733	776_778delTGC	NA	94	125	160	13	17	87		MLH1	Colorectal cancer, non-polyposis	3.37089	120436	1733A>G	rs63751612	35	125.5	205	79	19.5	172.5
MEN1	Multiple endocrine neoplasia 1	11:64575029	613733	778C>T	rs104894266	94	125	160	13	17	87		MLH1	Colorectal cancer, non-polyposis	3.37089	120436	1763T>C	rs63750575	15	71	93	51	16	98
MEN1	Multiple endocrine neoplasia 1	11:64575031	613733	776T>C	NA	96	125	163	12	17	87		MLH1	Colorectal cancer, non-polyposis	3.3709	120436	1971delT	rs63750115	129	123	155	19	20	143
MEN1	Multiple endocrine neoplasia 1	11:64575031	613733	776T>G	NA	96	125	163	12	17	87		MLH1	Colorectal cancer, non-polyposis	3.3709	120436	1984A>C	rs63750975	129.42	97.92	130.58	19.67	20.08	131.75
MEN1	Multiple endocrine neoplasia 1	11:64575035	613733	772C>T	NA	97	127	158	12	16	85		MLH1	Colorectal cancer, non-polyposis	3.3709	120436	1988A>G	rs63751682	128	99	128	21	19	134
MEN1	Multiple endocrine neoplasia 1	11:64575041	613733	766C>T	NA	96	127	156	12	16	85		MLH1	Colorectal cancer, non-polyposis	3.3709	120436	1988delA	rs267607877	128	99	128	21	19	134
MEN1	Hyperparathyroidism	11:64575044	613733	763G>A	rs104894268	96	128	152	10	14	81		MLH1	Colorectal cancer, non-polyposis	3.3709	120436	1988A>C	rs63751682	128	99	128	21	19	134
MEN1	Parathyroid tumour	11:64575049	613733	758C>G	NA	99	126	148	10	15	81		MLH1	Colorectal cancer, non-polyposis	3.3709	120436	1989+1G>T	rs267607879	125	93	134	18	22	127
MEN1	Multiple endocrine neoplasia 1	11:64575049	613733	758C>A	NA	99	126	148	10	15	81		MLH1	Colorectal cancer, non-polyposis	3.3709	120436	1989+1G>A	rs267607879	125	93	134	18	22	127
MEN1	Multiple endocrine neoplasia 1	11:64575049	613733	758C>T	NA	99	126	148	10	15	81		MLH1	Colorectal cancer, non-polyposis	3.3709	120436	1990-3C>G	rs267607882	131	80	110	22	18	116
MEN1	Multiple endocrine neoplasia 1	11:6457505	613733	757T>C	NA	99	130	160	10	15	83		MLH1	Colorectal cancer, non-polyposis	3.3709	120436	2041G>A	rs63750217	142	60	146	19	36	100
MEN1	Multiple endocrine neoplasia 1	11:64575069	613733	738delC	NA	104	135	164	9	18	91		MLH1	Colorectal cancer, non-polyposis	3.3709	120436	2052T>G	NA	143	58	144	18	36	99
MEN1	Hyperparathyroidism	11:64575073	613733	734delC	NA	102	138	165	9	21	89		MLH1	Colorectal cancer, non-polyposis	3.3709	120436	2059C>T	rs63751275	8	0	8	0	27	26
MEN1	Multiple endocrine neoplasia 1	11:64575082	613733	725C>T	NA	104	138	167	7	21	91		MLH1	Colorectal cancer, non-polyposis	3.3709	120436	2066A>G	rs63750702	9	174	78	27	27	177
MEN1	Multiple endocrine neoplasia 1	11:64575085	613733	722G>T	NA	102	138	160	7	21	89		MLH1	Colorectal cancer, non-polyposis	3.3709	120436	2074T>C	NA	9	174	85	28	28	174
MEN1	Multiple endocrine neoplasia 1	11:64575085	613733	722G>A	NA	102	138	160	7	21	89		MLH1	Colorectal cancer, non-polyposis	3.3709	120436	2093C>G	NA	8	184	87	32	27	174
MEN1	Multiple endocrine neoplasia 1	11:64575086	613733	721T>C	NA	101	140	163	7	21	92		MLH1	Colorectal cancer, early onset	3.37091	120436	2098C>T	NA	11	175.5	85.5	39.5	29	191
MEN1	Multiple endocrine neoplasia 1	11:64575094	613733	713delT	NA	99	139	162	7	21	88		MLH1	Gastric cancer	3.37091	120436	2101C>A	rs63750114	15	175	87	44	30	180
MEN1	Multiple endocrine neoplasia 1	11:64575104	613733	703G>A	NA	94	141	143	6	22	88		MLH1	Colorectal cancer, non-polyposis	3.37091	120436	2101C>T	rs63750114	15	175	87	44	30	180
MEN1	Multiple endocrine neoplasia 1	11:64575121	613733	686G>T	NA	86	128	138	5	21	84		MLH1	Colorectal cancer, early onset	3.37091	120436	2103_2103+1delGG	NA	15	175	87	44	30	180
MEN1	Multiple endocrine neoplasia 1	11:64575121	613733	686G>A	NA	86	128	138	5	21	84		MLH1	Colorectal cancer, non-polyposis	3.37091	120436	2103G>C	rs63750603	15	175	87	44	30	180
MEN1	Multiple endocrine neoplasia 1	11:64575126	613733	681C>A	NA	90	138	145	7	22	82		MLH1	Colorectal cancer, non-polyposis	3.37092	120436	2104-22T>G	rs267607890	19	147	94	49	24	154
MEN1	Multiple endocrine neoplasia 1	11:64575126	613733	681C>G	NA	90	138	145	7	22	82		MLH1	Colorectal cancer, non-polyposis	3.37092	120436	2104-2A>G	rs267607889	19	138	99	57	24	141
MEN1	Multiple endocrine neoplasia 1	11:6457513	613733	677C>G	NA	90	133	142	7	23	81		MLH1	Colorectal cancer, non-polyposis	3.37092	120436	2104-2A>T	rs267607889	19	138	99	57	24	141
MEN1	Multiple endocrine neoplasia 1	11:64575131	613733	676T>C	NA	86	127	134	7	20	80		MLH1	Colorectal cancer, non-polyposis	3.37092	120436	2153A>C	NA	81	88	145	34	18	108
MEN1	Multiple endocrine neoplasia 1	11:64575134	613733	673G>A	NA	85	126	141	6	24	75		MLH1	Colorectal cancer, non-polyposis	3.37092	120436	2163T>A	rs63750484	247	117	453	14	25	137
MEN1	Multiple endocrine neoplasia 1	11:64575137	613733	670A>T	NA	87	123	138	6	22	74		MLH1	Colorectal cancer, non-polyposis	3.37092	120436	2170T>A	rs63749875	118	0	2	2	27	114
MEN1	Multiple endocrine neoplasia 1	11:64575139	613733	668T>C	NA	86	122	140	6	22	74		MLH1	Colorectal cancer, non-polyposis	3.37092	120436	2173C>T	rs138584384	23	0	214	35	31	92
MEN1	Multiple endocrine neoplasia 1	11:64575139	613733	668delT	NA	86	122	140	6	22	74		MLH1	Colorectal cancer, non-polyposis	3.37092	120436	2174G>A	NA	5	0	66	1	15	9
MEN1	Multiple endocrine neoplasia 1	11:6457514	613733	667delC	NA	85.5	122.5	137.5	6	22.5	75.5		MLH1	Colorectal cancer, non-polyposis	3.37092	120436	2174delG	NA	5	0	66	1	15	9
MEN1	Multiple endocrine neoplasia 1	11:64575147	613733	660G>A	NA	84	121	137	6	23	74		MSH2	Colorectal cancer, non-polyposis	2.4763	609309	110delT	rs63751056	192	281	486	121	18	310
MEN1	Multiple endocrine neoplasia 1	11:64575148	613733	659G>A	NA	85	122	142	5	25	77		MSH2	Colorectal cancer	2.4763	609309	118G>A	rs63751260	169.83	257.5	482.5	114.5	17.5	296.5
MEN1	Hyperparathyroidism	11:64575148	613733	659G>T	NA	85	122	142	5	25	77		MSH2	Colorectal cancer, non-polyposis	2.4763	609309	119delG	rs63750984	164	251.5	483.5	116	18	292
MEN1	Multiple endocrine neoplasia 1	11:64575148	613733	658_659insA	NA	85	122	142	5	25	77		MSH2	Colorectal cancer, non-polyposis	2.47631	609309	198C>G	NA	0	0	0	0	24	0
MEN1	Multiple endocrine neoplasia 1	11:64575148	613733	659G>C	NA	85	122	142	5	25	77		MSH2	Colorectal cancer, non-polyposis	2.47702	609309	1939G>A	NA	115	295	211	108	17	301
MEN1	Multiple endocrine neoplasia 1	11:64575153	613733	655-1G>T	NA	85	121	132	6	24	77		MSH2	Colorectal cancer, non-polyposis	2.47702	609309	1955C>A	NA	128	317	217	109	19	323
MEN1	Multiple endocrine neoplasia 1	11:64575153	613733	655-1G>C	NA	85	121	132	6	24	77		MSH2	Colorectal cancer, non-polyposis	2.47708	609309	2485delC	NA	17	122	388	45	26	140
MEN1	Multiple endocrine neoplasia 1	11:64575155	613733	655-3A>G	NA	82	121	118	4	24	68		MSH2	Colorectal cancer, non-polyposis	2.47708	609309	2507delT	rs63750008	20	210	435	50	19	199
MEN1	Multiple endocrine neoplasia 1	11:64575156	613733	655-4delT	NA	82	121	118	4	24	68		MSH2	Colorectal cancer, non-polyposis	2.47708	609309	2516A>G	rs63750027	19	217	433	50	21	199
MEN1	Multiple endocrine neoplasia 1	11:64575158	613733	655-6C>T	rs77461664	82	118	113	4	24	63		MSH2	Colorectal cancer, non-polyposis	2.47708	609309	2533A>G	rs63750571	19	231	416	51	20	215
MEN1	Multiple endocrine neoplasia 1	11:64575158	613733	655-6C>G	NA	82	118	113	4	24	63		MSH2	Gastric cancer	2.47708	609309	2602C>G	rs63751400	95.2	72.73	252.4	102.6	18.47	73.07
MEN1	Multiple endocrine neoplasia 1	11:64575158	613733	655-6C>A	NA	82	118	113	4	24	63		MSH2	Gastric cancer	2.47708	609309	2609C>G	NA	95	72	254	104	19	72
MEN1	Prolactinoma	11:64575159	613733	655-7C>A	NA	80	116	119	4	22	58		MSH6	Colorectal cancer, non-polyposis	2.48027	600678	1453C>T	rs63751042	108	176	290	19	34	196
MEN1	Multiple endocrine neoplasia 1	11:6457536	613733	654+3A>G	NA	81	115	114	4	24	58		MSH6	Colorectal cancer, non-polyposis	2.48027	600678	1474A>G	rs61754783	108	175	289	18	34	195
MEN1	Multiple endocrine neoplasia 1	11:64575362	613733	654+1G>C	NA	82	118	115	4	22	61		MSH6	Colorectal cancer, non-polyposis	2.48027	600678	1738delT	NA	0	0	2	1	35	1
MEN1	Multiple endocrine neoplasia 1	11:64575362	613733	654+1G>A	NA	82	118	115	4	22	61		MSH6	Colorectal cancer	2.48027	600678	2360C>T	rs63750637	92	89	251	32	17	91
MEN1	Multiple endocrine neoplasia 1	11:64575362	613733	654+1G>T	NA	82	118	115	4	22	61		MSH6	Colorectal cancer, non-polyposis	2.48027	600678	2375T>C	NA	97.8	88.4	255	31.8	19.2	90.8
MEN1	Multiple endocrine neoplasia 1	11:64575363	613733	654G>T	NA	80	110	111	3	22	59		MSH6	Colorectal cancer, non-polyposis	2.48028	600678	2503C>T	rs63751321	99	83	266	33	19	89
MEN1	Multiple endocrine neoplasia 1	11:64575374	613733	643G>A	NA	77	107	100	4	20	58		MSH6	Colorectal cancer	2.48028	600678	2504delA	NA	99	90	265	33	19	94
MEN1	Multiple endocrine neoplasia 1	11:64575376	613733	641delG	NA	74	105	109	4	22	60		MSH6	Colorectal cancer, non-polyposis	2.48028	600678	2549A>G	rs63750389	109	81	248	39	19	89
MEN1	Multiple endocrine neoplasia 1	11:64575392	613733	625delC	NA	69	97	103	4	23	56		MSH6	Colorectal cancer, non-polyposis	2.48028	600678	2604delG	NA	126	82	303	37	18	106
MEN1	Multiple endocrine neoplasia 1	11:64575392	613733	625C>T	NA	69	97	103	4	23	56		MSH6	Colorectal cancer	2.48028	600678	2815C>T	rs63750140	146	173	414	72	19	176
MEN1	Multiple endocrine neoplasia 1	11:64575408	613733	609delC	NA	72	98	112	3	22	54		MSH6	Colorectal cancer	2.48028	600678	2927G>A	rs63751113	146	172	397	59	19	165
MEN1	Multiple endocrine neoplasia 1	11:64575412	613733	605delG	NA	70	97	109	3	24	53		MSH6	Colorectal cancer	2.48031	600678	3284G>A	rs63750253	277	368	419	15	23	302
MEN1	Multiple endocrine neoplasia 1	11:64575415	613733	602delA	NA	70	97	104	3	23	54		MSH6	Colorectal cancer	2.48031	600678	3299C>T	rs63750442	268	354	406	13	27	286
MEN1	Multiple endocrine neoplasia 1	11:64575415	613733	600_601dupCA	NA	70	97	104	3	23	54		MSH6	Colorectal cancer, non-polyposis	2.48031	600678	3320delA	rs63750377	267	337	411	15	29	290
MEN1	Multiple endocrine neoplasia 1	11:64575423	613733	594G>A	rs104894257	72	98	102	3	27	54		MSH6	Colorectal cancer, early onset	2.48031	600678	3344T>C	NA	245	325	392	12	31	264
MEN1	Multiple endocrine neoplasia 1	11:64575424	613733	593G>A	rs104894258	72	98	102	3	27	54		MSH6	Colorectal cancer, non-polyposis	2.48031	600678	3355G>T	rs267608084	233	322	388	11	30	249
MEN1	Hyperparathyroidism	11:64575427	613733	590C>T	NA	71	97	104	2	28	52		MSH6	Ovarian cancer	2.48031	600678	3407A>G	NA	193	288	355	10	33	224
MEN1	Multiple endocrine neoplasia 1	11:64575433	613733	584A>G	NA	69	99	97	2	28	51		MSH6	Colorectal cancer, non-polyposis	2.48031	600678	3407delA	NA	193	288	355	10	33	224
MEN1	Multiple endocrine neoplasia 1	11:64575439	613733	578C>T	NA	64	101	91	2	26	51		MSH6	Colorectal cancer, non-polyposis	2.48031	600678	3415G>A	rs63751063	0	0	2	0	35	2
MEN1	Hyperparathyroidism	11:64575443	613733	574C>T	NA	66	101	94	2	27	50		MSH6	Muir-Torre syndrome	2.48031	600678	3436C>T	rs63750356	0	0	0	0	32	0
MEN1	Hyperparathyroidism	11:64575446	613733	570_571delGGinsC	NA	59	97	92	2	25	52		MSH6	Ovarian cancer	2.48033	600678	3801+1delG	NA	66	162	476	27	19	183
MEN1	Multiple endocrine neoplasia 1	11:64575446	613733	571delG	NA	59	97	92	2	25	52		MSH6	Colorectal cancer	2.48034	600678	4061T>A	rs267608140	17	46	95	48	33	131
MEN1	Multiple endocrine neoplasia 1	11:64575446	613733	571G>T	NA	59	97	92	2	25	52		MUTYH	Colorectal adenoma	1.45797	604933	1461delC	NA	1	93	166	61	18	95
MEN1	Hyperparathyroidism	11:64575454	613733	563C>T	rs199706698	49.75	93	81.75	2	24.25	52.25		MUTYH	Colorectal adenoma	1.45797	604933	1438G>T	rs121908381	1	87	232	60	23	94
MEN1	Multiple endocrine neoplasia 1	11:64575459	613733	558delT	NA	47	91	82	2	26	55		MUTYH	Adenomatous polyposis coli	1.45797	604933	1435G>T	NA	1	73	224	56	25	93
MLH1	Colorectal cancer, non-polyposis	3:37035043	120436	5C>A	NA	35	93	169	17	23	218		MUTYH	Colorectal cancer	1.45797	604933	1431G>C	rs74318065	1	54	197	50	26	87
MLH1	Colorectal cancer, non-polyposis	3:37035047	120436	9delC	rs63750745	36	86.5	183.75	16.5	25.5	209.5		MUTYH	MYH polyposis	1.45797	604933	1418C>A	rs200844166	1	22	157	42	28	95
MLH1	Colorectal cancer, non-polyposis	3:37038112	120436	119delT	NA	65	83	195	31	17	224		MUTYH	Colorectal cancer	1.45797	604933	1417G>A	rs192816572	2	12	99	27	14	49
MLH1	Colorectal cancer, non-polyposis	3:37038114	120436	121G>C	rs267607713	65	83	195	31	17	224		MUTYH	Adenomatous polyposis coli	1.45797	604933	1276C>T	rs150792276	19	47	76	69	35	79
MLH1	Colorectal cancer, non-polyposis	3:37038115	120436	122A>G	rs63751094	59	68	172	17	17	189		MUTYH	Colorectal cancer	1.45797	604933	1258C>A	rs144079536	18	46	78	69	37	80
MLH1	Colorectal cancer, non-polyposis	3:37038115	120436	122A>G	rs63751094	59	68	172	17	17	189		MUTYH	Adenomatous polyposis coli	1.45797	604933	1187G>A	rs36053993	30	41	87	187	19	75
MLH1	Colorectal cancer, non-polyposis	3:37038115	120436	122_123delATinsTA	NA	59	68	172	17	17	189		MUTYH	Colorectal adenoma	1.45797	604933	1147delC	NA	60.21	94.36	33.5	7.71	27	104.14
MLH1	Colorectal cancer, non-polyposis	3:37038124	120436	131C>T	rs63751109	59	64	151	14	20	178		MUTYH	MYH polyposis	1.45797	604933	1138C>A	NA	60	90	37	6	28	101
MLH1	Colorectal cancer, non-polyposis	3:37038124	120436	128_131dupAATC	NA	59	64	151	14	20	178		MUTYH	Adenomatous polyposis coli	1.45797	604933	1134delA	NA	54	88	41	9	27	97
MLH1	Colorectal cancer, non-polyposis	3:37042456	120436	218T>C	NA	108	135	386	65	17	90		MUTYH	Colorectal adenoma	1.45797	604933	1118C>T	rs35352891	48	92	48	14	23	89
MLH1	Colorectal cancer, non-polyposis	3:37042467	120436	229T>C	rs63749859	108	135	388	63	18	89		MUTYH	Multiple colorectal adenomas	1.45797	604933	1101delC	NA	48	92	48	14	23	89
MLH1	Colorectal cancer, non-polyposis	3:37042499	120436	261delC	rs267607728	78	101	191	41	19	63		MUTYH	Adenomatous polyposis coli	1.45797	604933	1038G>A	NA	43	99	87	17	23	77
MLH1	Colorectal cancer, non-polyposis	3:37042503	120436	265G>T	rs11541859	72	97	185	42	18	64		MUTYH	Colorectal cancer	1.45798	604933	586G>T	NA	82	102	108	15	24	68
MLH1	Gastric cancer	3:37042512	120436	274G>C	rs63750133	71	96	186	41	18	64		MUTYH	MYH polyposis	1.45798	604933	566G>A	NA	97	117	143	11	20	77
MLH1	Colorectal cancer, non-polyposis	3:37042515	120436	277A>G	rs41295282	60	117	122	46	17	67		MUTYH	Adenomatous polyposis coli	1.45798	604933	554G>A	NA	76	100	108	8	20	65
MLH1	Colorectal cancer, non-polyposis	3:37042515	120436	277_278delAG	NA	60	117	122	46	17	67		MUTYH	Adenomatous polyposis coli	1.45798	604933	553C>T	NA	108	143	130	16	24	100
MLH1	Colorectal cancer, young-onset	3:37042529	120436	291T>G	NA	56	119	125	49	16	68		MUTYH	Colorectal adenoma	1.45798	604933	551G>A	NA	107	147	135	15	24	103
MLH1	Colorectal cancer, non-polyposis	3:3704253	120436	292G>C	rs267607725	41.3	112.8	98.7	61.4	16.4	76.7		MUTYH	MYH polyposis	1.45798	604933	545G>A	NA	91	132	147	6	27	95
MLH1	Colorectal cancer, non-polyposis	3:3704253	120436	292G>A	rs267607725	41.3	112.8	98.7	61.4	16.4	76.7		MUTYH	MUTYH-associated polyposis	1.45798	604933	544C>G	NA	85	125	150	6	26.5	90.5
MLH1	Colorectal cancer	3:37042537	120436	299G>C	rs63750266	28	115	71	51	16	76		MUTYH	Adenomatous polyposis coli	1.45798	604933	544C>T	NA	85	125	150	6	26.5	90.5
MLH1	Colorectal cancer, non-polyposis	3:37042539	120436	301G>A	rs267607726	29	106	63	53	17	77		MUTYH	Colorectal cancer	1.45798	604933	539A>C	NA	74	103	146	7	29	74
MLH1	Colorectal cancer, non-polyposis	3:3704254	120436	302G>A	rs267607727	26.93	104.93	57.2	50.27	18.67	78.07		MUTYH	Adenomatous polyposis coli	1.45798	604933	536A>G	rs34612342	71	89	143	7	30	68
MLH1	Colorectal cancer, non-polyposis	3:37042542	120436	304G>A	rs63750453	28	106	61	53	18	78		MUTYH	MUTYH-associated polyposis	1.45799	604933	241G>T	NA	17	58	145	34	31	91
MLH1	Colorectal cancer, non-polyposis	3:37042547	120436	306+3A>C	rs267607731	103	123	75	115	19	86		MUTYH	Adenomatous polyposis coli	1.458	604933	74G>A	rs75321043	15	52	135	31	30	89
MLH1	Colorectal cancer, non-polyposis	3:37042548	120436	306+4A>G	rs267607733	108	123	81	116	16	91		MUTYH	MUTYH-associated polyposis	1.458	604933	55C>T	NA	14	50	130	32	33	90
MLH1	Colorectal cancer, non-polyposis	3:37042549	120436	306+5G>A	rs267607735	95	133	78	111	17	99		MUTYH	Adenomatous polyposis coli	1.458	604933	53C>T	rs79777494	10	50	119	30	29	86
MLH1	Colorectal cancer, non-polyposis	3:3704589	120436	307-2A>C	rs267607732	99	135	83	111	16	99		MYBPC3	Cardiomyopathy, hypertrophic	11.4735	600958	3656T>C	NA	65	0	2	62	27	221
MLH1	Colorectal cancer, non-polyposis	3:37045891	120436	307-1G>C	rs267607736	100	139	87	105	18	102		MYBPC3	Cardiomyopathy, left ventricular noncompaction	11.4735	600958	3599T>C	NA	83	87	321	11	22	87
MLH1	Colorectal cancer, non-polyposis	3:37045896	120436	311delT	NA	94	134	86	104	17	101		MYBPC3	Cardiomyopathy, hypertrophic	11.4735	600958	3584G>T	NA	87	82	376	13	21	87
MLH1	Gastric cancer	3:37045903	120436	318C>G	rs63750297	92	144	109	104	18	94		MYBPC3	Cardiomyopathy, hypertrophic	11.4735	600958	3580G>A	NA	85	88	449	12	20	84
MLH1	Colorectal cancer, non-polyposis	3:37045903	120436	318C>A	NA	92	144	109	104	18	94		MYBPC3	Cardiomyopathy, hypertrophic	11.4735	600958	3560T>G	NA	88.38	75.88	572.88	13.38	32.5	82.62
MLH1	Colorectal cancer, non-polyposis	3:37045905	120436	320T>G	rs63750507	91	142	125	103	15	93		MYBPC3	Cardiomyopathy, hypertrophic	11.4735	600958	3551C>A	NA	108	111	436	15	26	94
MLH1	Colorectal cancer, non-polyposis	3:37045949	120436	364G>T	NA	33	139	162	50	19	103		MYBPC3	Cardiomyopathy, hypertrophic	11.4735	600958	3516delT	NA	118	123	376	14	22	100
MLH1	Colorectal cancer, non-polyposis	3:37045952	120436	367A>T	rs63750542	26	108	104	37	18	93		MYBPC3	Cardiomyopathy, hypertrophic	11.4735	600958	3515A>G	NA	133	125	314	14	25	120
MLH1	Colorectal cancer, non-polyposis	3:37045961	120436	376T>A	rs200076893	24	108	104	35	16	91		MYBPC3	Cardiomyopathy, hypertrophic	11.4735	600958	3337T>A	NA	146	182	16	57	29	224
MLH1	Colorectal cancer, non-polyposis	3:37045963	120436	378C>G	rs63751606	17	104	95	31	16	90		MYBPC3	Cardiomyopathy, hypertrophic	11.4736	600958	2654C>T	NA	36	10	9	46	38	18
MLH1	Colorectal cancer, non-polyposis	3:37045963	120436	378delC	rs63751607	17	104	95	31	16	90		MYBPC3	Cardiomyopathy, hypertrophic	11.4736	600958	2429G>A	NA	79	116	314	84	17	158
MLH1	Colorectal cancer	3:37045963	120436	378C>A	NA	17	104	95	31	16	90		MYBPC3	Cardiomyopathy, hypertrophic	11.4736	600958	2429G>T	NA	79	116	314	84	17	158
MLH1	Colorectal cancer, non-polyposis	3:37045965	120436	380G>A	rs63751595	17	103	101	34	18	95		MYBPC3	Cardiomyopathy, hypertrophic	11.4736	600958	2413G>A	NA	79	117	377	98	18	163
MLH1	Colorectal cancer, non-polyposis	3:37045966	120436	380+1G>A	rs267607745	17	99	103	33	18	92		MYBPC3	Cardiomyopathy, hypertrophic	11.4736	600958	2382delG	NA	78	113	333	97	17	156
MLH1	Colorectal cancer, non-polyposis	3:37050344	120436	493delG	NA	31	40	17	26	26	277		MYBPC3	Cardiomyopathy, hypertrophic	11.4736	600958	2373dupG	NA	82	121	364	94	19	161
MLH1	Colorectal cancer, non-polyposis	3:37053351	120436	586A>T	rs63750500	128.33	114	99.17	59	19.5	68.17		MYBPC3	Cardiomyopathy, hypertrophic	11.4736	600958	2374T>C	rs187830361	82	121	364	94	19	161
MLH1	Colorectal cancer	3:37053354	120436	588+1G>T	rs267607772	122	114	100	58	19	73		MYBPC3	Cardiomyopathy, hypertrophic	11.4736	600958	2347G>C	NA	84	118	336	100	17	154
MLH1	Colorectal cancer, non-polyposis	3:37053354	120436	588+1delG	rs267607773	122	114	100	58	19	73		MYBPC3	Cardiomyopathy, hypertrophic	11.4736	600958	2347G>T	NA	84	118	336	100	17	154
MLH1	Colorectal cancer, non-polyposis	3:37053355	120436	588+2T>C	NA	124	111	105	60	17	75		MYBPC3	Cardiomyopathy, hypertrophic	11.4736	600958	2320G>A	NA	86	122	320	105	19	156
MLH1	Colorectal cancer, non-polyposis	3:37053355	120436	588+2T>A	NA	124	111	105	60	17	75		MYBPC3	Cardiomyopathy, hypertrophic	11.4736	600958	2273G>A	NA	89	111	315	114	19	127
MLH1	Colorectal cancer, non-polyposis	3:370535	120436	589-2A>G	rs267607767	114	123	83	56	19	85		MYBPC3	Cardiomyopathy, hypertrophic	11.4736	600958	2265C>A	NA	89	104	271	107	17	124
MLH1	Colorectal cancer, non-polyposis	3:3705356	120436	647T>G	rs267607776	96	164	54	31	19	102		MYH7	Cardiomyopathy, hypertrophic	14.2389	160760	3133C>T	rs45611033	104	95	181	18	40	92
MLH1	Colorectal cancer, non-polyposis	3:37053562	120436	649C>T	rs4986984	93.25	164	60.5	32.5	19.75	103.5		MYH7	Cardiomyopathy, hypertrophic	14.2389	160760	3131T>C	NA	103	88	170	17	33	93
MLH1	Colorectal cancer, non-polyposis	3:37053568	120436	655A>G	rs1799977	91	165	63	34	19	103		MYH7	Cardiomyopathy, dilated	14.2389	160760	3113T>C	NA	100	76	179	19	28	90
MLH1	Colorectal cancer, non-polyposis	3:37055938	120436	693delT	rs63750764	182	249	369	87	19	210		MYH7	Cardiomyopathy, hypertrophic	14.2389	160760	2345G>A	NA	83	0	9	220	37	92
MLH1	Colorectal cancer, non-polyposis	3:37055946	120436	701A>G	rs63750696	180	252	366	84	17	213		MYH7	Cardiomyopathy, hypertrophic	14.2389	160760	2344_2345delAGinsGA	NA	83	0	9	220	37	92
MLH1	Colorectal cancer, non-polyposis	3:37055962	120436	717C>A	rs63749901	181	257	375	84	19	215		MYH7	Cardiomyopathy, hypertrophic	14.2389	160760	2337G>C	NA	165	84	67	1	29	74
MLH1	Colorectal cancer, non-polyposis	3:37055976	120436	731G>A	rs63750303	183	254	349	82	18	207		MYH7	Cardiomyopathy, hypertrophic	14.2389	160760	2335G>T	NA	133	252	234	53	14	276
MLH1	Colorectal cancer, non-polyposis	3:37055976	120436	731G>T	rs63750303	183	254	349	82	18	207		MYH7	Cardiomyopathy, hypertrophic	14.2389	160760	2334C>G	NA	115	255	228	44	16	278
MLH1	Colorectal cancer, non-polyposis	3:37059083	120436	877T>G	NA	96	175	150	30	19	115		MYH7	Cardiomyopathy, hypertrophic	14.2389	160760	2334C>A	NA	115	255	228	44	16	278
MLH1	Colorectal cancer, non-polyposis	3:37059093	120436	884+3A>G	rs267607803	80	139.5	148	36	19	114.5		MYH7	Cardiomyopathy, hypertrophic	14.239	160760	2189T>C	NA	15	99	158	100	34	124
MLH1	Colorectal cancer, non-polyposis	3:37061803	120436	887dupT	NA	70	135	143	35	18	111		MYH7	Cardiomyopathy, hypertrophic	14.239	160760	2185G>C	NA	14	95	157	80	34	119
MLH1	Colorectal cancer, non-polyposis	3:37061803	120436	885-9_887dupTCCTGACAGTTT	NA	70	135	143	35	18	111		MYH7	Cardiomyopathy, non-compaction, left ventricular	14.239	160760	1972C>G	NA	80	258	359	49	19	195
MLH1	Colorectal cancer, non-polyposis	3:37061803	120436	887T>G	rs63750547	70	135	143	35	18	111		MYH7	Cardiomyopathy, hypertrophic	14.239	160760	1954A>G	NA	145	194	514	13	31	142
MLH1	Colorectal cancer, non-polyposis	3:37061804	120436	888delA	rs267607809	9	90	151	31	24	299		MYH7	Cardiomyopathy, dilated	14.239	160760	1925C>T	rs121913646	139	133	347	17	31	131
MLH1	Colorectal cancer, non-polyposis	3:37061805	120436	889G>T	rs63750736	9	88	157	31	25	299		MYH7	Cardiomyopathy, hypertrophic	14.239	160760	1843A>C	NA	150.33	121.33	143.33	17	36.67	105.67
MLH1	Colorectal cancer, non-polyposis	3:37061817	120436	901C>T	rs63750489	10	87	153	29	25	302		MYH7	Cardiomyopathy, hypertrophic	14.239	160760	1826A>G	NA	151	134	150	17	32	106
MLH1	Colorectal cancer, non-polyposis	3:37061824	120436	908T>A	rs267607813	10	93	157	34	32	317		MYH7	Cardiomyopathy, hypertrophic	14.239	160760	1801C>T	NA	133	241	574	19	44	199
MLH1	Colorectal cancer, early onset	3:37061827	120436	911A>G	NA	11	98	168	33	33	323		MYH7	Cardiomyopathy, hypertrophic	14.239	160760	1801C>G	NA	133	241	574	19	44	199
MLH1	Colorectal cancer, non-polyposis	3:37061827	120436	911A>T	rs63750993	11	98	168	33	33	323		MYH7	Cardiomyopathy, dilated	14.239	160760	1772T>C	NA	66	56	336	12	24	49
MLH1	Colorectal cancer, non-polyposis	3:37061865	120436	949C>A	rs267607814	10.33	123.33	217.67	47.33	32.33	370.33		MYH7	Cardiomyopathy, hypertrophic	14.239	160760	1760A>T	NA	129	108	351	19	24	115
MLH1	Colorectal cancer, non-polyposis	3:3706187	120436	954delC	rs63749926	18	140	286	53	36	377		MYH7	Cardiomyopathy, hypertrophic	14.239	160760	1495G>A	rs3218715	141	117	167	14	26	106
MLH1	Colorectal cancer, non-polyposis	3:37061871	120436	955G>T	rs63750796	17	144	290	54	38	377		MYH7	Cardiomyopathy, hypertrophic	14.239	160760	1491G>T	rs267606911	134	88	126	13	23	74
MLH1	Colorectal cancer, non-polyposis	3:37061878	120436	962G>T	rs63750286	17	149	284.5	52.5	38.5	373		MYH7	Cardiomyopathy, hypertrophic	14.239	160760	1477A>T	NA	135	81	133	15	20	65
MLH1	Colorectal cancer, non-polyposis	3:37061893	120436	977T>C	rs63751049	17	156	300	55	38	364		MYH7	Cardiomyopathy, dilated	14.239	160760	1423C>A	NA	34	29	95	27	3	21
MLH1	Colorectal cancer, non-polyposis	3:37061895	120436	979C>T	NA	19	158	308	54	38	365		MYH7	Cardiomyopathy, dilated	14.239	160760	1405G>T	NA	29	42	124	30	9	43
MLH1	Colorectal cancer, non-polyposis	3:37061901	120436	985C>A	rs267607810	19	156	309	55	37	357		MYH7	Cardiomyopathy, dilated	14.239	160760	1402T>C	NA	28	41	124	33	8	43
MLH1	Colorectal cancer, non-polyposis	3:37061902	120436	986A>C	rs63750710	19	158	304	56	38	356		MYH7	Cardiomyopathy, hypertrophic	14.239	160760	1400T>C	NA	58	54	204	46	15	46
MLH1	Colorectal cancer, non-polyposis	3:37061915	120436	999delG	NA	19	137	304	51	37	296		MYH7	Cardiomyopathy, hypertrophic	14.239	160760	1399A>C	NA	94	87	250	71	10	78
MLH1	Colorectal cancer, non-polyposis	3:37061919	120436	1003delC	NA	19	136	264	41	34	285		MYH7	Cardiomyopathy, hypertrophic	14.239	160760	1370T>C	NA	135	118.33	296.67	95.67	16.33	93
MLH1	Colorectal cancer, non-polyposis	3:37061923	120436	1007delG	rs63750434	18	124	263	41	32	250		MYH7	Cardiomyopathy, dilated	14.239	160760	1325G>A	NA	12	13	124	57	25	19
MLH1	Colorectal cancer, non-polyposis	3:37067233	120436	1144C>T	NA	81	145	144	55	19	80		MYH7	Cardiomyopathy, hypertrophic	14.239	160760	1324C>T	rs148808089	11	26	155	67	16	38
MLH1	Ovarian cancer	3:37067237	120436	1148T>C	rs141344760	80	147	144	55	19	79		MYH7	Cardiomyopathy & distal myopathy	14.239	160760	1322C>T	rs121913653	18	48	232	50	19	38
MLH1	Colorectal cancer, non-polyposis	3:37067239	120436	1150delG	rs63749965	80	147	144	55	19	79		MYH7	Cardiomyopathy, non-compaction	14.239	160760	754T>C	NA	1	177	185	644	28	230
MLH1	Colorectal cancer, non-polyposis	3:3706724	120436	1151T>A	rs63750447	82	147	140	54	19	77		MYH7	Cardiomyopathy, hypertrophic	14.239	160760	751C>A	NA	0	171	475	503	34	213
MLH1	Colorectal cancer, non-polyposis	3:37067243	120436	1154G>C	rs63750430	85.82	142.82	141.09	63.45	19.82	75.73		MYH7	Cardiomyopathy, hypertrophic	14.239	160760	736A>C	NA	3	177	352	951	28	223
MLH1	Breast and colorectal cancer	3:37067254	120436	1165C>T	rs61751644	89.11	140.56	133.11	65.33	19.44	77.11		MYH7	Cardiomyopathy, non-compaction	14.239	160760	732+3G>C	NA	3	177	354	949	28	225
MLH1	Colorectal cancer, non-polyposis	3:3706726	120436	1171C>T	NA	89	139	128	65	19	77		MYH7	Cardiomyopathy, non-compaction	14.239	160760	732+1G>A	NA	2	172	368	848	35	236
MLH1	Colorectal cancer, non-polyposis	3:37067281	120436	1192C>T	rs63750483	85	136	116	63	19	73		MYH7	Cardiomyopathy, hypertrophic	14.239	160760	730T>C	NA	0	196	259	756	28	176
MLH1	Colorectal cancer, non-polyposis	3:37067306	120436	1217G>A	rs41294980	89	128	159	30	19	80		MYH7	Cardiomyopathy, hypertrophic	14.239	160760	728G>A	rs267606910	0	208	274	720	25	182
MLH1	Colorectal cancer	3:37067327	120436	1238C>T	rs63750766	74	84	199	34	16	52		MYH7	Cardiomyopathy, hypertrophic	14.239	160760	727C>T	NA	0	186	375	771	28	166
MLH1	Colorectal cancer	3:37067348	120436	1259C>G	rs63751179	101	102	266	33	19	58		MYH7	Cardiomyopathy, hypertrophic	14.239	160760	632C>T	NA	61	60	19	18	18	69
MLH1	Colorectal cancer, non-polyposis	3:3706735	120436	1261delA	rs63750293	88	95	260	34	17	51		MYH7	Cardiomyopathy, hypertrophic	14.239	160760	625C>G	NA	67	66	19	19	23	74
MLH1	Colorectal cancer, non-polyposis	3:37067365	120436	1276C>T	rs63750316	78	83	244	28	17	46		MYH7	Cardiomyopathy, hypertrophic	14.239	160760	619A>C	NA	75	63	11	21	20	77
MLH1	Gastric cancer	3:37067386	120436	1297G>C	rs63750443	90	98	246	33	17	51		MYH7	Cardiomyopathy, hypertrophic	14.239	160760	613A>T	NA	60	80	10	20	29	89
MLH1	Colorectal cancer, non-polyposis	3:37067399	120436	1310delC	rs63750748	90.17	102	257.83	31.67	18	55.83		MYH7	Cardiomyopathy, hypertrophic	14.239	160760	611G>A	NA	48	83	6	16	28	95
MLH1	Colorectal cancer, non-polyposis	3:37070285	120436	1420delC	rs63750482	39	39	191	54	18	57		MYH7	Cardiomyopathy, dilated	14.239	160760	602T>C	NA	44	85	6	19	23	84
MLH1	Colorectal cancer, non-polyposis	3:37070286	120436	1421G>A	rs63751083	37	71	123	15	22	52		MYH7	Cardiomyopathy	14.239	160760	596C>T	NA	45	84	5	22	22	88
MLH1	Colorectal cancer, non-polyposis	3:37070316	120436	1451delA	NA	47	76	152	16	23	63		MYH7	Cardiomyopathy, hypertrophic	14.239	160760	586G>A	NA	39	77	6	23	25	94
MLH1	Colorectal cancer, non-polyposis	3:37070318	120436	1453G>C	rs63750314	50	74	150	16	24	66		MYH7	Cardiomyopathy, hypertrophic	14.239	160760	581A>C	NA	38	78	7	22	24	101
MLH1	Colorectal cancer, non-polyposis	3:3707032	120436	1455T>A	rs63750956	65	100	168.5	12	24	84.5		MYH7	Cardiomyopathy, hypertrophic	14.239	160760	569G>C	NA	40	82	7	22	24	108
MLH1	Colorectal cancer, non-polyposis	3:37070324	120436	1459C>T	rs63749795	65	100	170	12	24	87		MYH7	Cardiomyopathy, hypertrophic	14.239	160760	563C>A	NA	36	84	8	18	22	114
MLH1	Colorectal cancer, non-polyposis	3:37070328	120436	1463delA	rs63749876	66	100	174	10	25	87		MYH7	Cardiomyopathy, hypertrophic	14.239	160760	561C>G	NA	35	84	6	14	20	115
MLH1	Colorectal cancer, non-polyposis	3:37070339	120436	1474G>A	rs63751145	68	96	167	10	25	88		MYH7	Cardiomyopathy, hypertrophic	14.239	160760	556G>C	NA	33	82	6	13	19	125
MLH1	Colorectal cancer	3:37070352	120436	1487C>T	rs63750226	66	97	169	10	24	91		MYH7	Cardiomyopathy, hypertrophic	14.239	160760	532G>A	NA	32	73	5	13	21	129
MLH1	Colorectal cancer, non-polyposis	3:37070356	120436	1491delG	rs63751435	67	88	164	12	29	86		MYH7	Cardiomyopathy, hypertrophic	14.239	160760	530C>T	NA	31	74	6	11	24	128
MLH1	Colorectal cancer, non-polyposis	3:37070382	120436	1517T>C	rs63749909	68	83	162	10	30	85		MYH7	Cardiomyopathy	14.239	160760	505A>G	NA	38	34	34	5	23	124
MLH1	Colorectal cancer, non-polyposis	3:37070393	120436	1528C>T	rs63749923	63	75	161	9	31	80		MYH7	Cardiomyopathy, hypertrophic	14.239	160760	485A>G	NA	41	37	35	5	24	108
MLH1	Colorectal cancer, non-polyposis	3:37070399	120436	1534G>T	rs63751472	60	77	152	10	33	78		MYH7	Cardiomyopathy, hypertrophic	14.239	160760	484T>C	NA	44	38	37	5	26	108
MLH1	Colorectal cancer, non-polyposis	3:37083767	120436	1676T>G	rs63750059	25	144	160	63	15	142		MYH7	Cardiomyopathy, hypertrophic	14.239	160760	443G>T	NA	44	41	37	3	26	108
MLH1	Colorectal cancer, non-polyposis	3:37083772	120436	1681T>C	rs267607847	27	146	163	57	16	146		MYH7	Cardiomyopathy, hypertrophic	14.239	160760	438G>T	NA	42	45	44	4	23	101
MLH1	Colorectal cancer, non-polyposis	3:37083774	120436	1683C>G	rs63751393	29	149	158	59	15	146		MYH7	Cardiomyopathy, hypertrophic	14.239	160760	428G>A	NA	43	47	44	3	23	93
MLH1	Colorectal cancer, non-polyposis	3:37083775	120436	1684C>T	rs63751460	30	152	163	61	16	147		MYH7	Cardiomyopathy, hypertrophic	14.239	160760	427C>G	NA	43	47	44	3	23	93
MLH1	Colorectal cancer, non-polyposis	3:37083776	120436	1685A>C	NA	30	158	179	50	16	148		MYH7	Cardiomyopathy, hypertrophic	14.239	160760	427C>T	NA	43	47	44	3	23	93
MLH1	Colorectal cancer, non-polyposis	3:37083784	120436	1693A>T	rs63750062	31	151	185	49	16	148		MYH7	Cardiomyopathy, dilated	14.239	160760	424T>C	NA	46.33	52.78	41.11	2.56	20.78	87.44
MLH1	Colorectal cancer, non-polyposis	3:37083793	120436	1702T>A	rs267607848	33	162	189	51	18	150		MYH7	Cardiomyopathy, hypertrophic	14.239	160760	371C>T	NA	46	49	37	3	20	91
MLH1	Colorectal cancer, non-polyposis	3:37083795	120436	1704delT	NA	31	162	189	52	16	149		MYH7	Cardiomyopathy, hypertrophic	14.239	160760	343T>C	NA	46	54.77	41	2.62	20.08	84.62
MLH1	Colorectal cancer, non-polyposis	3:37083816	120436	1725delG	rs63751685	35	169	185	59	19	157		MYH7	Cardiomyopathy, hypertrophic	14.239	160760	298G>A	NA	46	49	42	3	21	88
MLH1	Colorectal cancer, non-polyposis	3:37083822	120436	1731G>C	NA	35	172	191	56	19	163		MYH7	Cardiomyopathy, dilated	14.239	160760	241C>T	NA	46	49	42	3	21	88
MLH1	Colorectal cancer, non-polyposis	3:37083822	120436	1731G>A	rs63751657	35	172	191	56	19	163		MYH7	Cardiomyopathy, hypertrophic	14.239	160760	175G>A	NA	46.85	56.62	40.85	2.77	20	82.38
MLH1	Colorectal cancer, non-polyposis	3:37083827	120436	1731+5G>A	rs267607850	37	169	187	53	19	165		MYH7	Cardiomyopathy, hypertrophic	14.239	160760	160C>T	NA	47	55	42	2	21	83
MLH1	Colorectal cancer, non-polyposis	3:37089009	120436	1732-1G>A	rs267607854	37	170	190	65	19	155		MYH7	Cardiomyopathy, hypertrophic	14.239	160760	115G>A	NA	47	55	39	3	20	85
MLH1	Colorectal cancer, non-polyposis	3:37089011	120436	1733A>G	rs63751612	37	170	189	66	19.5	154		MYH7	Cardiomyopathy, hypertrophic	14.239	160760	77C>T	rs186964570	47	55	39	3	20	85
MLH1	Colorectal cancer, non-polyposis	3:37089041	120436	1763T>C	rs63750575	16	94	80	43	16	90		MYH7	Cardiomyopathy, hypertrophic	14.239	160760	37G>A	NA	48.5	57.25	40.92	3.08	20	80.25
MLH1	Colorectal cancer, non-polyposis	3:37090099	120436	1988A>G	rs63751682	117	157	121	20	19	112		MYH7	Cardiomyopathy, hypertrophic	14.239	160760	11C>T	NA	45	57	38	3	18	83
MLH1	Colorectal cancer, non-polyposis	3:37090099	120436	1988delA	rs267607877	117	157	121	20	19	112		NF2	Neurofibromatosis 2	22.3004	607379	364-1G>T	NA	2	0	2	0	20	179
MLH1	Colorectal cancer, non-polyposis	3:37090099	120436	1988A>C	rs63751682	117	157	121	20	19	112		NF2	Neurofibromatosis 2	22.3004	607379	364-1G>A	NA	2	0	2	0	20	179
MLH1	Colorectal cancer, non-polyposis	3:37090392	120436	1990-3C>G	rs267607882	119	127	104	24	18	92		NF2	Neurofibromatosis 2	22.3007	607379	1237A>G	NA	162	143	196	60	19.67	124
MLH1	Colorectal cancer, non-polyposis	3:37090464	120436	2059C>T	rs63751275	7	0	5	0	27	21		NF2	Neurofibromatosis 2	22.3007	607379	1340G>C	NA	82	125	144	11	17	126
MLH1	Colorectal cancer, non-polyposis	3:37090471	120436	2066A>G	rs63750702	9	232	89	19	27	150		NF2	Neurofibromatosis 2	22.3007	607379	1340_1340+1insT	NA	82	125	144	11	17	126
MLH1	Colorectal cancer, non-polyposis	3:37090479	120436	2074T>C	NA	9	228	95	25	28	149		NF2	Neurofibromatosis 2	22.3007	607379	1340+1G>A	NA	76	118.67	132	10.5	14.83	120
MLH1	Colorectal cancer, non-polyposis	3:37090498	120436	2093C>G	NA	8	237	96	34	27	148		NF2	Neurofibromatosis 2	22.3007	607379	1340+1G>T	NA	76	118.67	132	10.5	14.83	120
MLH1	Colorectal cancer, early onset	3:37090503	120436	2098C>T	NA	10	221	90.5	36.5	29	166.5		NF2	Neurofibromatosis 2	22.3007	607379	1340+2T>G	NA	73	110	127	7	17	111
MLH1	Gastric cancer	3:37090506	120436	2101C>A	rs63750114	14	221	87	43	30	154		NF2	Neurofibromatosis 2	22.3007	607379	1340+2dupT	NA	73	110	127	7	17	111
MLH1	Colorectal cancer, non-polyposis	3:37090506	120436	2101C>T	rs63750114	14	221	87	43	30	154		NF2	Neurofibromatosis 2	22.3007	607379	1341-2A>C	NA	37	56	54	1	16	69
MLH1	Colorectal cancer, early onset	3:37090508	120436	2103_2103+1delGG	NA	14	221	87	43	30	154		NF2	Neurofibromatosis 2	22.3007	607379	1341-1G>A	NA	63.78	71.67	73.11	7.56	18.83	92.11
MLH1	Colorectal cancer, non-polyposis	3:37090508	120436	2103G>C	rs63750603	14	221	87	43	30	154		NF2	Neurofibromatosis 2	22.3007	607379	1357C>T	NA	69	72	71	7	23	114
MLH1	Colorectal cancer, non-polyposis	3:37090509	120436	2103+1G>A	rs267607888	19	185	89	43	29	141		NF2	Neurofibromatosis 2	22.3007	607379	1366C>T	NA	65.33	72.83	58.83	7	24.83	103.33
MLH1	Colorectal cancer, non-polyposis	3:37090509	120436	2103+1G>T	rs267607888	19	185	89	43	29	141		NF2	Neurofibromatosis 2	22.3007	607379	1375C>T	NA	63	67	52	6	25	104
MLH1	Colorectal cancer, non-polyposis	3:37090511	120436	2103+3A>G	NA	19	182	86	42	24	131		NF2	Neurofibromatosis 2	22.3007	607379	1387G>T	rs74315503	54	66	39	3	24	100
MLH1	Colorectal cancer, non-polyposis	3:37091955	120436	2104-22T>G	rs267607890	17	183	90	43	24	132		NF2	Neurofibromatosis 2	22.3007	607379	1393G>T	NA	49	63	44	3	24	100
MLH1	Colorectal cancer, non-polyposis	3:37091975	120436	2104-2A>G	rs267607889	17	160	94	52	24	116		NF2	Neurofibromatosis 2	22.3007	607379	1396C>T	rs74315504	45	59	36.5	3	23	103.5
MLH1	Colorectal cancer, non-polyposis	3:37091975	120436	2104-2A>T	rs267607889	17	160	94	52	24	116		NF2	Neurofibromatosis 2	22.3007	607379	1408C>T	NA	45	59	35	3	23	104
MLH1	Colorectal cancer, non-polyposis	3:37092026	120436	2153A>C	NA	71	109	123	29	18	95		NF2	Neurofibromatosis 2	22.3007	607379	1417delC	NA	45	59	35	3	23	104
MLH1	Colorectal cancer, non-polyposis	3:37092036	120436	2163T>A	rs63750484	217	153	434	12	25	109		NF2	Neurofibromatosis 2	22.3007	607379	1443C>G	NA	42	60	35	2	20	99
MLH1	Colorectal cancer, non-polyposis	3:37092043	120436	2170T>A	rs63749875	91	0	2	2	27	98		NF2	Neurofibromatosis 2	22.3007	607379	1445delC	NA	41	53	34	2	20	98
MLH1	Colorectal cancer, non-polyposis	3:37092046	120436	2173C>T	rs138584384	22	0	152	43	30	75		NF2	Neurofibromatosis 2	22.3007	607379	1446+1G>A	NA	37	51	33	2	22	97
MLH1	Colorectal cancer, non-polyposis	3:37092047	120436	2174G>A	NA	4	0	58	0	15	9		NF2	Neurofibromatosis 2	22.3007	607379	1574+1G>T	NA	59	142	210	61	17	139
MLH1	Colorectal cancer, non-polyposis	3:37092047	120436	2174delG	NA	4	0	58	0	15	9		NF2	Neurofibromatosis 2	22.3007	607379	1574+1G>C	NA	59	142	210	61	17	139
MSH2	Colorectal cancer, non-polyposis	2:4763044	609309	110delT	rs63751056	172	408	453	112	18	273		NF2	Neurofibromatosis 2	22.3007	607379	1574+1G>A	NA	59	142	210	61	17	139
MSH2	Colorectal cancer	2:47630448	609309	118G>A	rs63751260	151.83	376.5	458.83	103.67	17.5	259.33		NF2	Neurofibromatosis 2	22.3007	607379	1574+2T>C	NA	60	142	212	61	18	143
MSH2	Colorectal cancer, non-polyposis	2:47630449	609309	119delG	rs63750984	147	369	463	102.5	18	255.5		NF2	Neurofibromatosis 2	22.3008	607379	1575-7C>A	NA	63	142	222	66	18	144
MSH2	Colorectal cancer, non-polyposis	2:47630528	609309	198C>G	NA	0	0	0	0	24	0		NF2	Neurofibromatosis 2	22.3008	607379	1575-3C>G	NA	69	155	253	66	19	150
MSH2	Colorectal cancer, non-polyposis	2:47702343	609309	1939G>A	NA	102	407	241	99	17	259		NF2	Neurofibromatosis 2	22.3008	607379	1575-2A>G	NA	69	157	248	66	18	152
MSH2	Colorectal cancer, non-polyposis	2:47702359	609309	1955C>A	NA	112	436	251	98	19	277		NF2	Neurofibromatosis 2	22.3008	607379	1579G>T	rs74315505	71	162	291	64	15	152
MSH2	Colorectal cancer, non-polyposis	2:47707861	609309	2485delC	NA	12	164	369	34	26	118		NF2	Neurofibromatosis 2	22.3008	607379	1581delA	NA	79	161	316	61	18	159
MSH2	Colorectal cancer, non-polyposis	2:47707876	609309	2500G>A	rs63750757	14	266	403	47	21	174		NF2	Neurofibromatosis 2	22.3008	607379	1584delC	NA	82	159	331	62	17	153
MSH2	Colorectal cancer, non-polyposis	2:47707883	609309	2507delT	rs63750008	14	269	410	45	19	175		NF2	Neurofibromatosis 2	22.3008	607379	1598A>C	NA	91	139	322	61	19	136
MSH2	Colorectal cancer, non-polyposis	2:47707892	609309	2516A>G	rs63750027	14	278	413	47	21	175		NF2	Neurofibromatosis 2	22.3008	607379	1616T>A	NA	12	17	112	42	19	299
MSH2	Colorectal cancer, non-polyposis	2:47707897	609309	2521delA	NA	13	284	397	50	21	187		NF2	Neurofibromatosis 2	22.3008	607379	1625T>A	NA	12	17	113	43	19	297
MSH2	Colorectal cancer, non-polyposis	2:47707909	609309	2533A>G	rs63750571	13	293	394	51	20	194		NF2	Neurofibromatosis 2	22.3008	607379	1640delA	NA	14	23	131	43	18	300
MSH2	Colorectal cancer, non-polyposis	2:47707912	609309	2536C>T	rs63750857	15	313	402	51	25	209		NF2	Neurofibromatosis 2	22.3008	607379	1646delT	NA	16	25	137	45	20	304
MSH2	Colorectal cancer, non-polyposis	2:47707917	609309	2541delA	NA	19	340	419.67	47	28.33	213.67		NF2	Neurofibromatosis 2	22.3008	607379	1736A>T	NA	18	29	144	42	23	296
MSH2	Colorectal cancer, non-polyposis	2:4770793	609309	2554G>T	NA	19	370	407	35	32	235		NF2	Neurofibromatosis 2	22.3008	607379	1736A>G	NA	18	29	144	42	23	296
MSH2	Gastric cancer	2:47707978	609309	2602C>G	rs63751400	86.73	102.27	255.13	96.13	18.47	67.93		PCSK9	Hypercholesterolaemia, autosomal dominant	1.55505	607786	NA	NA	8	49	101	28	28	89
MSH2	Gastric cancer	2:47707985	609309	2609C>G	NA	87	101	254	94	19	68		PCSK9	High LDL cholesterol	1.55506	607786	10G>A	rs186669805	9	49	93	27	27	89
MSH6	Colorectal cancer, non-polyposis	2:48026566	600678	1444C>T	rs63750909	85	223	254	19	35	159		PCSK9	Hypocholesterolaemia	1.5551	607786	341T>C	NA	41	84	188	45	19	56
MSH6	Colorectal cancer, non-polyposis	2:48026575	600678	1453C>T	rs63751042	91	226	271	19	34	167		PCSK9	Hypercholesterolaemia, autosomal dominant	1.5551	607786	381T>A	rs28942111	39	89.5	184	47.5	19	58
MSH6	Colorectal cancer, non-polyposis	2:48026596	600678	1474A>G	rs61754783	91	224	269	19	34	167		PCSK9	Hypercholesterolaemia	1.5551	607786	385G>A	NA	39	91	181	48	19	58
MSH6	Colorectal cancer, non-polyposis	2:48026724	600678	1602delC	rs63751234	18	179	169	92	34	140		PCSK9	Hypercholesterolaemia	1.55523	607786	1120G>C	NA	68	79	297	88	19	88
MSH6	Endometrial cancer	2:48026798	600678	1676G>A	rs63750595	18	217	219	39	35	154		PCSK9	Hypercholesterolaemia, autosomal dominant	1.55523	607786	1120G>T	rs137852912	68	79	297	88	19	88
MSH6	Colorectal cancer	2:48026818	600678	1696G>A	rs63749973	19	215	223	40	36	156		PCSK9	Hypocholesterolaemia	1.55525	607786	1564G>A	NA	105	69	329	24	18	160
MSH6	Colorectal cancer, non-polyposis	2:4802686	600678	1738delT	NA	0	0	2	2	35	0		PCSK9	High LDL cholesterol, association with	1.55525	607786	1658A>G	rs28362270	98	61	355	19	26	166
MSH6	Colorectal cancer	2:48027482	600678	2360C>T	rs63750637	87	116	239	28	17	87		PCSK9	Low LDL cholesterol, association with	1.55525	607786	1660C>G	rs149311926	89	60	349	15	26	164
MSH6	Colorectal cancer, non-polyposis	2:48027497	600678	2375T>C	NA	92.7	114.7	246.4	27.1	19.2	83.9		PCSK9	Hypocholesterolaemia	1.55527	607786	1847C>T	NA	89	60	349	15	26	164
MSH6	Colorectal cancer, non-polyposis	2:48027625	600678	2503C>T	rs63751321	92	111	256	28	19	82		PCSK9	Hypercholesterolaemia	1.55527	607786	1850C>A	NA	86.67	56.33	352	14.67	22.67	163
MSH6	Colorectal cancer	2:48027626	600678	2504delA	NA	95	117	256	28	19	86		PCSK9	High LDL cholesterol	1.55527	607786	1863+6G>A	NA	88	51	360	15	26	155
MSH6	Colorectal cancer, non-polyposis	2:48027671	600678	2549A>G	rs63750389	103	107	248	30	19	81		PCSK9	High LDL cholesterol	1.55529	607786	1870G>A	NA	89	49	366	15	25	155
MSH6	Colorectal cancer, non-polyposis	2:48027726	600678	2604delG	NA	111	110	302	29	18	94		PCSK9	Low LDL cholesterol	1.55529	607786	2004C>A	NA	86	49	363	17	25	157
MSH6	Colorectal cancer	2:48027937	600678	2815C>T	rs63750140	130	229	376	69	19	143		PCSK9	Atherosclerosis, severity, association with	1.55529	607786	2009A>G	rs505151	78	43	370	15	24	156
MSH6	Colorectal cancer	2:48028049	600678	2927G>A	rs63751113	126	226	362	60	19	134		PCSK9	Low LDL cholesterol, association with	1.55529	607786	2037C>A	rs28362286	78	42	377	14	24	154
MSH6	Colorectal cancer	2:4803067	600678	3284G>A	rs63750253	241	482	366	12	23	268		PMS2	Azoospermia/oligozoospermia, association with	7.60173	600259	2324G>A	rs17420802	76	127	393	28	19	199
MSH6	Colorectal cancer	2:48030685	600678	3299C>T	rs63750442	226	476	363	10	27	253		PMS2	Colorectal cancer, non-polyposis	7.60183	600259	2249G>A	NA	79	128	399	30	18	212
MSH6	Colorectal cancer, non-polyposis	2:48030706	600678	3320delA	rs63750377	225	446	368	11	29	257		PMS2	Colorectal cancer, non-polyposis	7.60296	600259	1021delA	rs63750049	19	28	139	73	29	120
MSH6	Colorectal cancer, early onset	2:4803073	600678	3344T>C	NA	208	429	369	11	31	243		PMS2	Turcot syndrome	7.60296	600259	989-1G>T	NA	18	28	138	69	31	124
MSH6	Colorectal cancer, non-polyposis	2:48030741	600678	3355G>T	rs267608084	196	411	362	9	30	227		PMS2	Colorectal cancer, non-polyposis	7.60316	600259	949C>T	rs143277125	18	30	134	68	28	121
MSH6	Ovarian cancer	2:48030793	600678	3407A>G	NA	162	369	325	7	33	204		PMS2	Colorectal cancer, non-polyposis	7.60316	600259	943C>T	rs200640585	19	32	136	73	31	137
MSH6	Colorectal cancer, non-polyposis	2:48030793	600678	3407delA	NA	162	369	325	7	33	204		PMS2	Colorectal cancer, non-polyposis	7.60388	600259	620G>A	NA	45	70	217	68	15	166
MSH6	Colorectal cancer, non-polyposis	2:48030801	600678	3415G>A	rs63751063	0	0	2	0	35	2		PMS2	Colorectal cancer, non-polyposis	7.60388	600259	614A>C	NA	50	74	261	69	16	146
MSH6	Muir-Torre syndrome	2:48030822	600678	3436C>T	rs63750356	0	0	3	0	32	0		PMS2	Colorectal cancer, non-polyposis	7.60389	600259	543delT	rs63751029	52	75	262	74	17	139
MSH6	Colorectal cancer, non-polyposis	2:48032763	600678	3563G>A	NA	52	189	449	16	20	118		PMS2	Colorectal cancer, non-polyposis	7.60421	600259	537+1G>T	NA	50	78	242	70	17	130
MSH6	Ovarian cancer	2:48033498	600678	3801+1delG	NA	54	222	432	30	19	166		PMS2	Colorectal cancer, non-polyposis	7.60455	600259	163+2T>C	NA	263	335	265	178	19	433
MSH6	Colorectal cancer	2:48033977	600678	4061T>A	rs267608140	14	44	97	40	33	113		PTEN	Cowden disease	10.8962	601728	NA	NA	186	233	273	138	19	281
MSH6	Colorectal cancer	2:48034014	600678	NA	NA	24	52	76	17	29	195		PTEN	Cowden disease	10.8969	601728	370T>C	rs121909223	39	26	48	0	22	49
MUTYH	Colorectal adenoma	1:45796869	604933	1461delC	NA	1	122	144	55	18	81		PTEN	Cowden disease	10.8969	601728	370delT	NA	39	26	48	0	22	49
MUTYH	Colorectal adenoma	1:45796892	604933	1438G>T	rs121908381	1	104	205	46	23	82		PTEN	Cowden disease	10.8969	601728	371G>C	NA	37.62	53.25	59.25	0	32.12	66.62
MUTYH	Adenomatous polyposis coli	1:45796895	604933	1435G>T	NA	1	86	201	50	25	80		PTEN	Cowden disease	10.8969	601728	371G>A	NA	37.62	53.25	59.25	0	32.12	66.62
MUTYH	Colorectal cancer	1:45796899	604933	1431G>C	rs74318065	1	67	170	46	26	72		PTEN	Cowden disease	10.8969	601728	372T>G	NA	0	0	0	0	31	3
MUTYH	MYH polyposis	1:45796912	604933	1418C>A	rs200844166	1	26	130	40	28	76		PTEN	Cowden disease	10.8969	601728	376G>C	NA	44	2	13	1	33	353
MUTYH	Colorectal cancer	1:45796913	604933	1417G>A	rs192816572	2	14	82	24	14	42		PTEN	Cowden disease	10.8969	601728	379G>A	NA	33	5	15	10	21	307
MUTYH	Adenomatous polyposis coli	1:45797139	604933	1276C>T	rs150792276	18	60	70	51	35	60		PTEN	Bannayan-Riley-Ruvalcaba syndrome	10.8969	601728	403A>G	NA	48	58	262	46	19	107
MUTYH	Colorectal cancer	1:45797157	604933	1258C>A	rs144079536	17	60	71	51	37	61		PTEN	Cowden disease	10.8969	601728	476G>C	NA	24	67	69	19	25	116
MUTYH	Adenomatous polyposis coli	1:45797228	604933	1187G>A	rs36053993	25	55	75	171	19	66		PTEN	Breast cancer	10.8969	601728	482G>A	NA	23	66	60	19	22	114
MUTYH	Colorectal adenoma	1:45797372	604933	1147delC	NA	54.5	113.14	32.86	9.36	27	92.57		PTEN	Cowden disease	10.8969	601728	486C>G	NA	25	65	52	16	17	104
MUTYH	MYH polyposis	1:45797381	604933	1138C>A	NA	54	110	34	8	28	90		PTEN	Cowden disease	10.8969	601728	491delA	NA	0	0	2	0	44	20
MUTYH	Adenomatous polyposis coli	1:45797385	604933	1134delA	NA	50	108	40	9	27	85		PTEN	Cowden disease	10.8971	601728	586_587insT	NA	47.67	242	180	91	18	177.33
MUTYH	Colorectal adenoma	1:45797401	604933	1118C>T	rs35352891	43	110	46	14	23	76		PTEN	Bannayan-Zonana syndrome	10.8971	601728	586delC	NA	47.67	242	180	91	18	177.33
MUTYH	Multiple colorectal adenomas	1:45797418	604933	1101delC	NA	43	110	46	14	23	76		PTEN	Cowden disease	10.8971	601728	589A>T	NA	47	243	179	93	18	177
MUTYH	Adenomatous polyposis coli	1:45797481	604933	1038G>A	NA	38	121	86	15	23	63		PTEN	Cowden disease	10.8971	601728	592delA	NA	46	248	186	95	18	179
MUTYH	Reduced activity	1:45797505	604933	1014G>C	rs3219489	38	132	110	17	24	58		PTEN	Cowden / Bannayan-Riley-Ruvalcaba syndromes	10.8971	601728	599T>C	NA	55	256	180	101	18	184
MUTYH	Colorectal cancer	1:45797506	604933	1013A>G	rs199742231	38	135	122	17	25	59		PTEN	Cowden disease	10.8971	601728	613A>G	NA	64	272	186	103	19	197
MUTYH	Colorectal cancer	1:45797507	604933	1012C>T	NA	40	135	122	17	25	60		PTEN	Breast cancer	10.8971	601728	621T>G	NA	65	265	191	113	18	198
MUTYH	Adenomatous polyposis coli	1:45797522	604933	998-1G>T	NA	41	140	116	16	23	58		PTEN	Proteus syndrome	10.8971	601728	633C>A	rs121909232	64	267	202	113	17	199
MUTYH	Colon cancer	1:45797534	604933	998-13T>G	NA	46	142	134	18	25	62		PTEN	Cowden disease	10.8971	601728	634+1G>T	NA	65	232	217	92	16	180
MUTYH	Colorectal cancer	1:45797752	604933	940C>T	NA	48	140	134	18	26	61		PTEN	Cowden disease	10.8971	601728	634+2T>C	NA	68	239	204	88	16	182
MUTYH	Multiple colorectal adenomas	1:45798246	604933	690G>A	rs199989617	85.6	155.6	192	19.6	30.8	61.6		PTEN	Bannayan-Riley-Ruvalcaba syndrome	10.8971	601728	634+5G>T	NA	69	245	230	98	16	182
MUTYH	MUTYH-associated polyposis	1:45798246	604933	690G>A	rs199989617	85.6	155.6	192	19.6	30.8	61.6		PTEN	Bannayan-Riley-Ruvalcaba syndrome	10.8971	601728	634+5G>A	rs138336847	69	245	230	98	16	182
MUTYH	Adenomatous polyposis coli	1:45798269	604933	667A>G	rs200872702	88	153	184	17	35	63		PTEN	Autism spectrum disorders, developmental delay and macrocephaly	10.8972	601728	635-3C>G	NA	71	243	232	100	17	187
MUTYH	Multiple colorectal adenomas	1:45798289	604933	647G>A	NA	88	154	169	16	35	63		PTEN	Cowden disease	10.8972	601728	635-1G>C	NA	69	244	237	101	17	186
MUTYH	MUTYH-associated polyposis	1:45798293	604933	643G>A	NA	84	139	145	16	32	57		PTEN	Developmental delay and macrocephaly	10.8972	601728	635-1G>A	NA	69	244	237	101	17	186
MUTYH	MYH polyposis	1:45798308	604933	628C>T	NA	87	138	133	17	25	55		PTEN	Bannayan-Zonana syndrome	10.8972	601728	640C>T	rs121909227	69	248	243	104	19	189
MUTYH	Colorectal cancer	1:4579835	604933	586G>T	NA	76	139	113	13	24	53		PTEN	Cowden disease	10.8972	601728	650T>A	NA	68	245	234	104	19	189
MUTYH	MYH polyposis	1:45798445	604933	566G>A	NA	85	159	135	10	20	60		PTEN	Cowden disease	10.8972	601728	654C>A	NA	68	240	256	103	17	193
MUTYH	Adenomatous polyposis coli	1:45798457	604933	554G>A	NA	69	119	102	9	20	50		PTEN	Cowden disease	10.8972	601728	655C>T	NA	64	239	254	109	17	200
MUTYH	Adenomatous polyposis coli	1:45798458	604933	553C>T	NA	93	178	116	14	24	75		RB1	Retinoblastoma	13.4893	614041	619C>T	NA	112	173	381	100	19	153
MUTYH	Colorectal adenoma	1:4579846	604933	551G>A	NA	92	182	121	15	24	79		RB1	Retinoblastoma	13.4894	614041	908T>A	NA	65	96	395	53	19	128
MUTYH	MYH polyposis	1:45798466	604933	545G>A	NA	81	168	118	9	27	75		RB1	Retinoblastoma	13.4894	614041	928G>T	NA	64	92	377	54	17	128
MUTYH	MUTYH-associated polyposis	1:45798467	604933	544C>G	NA	76	165	123	7.5	26.5	71.5		RB1	Retinoblastoma	13.4894	614041	929G>A	rs200844292	64	88	379	55	18	125
MUTYH	Adenomatous polyposis coli	1:45798467	604933	544C>T	NA	76	165	123	7.5	26.5	71.5		RB1	Retinoblastoma	13.4894	614041	929delG	NA	64	88	379	55	18	125
MUTYH	Colorectal cancer	1:45798472	604933	539A>C	NA	68	148	123	8	29	61		RB1	Retinoblastoma	13.4894	614041	931delC	NA	63	87	376	56	19	124
MUTYH	Adenomatous polyposis coli	1:45798475	604933	536A>G	rs34612342	65	124	121	7	30	57		RET	Thyroid carcinoma, medullary	10.4362	164761	2720A>T	NA	58	153	417	116	18	188
MUTYH	Adenomatous polyposis coli	1:4579849	604933	521G>A	NA	18	113	197	59	23	73		RET	Hirschsprung disease	10.4362	164761	2720A>C	NA	58	153	417	116	18	188
MUTYH	MYH polyposis	1:45798624	604933	470C>T	NA	18	112	194	59	23	74		RET	Hirschsprung disease	10.4362	164761	2735G>A	NA	54	144	393	106	18	179
MUTYH	Adenomatous polyposis coli	1:45799139	604933	294delG	NA	17	93	199	44	32	88		RET	Thyroid cancer	10.4362	164761	2735G>C	rs78347871	54	144	393	106	18	179
MUTYH	Colorectal adenoma	1:45799144	604933	289C>T	rs138775799	17	93	199	44	32	88		RET	Thyroid carcinoma, medullary	10.4362	164761	2752A>G	NA	56	144	417	105	19	174
MUTYH	MUTYH-associated polyposis	1:45799192	604933	241G>T	NA	14	78	137	37	31	77		RET	Multiple endocrine neoplasia 2B	10.4362	164761	2753T>C	rs74799832	56	144	417	105	19	174
MUTYH	Adenomatous polyposis coli	1:45800146	604933	74G>A	rs75321043	13	72	124	32	30	75		RET	Hirschsprung disease	10.4362	164761	2761G>A	NA	52	142	403	100	18	167
MUTYH	MUTYH-associated polyposis	1:45800165	604933	55C>T	NA	12	69	119	36	33	76		RET	Hirschsprung disease	10.4362	164761	2761G>T	NA	52	142	403	100	18	167
MUTYH	Adenomatous polyposis coli	1:45800167	604933	53C>T	rs79777494	8	73	107	30	29	73		RET	Thyroid cancer	10.4362	164761	2764T>C	NA	51	135.5	393.5	102	19	158
MYBPC3	Cardiomyopathy, hypertrophic	11:47353705	600958	3732C>A	NA	97	183	62	14	24	144		RET	Hirschsprung disease	10.4362	164761	2825G>A	NA	49	129	386	97	16	154
MYBPC3	Cardiomyopathy, hypertrophic	11:47353781	600958	3656T>C	NA	56	1	2	58	27	206		RET	Aganglionosis, total colonic	10.4362	164761	2826G>C	NA	49	128	373	95	18	156
MYBPC3	Cardiomyopathy, left ventricular noncompaction	11:47354145	600958	3599T>C	NA	64	113	333	10	22	71		RYR1	Myopathy, congenital	19.3893	180901	119G>T	NA	132	161	281	132	19	190
MYBPC3	Cardiomyopathy, hypertrophic	11:4735416	600958	3584G>T	NA	65	119	385	11	21	74		RYR1	Myopathy, congenital	19.3893	180901	122T>C	NA	131	166	300	136	18	192
MYBPC3	Cardiomyopathy, hypertrophic	11:47354164	600958	3580G>A	NA	66	127	448	10	20	72		RYR1	Malignant hyperthermia	19.3893	180901	130C>T	rs193922748	133	163	320	144	17	202
MYBPC3	Cardiomyopathy, hypertrophic	11:47354184	600958	3560T>G	NA	75.38	131.38	595.12	19.88	32.5	75.62		RYR1	Malignant hyperthermia	19.3893	180901	131G>A	rs139161723	144	164	332	144	18	209
MYBPC3	Cardiomyopathy, hypertrophic	11:47354229	600958	3515A>G	NA	124	169	309	18	25	106		RYR1	Malignant hyperthermia	19.3893	180901	152C>A	rs193922749	154.33	178.33	359	150.67	16	234.67
MYBPC3	Cardiomyopathy, hypertrophic	11:47354518	600958	3337T>A	NA	126	246	19	48	29	193		RYR1	Central core disease	19.3893	180901	178G>A	rs118192160	155	180	355	150	16	239
MYBPC3	Cardiomyopathy, hypertrophic	11:47356616	600958	2882C>T	NA	76	159	385	19	38	113		RYR1	Malignant hyperthermia	19.3893	180901	190T>C	NA	163	189	337	158	12	243
MYBPC3	Cardiomyopathy, hypertrophic	11:47357511	600958	2654C>T	NA	34	15	7	40	38	16		RYR1	Malignant hyperthermia	19.3893	180901	212C>A	rs118192113	163	195	334	161	13	238
MYBPC3	Cardiomyopathy, hypertrophic	11:47359115	600958	2429G>A	NA	68	160	292	74	17	143		RYR1	Multi-minicore disease	19.3893	180901	325C>T	rs118192173	160	192	336	158	15	236
MYBPC3	Cardiomyopathy, hypertrophic	11:47359115	600958	2429G>T	NA	68	160	292	74	17	143		RYR1	Myopathy, congenital	19.3893	180901	336C>G	NA	166	194	340	153	18	241
MYBPC3	Cardiomyopathy, hypertrophic	11:47359241	600958	2413G>A	NA	70	158	346	92	18	147		RYR1	Central core disease	19.3893	180901	479A>G	rs193922752	178	193	317	138	18	245
MYBPC3	Cardiomyopathy, hypertrophic	11:47359272	600958	2382delG	NA	67	155	308	92	17	142		RYR1	Central core disease	19.3893	180901	487C>T	rs118192161	178	197	326	136	19	241
MYBPC3	Cardiomyopathy, hypertrophic	11:4735928	600958	2373dupG	NA	70	159	336	91	19	144		RYR1	Malignant hyperthermia	19.3894	180901	1100G>T	rs113332073	18	64	144	26	38	64
MYBPC3	Cardiomyopathy, hypertrophic	11:4735928	600958	2374T>C	rs187830361	70	159	336	91	19	144		RYR1	Malignant hyperthermia	19.3894	180901	1100G>A	rs113332073	18	64	144	26	38	64
MYBPC3	Cardiomyopathy, hypertrophic	11:47359307	600958	2347G>C	NA	75	157	326	96	17	140		RYR1	Malignant hyperthermia	19.3894	180901	1144C>A	NA	17	65	154	27	39	67
MYBPC3	Cardiomyopathy, hypertrophic	11:47359307	600958	2347G>T	NA	75	157	326	96	17	140		RYR1	Malignant hyperthermia	19.3894	180901	1201C>T	rs193922764	17	74	173	27	38	72
MYBPC3	Cardiomyopathy, hypertrophic	11:47359334	600958	2320G>A	NA	76	160	305	101	19	141		RYR1	Malignant hyperthermia	19.3894	180901	1201C>A	NA	17	74	173	27	38	72
MYBPC3	Cardiomyopathy, hypertrophic	11:47360106	600958	2273G>A	NA	77	148	298	108	19	113		RYR1	Malignant hyperthermia	19.3894	180901	1201C>G	rs193922764	17	74	173	27	38	72
MYBPC3	Cardiomyopathy, hypertrophic	11:47360114	600958	2265C>A	NA	77	135	256	102	17	111		RYR1	Malignant hyperthermia	19.3894	180901	1202G>T	NA	19	76	177	26	35	79
MYH7	Cardiomyopathy, dilated	14:2388501	160760	4985G>A	NA	216	296	301	18	31	168		RYR1	Malignant hyperthermia	19.3894	180901	1202G>A	rs193922766	19	76	177	26	35	79
MYH7	Cardiomyopathy, hypertrophic	14:23891501	160760	3133C>T	rs45611033	88	111	179	15	40	84		RYR1	Malignant hyperthermia	19.3895	180901	1841G>T	rs193922772	6	14	53	77	17	24
MYH7	Cardiomyopathy, hypertrophic	14:23891503	160760	3131T>C	NA	84	104	169	14	33	83		RYR1	Myopathy, congenital	19.3895	180901	1931G>T	NA	14	16	84	98	25	39
MYH7	Cardiomyopathy, dilated	14:23891521	160760	3113T>C	NA	88	99	178	16	28	80		RYR1	Myopathy, congenital	19.3895	180901	1983G>A	NA	14	16	92	102	25	42
MYH7	Cardiomyopathy, hypertrophic	14:23894569	160760	2345G>A	NA	75	1	11	219	37	82		RYR1	Myopathy, congenital	19.3895	180901	2113G>C	NA	19	27	89	116	26	53
MYH7	Cardiomyopathy, hypertrophic	14:23894569	160760	2344_2345delAGinsGA	NA	75	1	11	219	37	82		RYR1	Malignant hyperthermia	19.3898	180901	5183C>T	rs193922781	138	173	331	36	16	150
MYH7	Cardiomyopathy, hypertrophic	14:23894577	160760	2337G>C	NA	147	115	67	1	29	66		RYR1	Malignant hyperthermia	19.3898	180901	5186T>G	rs193922782	123	169	305	30	19	145
MYH7	Cardiomyopathy, hypertrophic	14:23894579	160760	2335G>T	NA	106	339	216	41	14	240		RYR1	Myopathy, congenital	19.3898	180901	5510A>C	NA	0	0	2	0	34	41
MYH7	Cardiomyopathy, hypertrophic	14:2389458	160760	2334C>G	NA	92	338	205	37	16	245		RYR1	Myopathy, congenital	19.3898	180901	5749G>T	NA	14	157	196	195	34	190
MYH7	Cardiomyopathy, hypertrophic	14:2389458	160760	2334C>A	NA	92	338	205	37	16	245		RYR1	Multi-minicore disease	19.3898	180901	5869T>A	rs192932788	15	157	198	195	36	194
MYH7	Cardiomyopathy, hypertrophic	14:23894983	160760	2207T>C	NA	19	108	334	46	31	78		RYR1	Myopathy, congenital	19.3898	180901	5908C>T	NA	15	157	195	193	38	192
MYH7	Cardiomyopathy, hypertrophic	14:23895001	160760	2189T>C	NA	12	139	145	102	34	112		RYR1	Myopathy, congenital with cores	19.3898	180901	5938delC	NA	13	154	219.67	187.67	39	195
MYH7	Cardiomyopathy, hypertrophic	14:23895005	160760	2185G>C	NA	11	135	141	88	34	105		RYR1	Malignant hyperthermia	19.3898	180901	6037A>C	NA	13	152	221	189	38	196
MYH7	Cardiomyopathy, non-compaction, left ventricular	14:23896058	160760	1972C>G	NA	77	319	356	52	19	176		RYR1	Fibre type disproportion, congenital	19.3898	180901	6104A>T	NA	13	154	218	186	36	197
MYH7	Cardiomyopathy, dilated	14:23896496	160760	1909A>G	NA	141	205	769	17	24	146		RYR1	Malignant hyperthermia	19.3899	180901	6304G>C	NA	11	150	225	190	37	198
MYH7	Cardiomyopathy, dilated	14:23896502	160760	1903A>T	NA	150	205	757	19	27	147		RYR1	Malignant hyperthermia	19.3899	180901	6349G>C	rs193922788	12	140	233	201	36	190
MYH7	Cardiomyopathy, hypertrophic	14:23896812	160760	1870T>A	NA	139	191	565	17	28	136		RYR1	Malignant hyperthermia	19.3899	180901	6387C>G	rs117886618	13	138	223	190	37	186
MYH7	Cardiomyopathy, hypertrophic	14:23896839	160760	1843A>C	NA	125.33	156.33	101.67	11.33	36.67	91.67		RYR1	Malignant hyperthermia	19.3899	180901	6388G>A	rs193922789	13	130	216	184	35	183
MYH7	Cardiomyopathy, hypertrophic	14:23896856	160760	1826A>G	NA	124	176	105	14	32	90		RYR1	Malignant hyperthermia & exertional rhabdomyolosis	19.3899	180901	6478G>A	rs143398211	14	130	219	179	33	184
MYH7	Cardiomyopathy, hypertrophic	14:23896881	160760	1801C>T	NA	113	286	568	16	44	178		RYR1	Malignant hyperthermia	19.3899	180901	6487C>T	rs118192175	14	129.67	216	179.67	31	180
MYH7	Cardiomyopathy, hypertrophic	14:23896881	160760	1801C>G	NA	113	286	568	16	44	178		RYR1	Malignant hyperthermia	19.3899	180901	6488G>A	rs118192163	14	130	217	180	30	179
MYH7	Cardiomyopathy, dilated	14:2389691	160760	1772T>C	NA	59	67	321	7	24	47		RYR1	Malignant hyperthermia	19.3899	180901	6488G>C	rs118192163	14	130	217	180	30	179
MYH7	Cardiomyopathy, hypertrophic	14:23896922	160760	1760A>T	NA	111	128	364	16	24	103		RYR1	Malignant hyperthermia	19.3899	180901	6838G>A	rs193922797	45	103	163	154	13	116
MYH7	Cardiomyopathy, hypertrophic	14:23897792	160760	1495G>A	rs3218715	128	151	143	9	26	82		RYR1	Multi-minicore disease	19.3899	180901	6847A>C	rs118192121	49	106	163	157	14	118
MYH7	Cardiomyopathy, hypertrophic	14:23897796	160760	1491G>T	rs267606911	128	121	95	7	23	66		RYR1	Malignant hyperthermia	19.3899	180901	6961A>G	rs34390345	51	113	177	156	16	120
MYH7	Cardiomyopathy, hypertrophic	14:2389781	160760	1477A>T	NA	124	114	122	11	20	62		RYR1	Myopathy, congenital	19.3899	180901	7006C>T	NA	58	108	181	156	13	120
MYH7	Cardiomyopathy, dilated	14:23897864	160760	1423C>A	NA	29	36	105	23	3	18		RYR1	Malignant hyperthermia	19.3899	180901	7007G>A	rs112563513	68	114	184	145	10	129
MYH7	Cardiomyopathy, dilated	14:23898166	160760	1405G>T	NA	24	73	115	30	9	36		RYR1	Malignant hyperthermia	19.3899	180901	7063C>T	rs193922803	84	105	257	44	19	111
MYH7	Cardiomyopathy, dilated	14:23898169	160760	1402T>C	NA	24	74	117	31	8	35		RYR1	Malignant hyperthermia	19.3899	180901	7075C>T	NA	83	103	251	46	17	107
MYH7	Cardiomyopathy, hypertrophic	14:23898171	160760	1400T>C	NA	51	90	201	44	15	42		RYR1	Malignant hyperthermia	19.3899	180901	7085A>G	rs193922804	62	115	343	63	15	101
MYH7	Cardiomyopathy, hypertrophic	14:23898172	160760	1399A>C	NA	84	121	249	54	10	73		RYR1	Malignant hyperthermia	19.3899	180901	7090T>G	rs193922805	58	115	393	64	19	103
MYH7	Cardiomyopathy, hypertrophic	14:23898201	160760	1370T>C	NA	119.67	157.33	297.33	90	16.33	86		RYR1	Malignant hyperthermia	19.3899	180901	7097C>G	rs193922806	55	118	411	67	17	109
MYH7	Cardiomyopathy, dilated	14:23898246	160760	1325G>A	NA	11	29	119	54	25	18		RYR1	Malignant hyperthermia	19.3899	180901	7099G>A	rs146306934	61	120	455	78	19	117
MYH7	Cardiomyopathy, hypertrophic	14:23898247	160760	1324C>T	rs148808089	9	49	160	78	16	36		RYR1	Central core disease	19.3899	180901	7304G>T	rs28933396	86	175	359	116	19	183
MYH7	Cardiomyopathy & distal myopathy	14:23898249	160760	1322C>T	rs121913653	17	65	223	60	19	39		RYR1	Central core disease	19.3899	180901	7304G>A	rs28933396	86	175	359	116	19	183
MYH7	Cardiomyopathy, non-compaction	14:23900669	160760	754T>C	NA	0	226	197	607	28	190		RYR1	Malignant hyperthermia	19.3899	180901	7358T>C	rs118192123	50	85	400	34	14	69
MYH7	Cardiomyopathy, hypertrophic	14:23900672	160760	751C>A	NA	0	238	482	491	34	184		RYR1	Malignant hyperthermia	19.3899	180901	7360C>T	rs193922816	50	86	390	35	14	66
MYH7	Cardiomyopathy, hypertrophic	14:23900677	160760	746G>A	rs3218713	19	247	388	591	24	190		RYR1	Malignant hyperthermia	19.3899	180901	7361G>A	rs118192122	53	79	464	39	19	59
MYH7	Cardiomyopathy, hypertrophic	14:23900687	160760	736A>C	NA	2	224	366	955	28	207		RYR1	Muscular dystrophy and arthrogryposis	19.39	180901	8554C>T	NA	76	201	240	48	19	211
MYH7	Cardiomyopathy, non-compaction	14:23900791	160760	732+3G>C	NA	2	223	368	956	28	209		RYR1	Myopathy, congenital	19.39	180901	8692+131G>A	NA	14	127	178	42	27	166
MYH7	Cardiomyopathy, non-compaction	14:23900793	160760	732+1G>A	NA	1	221	381	840	35	214		RYR1	Myopathy, congenital	19.39	180901	8816G>A	rs118192125	7	141	251	55	24	200
MYH7	Cardiomyopathy, hypertrophic	14:23900796	160760	730T>C	NA	0	252	257	734	28	149		RYR1	Fibre type disproportion, congenital	19.39	180901	9000+1G>T	NA	8	137	333	66	25	192
MYH7	Cardiomyopathy, hypertrophic	14:23900798	160760	728G>A	rs267606910	0	267	287	713	25	155		RYR1	Myopathy, congenital	19.39	180901	9062C>T	NA	7	123	363	66	27	156
MYH7	Cardiomyopathy, hypertrophic	14:23900799	160760	727C>T	NA	0	225	415	774	28	142		RYR1	Myopathy, congenital	19.39	180901	9172+1G>A	NA	7	126	359	64	29	158
MYH7	Cardiomyopathy, hypertrophic	14:2390088	160760	646C>G	NA	78	117	122	19	34	89		RYR1	Myopathy, congenital	19.39	180901	9242T>C	rs147012990	8	119	356	61	22	151
MYH7	Cardiomyopathy, hypertrophic	14:23900885	160760	641G>A	NA	75	120	117	18	37	90		RYR1	Malignant hyperthermia	19.39	180901	9310G>A	rs193922832	7	119	339	59	21	145
MYH7	Cardiomyopathy, hypertrophic	14:23900977	160760	632C>T	NA	54	87	21	19	18	59		RYR1	Fibre type disproportion, congenital	19.3901	180901	10204T>G	rs145944224	106	152	384	126	18	157
MYH7	Cardiomyopathy, hypertrophic	14:23900996	160760	613A>T	NA	52	102	19	17	29	77		RYR1	Multi-minicore disease	19.3902	180901	10579C>T	rs118192164	15	33	183	69	24	60
MYH7	Cardiomyopathy, hypertrophic	14:23900998	160760	611G>A	NA	41	110	13	18	28	83		RYR1	Central core disease	19.3902	180901	10616G>A	rs143987857	9	13	127	53	21	49
MYH7	Cardiomyopathy, dilated	14:23901007	160760	602T>C	NA	38	107	14	20	23	74		RYR1	Axial myopathy, late-onset	19.3902	180901	10621G>A	NA	9	14	122	52	23	48
MYH7	Cardiomyopathy	14:23901013	160760	596C>T	NA	39	106	14	21	22	75		RYR1	Central core disease	19.3902	180901	10817T>C	rs118192127	6.45	53.45	345.64	34.09	30.36	93.45
MYH7	Cardiomyopathy, hypertrophic	14:23901023	160760	586G>A	NA	35	101	14	22	25	82		RYR1	Malignant hyperthermia	19.3902	180901	11120G>T	rs193922838	7	56	348	36	28	96
MYH7	Cardiomyopathy, hypertrophic	14:23901028	160760	581A>C	NA	35	101	14	23	24	89		RYR1	Malignant hyperthermia	19.3902	180901	11126C>T	NA	10	68	380	43	30	103
MYH7	Cardiomyopathy, hypertrophic	14:2390104	160760	569G>C	NA	36	108	15	24	24	93		RYR1	Myopathy, congenital	19.3907	180901	14437C>T	NA	172	218	265	39	19	259
MYH7	Cardiomyopathy, hypertrophic	14:23901046	160760	563C>A	NA	31	109	16	16	22	95		RYR1	Central core disease	19.3907	180901	14440C>T	rs118192142	169	208	259	36	19	252
MYH7	Cardiomyopathy, hypertrophic	14:23901048	160760	561C>G	NA	30	108	15	14	20	98		RYR1	Malignant hyperthermia	19.3907	180901	14449A>T	rs143988412	163	207	252	36	18	251
MYH7	Cardiomyopathy, hypertrophic	14:23901053	160760	556G>C	NA	29	102	14	13	19	107		RYR1	Myopathy, congenital with cores	19.3907	180901	14524G>A	rs193922879	68	112	543	106	18	130
MYH7	Cardiomyopathy, hypertrophic	14:23901077	160760	532G>A	NA	28	94	11	12	21	111		RYR1	Central core disease	19.3907	180901	14545G>A	rs118192168	59	115	527	111	19	140
MYH7	Cardiomyopathy, hypertrophic	14:23901688	160760	530C>T	NA	25	94	13	12	24	110		RYR1	Central core disease	19.3908	180901	14741G>C	rs118192154	29	94	126	16	23	90
MYH7	Cardiomyopathy	14:23901713	160760	505A>G	NA	34	47	35	9	23	118		RYR1	Myopathy, congenital	19.3908	180901	14749T>C	NA	28	113	177	13	27	101
MYH7	Cardiomyopathy, hypertrophic	14:23901865	160760	485A>G	NA	39	48	33	9	24	102		RYR1	Central core disease	19.3908	180901	14752G>A	NA	38	139	197	11	29	101
MYH7	Cardiomyopathy, hypertrophic	14:23901866	160760	484T>C	NA	40	50	33	9	26	102		RYR1	Central core disease	19.3908	180901	14759C>A	rs118192155	40	138	199	10	31	103
MYH7	Cardiomyopathy, hypertrophic	14:23901907	160760	443G>T	NA	40	52	34	6	26	102		RYR2	Catecholaminergic polymorphic ventricular tachycardia	1.23749	180902	184C>T	NA	76	42	355	14	22	152
MYH7	Cardiomyopathy, hypertrophic	14:23901912	160760	438G>T	NA	36	56	36	7	23	95		RYR2	Arrhythmogenic right ventricular dysplasia type 2	1.23749	180902	230C>T	NA	74	41	363	13	23	154
MYH7	Cardiomyopathy, hypertrophic	14:23901922	160760	428G>A	NA	40	58	33	8	23	88		RYR2	Catecholaminergic polymorphic ventricular tachycardia	1.23749	180902	241A>C	NA	76	41	352	15	24	157
MYH7	Cardiomyopathy, hypertrophic	14:23901923	160760	427C>G	NA	40	58	33	8	23	88		RYR2	Ventricular tachycardia, polymorphic	1.23754	180902	490C>T	NA	74	39	352	16	24	151
MYH7	Cardiomyopathy, hypertrophic	14:23901923	160760	427C>T	NA	40	58	33	8	23	88		RYR2	Ventricular tachycardia, polymorphic	1.23754	180902	506G>A	NA	73	39	354	16	23	149
MYH7	Cardiomyopathy, dilated	14:23901926	160760	424T>C	NA	41.78	64.67	30.56	8	20.78	85.22		RYR2	Arrhythmogenic right ventricular dysplasia type 2	1.23754	180902	527G>A	NA	63	35	298	15	26	134
MYH7	Cardiomyopathy, hypertrophic	14:23901979	160760	371C>T	NA	41	60	29	9	20	87		RYR2	Ventricular tachycardia, polymorphic	1.23754	180902	556G>A	rs201211033	60	36	273	14	26	127
MYH7	Cardiomyopathy, hypertrophic	14:23902295	160760	343T>C	NA	42.15	66.54	30.08	8.23	20.08	84.31		RYR2	Catecholaminergic polymorphic ventricular tachycardia	1.23754	180902	567A>T	NA	59	36	278	14	27	127
MYH7	Cardiomyopathy, hypertrophic	14:2390234	160760	298G>A	NA	42	61	31	9	21	86		RYR2	Long QT syndrome	1.23755	180902	649A>G	rs200642525	96	90	160	16	19	64
MYH7	Cardiomyopathy, dilated	14:23902397	160760	241C>T	NA	42	61	31	9	21	86		RYR2	Catecholaminergic polymorphic ventricular tachycardia	1.23755	180902	688G>T	NA	110	112	215	18	25	79
MYH7	Cardiomyopathy, hypertrophic	14:23902767	160760	175G>A	NA	43.38	68.62	30	9.15	20	82.77		RYR2	Catecholaminergic polymorphic ventricular tachycardia	1.23759	180902	994C>T	NA	103	115	256	24	18	75
MYH7	Cardiomyopathy, hypertrophic	14:23902782	160760	160C>T	NA	42	68	30	7	21	82		RYR2	Catecholaminergic polymorphic ventricular tachycardia	1.2376	180902	1069G>A	NA	97	99	277	26	13	84
MYH7	Cardiomyopathy, hypertrophic	14:23902827	160760	115G>A	NA	43	68	29	9	20	84		RYR2	Long QT syndrome	1.23761	180902	1198G>C	NA	91	103	286	29	19	82
MYH7	Cardiomyopathy, hypertrophic	14:23902865	160760	77C>T	rs186964570	43	68	29	9	20	84		RYR2	Catecholaminergic polymorphic ventricular tachycardia	1.23761	180902	1217C>T	NA	89	105	287	29	19	81
MYH7	Cardiomyopathy, hypertrophic	14:23902905	160760	37G>A	NA	44.83	69.75	30.08	10.08	20	81.17		RYR2	Catecholaminergic polymorphic ventricular tachycardia	1.23761	180902	1237T>A	NA	75	87	277	43	19	91
MYH7	Cardiomyopathy, hypertrophic	14:23902931	160760	11C>T	NA	42	68	28	9	18	86		RYR2	Catecholaminergic polymorphic ventricular tachycardia	1.23778	180902	5428G>C	NA	73	94	157	19	27	84
NF2	Neurofibromatosis 2	22:30000009	607379	22delC	NA	40	61	52	17	31	184		RYR2	Altered channel function	1.23778	180902	5656G>A	rs3766871	76	97	131	19	31	92
NF2	Neurofibromatosis 2	22:3003819	607379	364-1G>T	NA	2	0	2	1	20	149		RYR2	Catecholaminergic polymorphic ventricular tachycardia	1.23779	180902	6134A>G	NA	71	93	130	17	33	90
NF2	Neurofibromatosis 2	22:3003819	607379	364-1G>A	NA	2	0	2	1	20	149		RYR2	Catecholaminergic polymorphic ventricular tachycardia	1.23779	180902	6337G>A	rs186906598	72	92	125	17	29	97
NF2	Neurofibromatosis 2	22:30038194	607379	367A>T	NA	18	78	305	43	33	74		RYR2	Sudden infant death syndrome	1.2378	180902	6800G>A	NA	38	76	124	19	21	68
NF2	Neurofibromatosis 2	22:30038224	607379	397T>C	NA	17	81	313	42	34	75		RYR2	Catecholaminergic polymorphic ventricular tachycardia	1.2378	180902	6886G>C	NA	29	75	155	17	28	53
NF2	Neurofibromatosis 2	22:30069372	607379	1237A>G	NA	141.67	190	186.67	51.67	19.67	108.33		RYR2	Ventricular tachycardia, polymorphic	1.2378	180902	6916G>A	NA	28	69	159	17	27	47
NF2	Neurofibromatosis 2	22:30069475	607379	1340G>C	NA	66	159	122	14	17	113		RYR2	Catecholaminergic polymorphic ventricular tachycardia	1.2378	180902	6919T>C	NA	22	57	176	19	27	54
NF2	Neurofibromatosis 2	22:30069475	607379	1340_1340+1insT	NA	66	159	122	14	17	113		RYR2	Sudden unexplained death	1.2378	180902	6961G>A	NA	14	59	232	32	35	75
NF2	Neurofibromatosis 2	22:30069476	607379	1340+1G>A	NA	61.33	150.5	114.83	12.83	14.83	107		RYR2	Ventricular tachycardia, polymorphic	1.2378	180902	6982C>T	rs121918603	8	56	265	41	39	105
NF2	Neurofibromatosis 2	22:30069476	607379	1340+1G>T	NA	61.33	150.5	114.83	12.83	14.83	107		RYR2	Ventricular tachycardia, polymorphic	1.2378	180902	6992T>C	NA	12	43	280	37	36	122
NF2	Neurofibromatosis 2	22:30069477	607379	1340+2T>G	NA	60	139	109	12	17	102		RYR2	Ventricular tachycardia, polymorphic	1.2378	180902	7076G>A	NA	8	37	276	39	35	127
NF2	Neurofibromatosis 2	22:30069477	607379	1340+2dupT	NA	60	139	109	12	17	102		RYR2	Arrhythmogenic right ventricular dysplasia type 2	1.2378	180902	7157A>T	rs121918601	8	37	283	39	36	128
NF2	Neurofibromatosis 2	22:30070823	607379	1341-2A>C	NA	32	68	39	1	16	64		RYR2	Ventricular tachycardia, polymorphic	1.2378	180902	7159G>C	NA	9	31	289	36	30	128
NF2	Neurofibromatosis 2	22:30070824	607379	1341-1G>A	NA	56.39	93.89	59.11	7.33	18.83	83		RYR2	Ventricular tachycardia, polymorphic	1.2378	180902	7159G>A	NA	9	31	289	36	30	128
NF2	Neurofibromatosis 2	22:30070841	607379	1357C>T	NA	62	95	60	12	23	110		RYR2	Ventricular tachycardia, polymorphic	1.2378	180902	7175A>G	NA	8	31	282	43	30	127
NF2	Neurofibromatosis 2	22:3007085	607379	1366C>T	NA	57.5	93.17	52.5	11.33	24.83	102.33		RYR2	Catecholaminergic polymorphic ventricular tachycardia	1.2378	180902	7181C>G	NA	7	31	279	45	28	142
NF2	Neurofibromatosis 2	22:30070859	607379	1375C>T	NA	56	87	51	10	25	102		RYR2	Ventricular tachycardia, polymorphic	1.2378	180902	7202G>A	NA	8	29	282	44	29	144
NF2	Neurofibromatosis 2	22:30070871	607379	1387G>T	rs74315503	47	85	43	8	24	96		RYR2	Ventricular tachycardia, polymorphic	1.2378	180902	7202G>T	NA	8	29	282	44	29	144
NF2	Neurofibromatosis 2	22:30070877	607379	1393G>T	NA	45	82	46	8	24	99		RYR2	Catecholaminergic polymorphic ventricular tachycardia	1.2378	180902	7205G>A	NA	8	25	272	44	28	148
NF2	Neurofibromatosis 2	22:3007088	607379	1396C>T	rs74315504	42	74	38	8	23	95.5		RYR2	Ventricular tachycardia, polymorphic	1.2378	180902	7207G>A	NA	8	20	286	46	25	150
NF2	Neurofibromatosis 2	22:30070892	607379	1408C>T	NA	42	74	38	8	23	95		RYR2	Catecholaminergic polymorphic ventricular tachycardia	1.2378	180902	7210C>A	NA	7	19	291	49	25	148
NF2	Neurofibromatosis 2	22:30070901	607379	1417delC	NA	42	74	38	8	23	95		RYR2	Catecholaminergic polymorphic ventricular tachycardia	1.23781	180902	7258A>T	NA	8	17	284	45	24	149
NF2	Neurofibromatosis 2	22:30070927	607379	1443C>G	NA	39	72	35	7	20	91		RYR2	Ventricular tachycardia, polymorphic	1.23781	180902	7422G>C	rs121918598	7	14	287	44	23	151
NF2	Neurofibromatosis 2	22:30070929	607379	1445delC	NA	38	66	34	7	20	90		RYR2	Catecholaminergic polymorphic ventricular tachycardia	1.23781	180902	7423G>T	NA	7	15	290	45	28	151
NF2	Neurofibromatosis 2	22:30070931	607379	1446+1G>A	NA	34	65	33	6	22	89		RYR2	Catecholaminergic polymorphic ventricular tachycardia	1.23781	180902	7447T>A	NA	7	15	287	43	28	151
NF2	Neurofibromatosis 2	22:30074313	607379	1574+1G>T	NA	57	181	224	56	17	114		RYR2	Catecholaminergic polymorphic ventricular tachycardia	1.23781	180902	7493C>T	NA	7	15	291	44	28	153
NF2	Neurofibromatosis 2	22:30074313	607379	1574+1G>C	NA	57	181	224	56	17	114		RYR2	Arrhythmogenic right ventricular dysplasia type 2	1.23781	180902	7511C>T	NA	7	16	285	43	27	155
NF2	Neurofibromatosis 2	22:30074313	607379	1574+1G>A	NA	57	181	224	56	17	114		RYR2	Catecholaminergic polymorphic ventricular tachycardia	1.23781	180902	7528A>G	NA	5	12	266	46	32	163
NF2	Neurofibromatosis 2	22:30074314	607379	1574+2T>C	NA	59	181	223	57	18	118		RYR2	Ventricular tachycardia, polymorphic	1.23795	180902	13528G>A	NA	78	15	164	28	19	59
NF2	Neurofibromatosis 2	22:30077421	607379	1575-7C>A	NA	63	180	233	63	18	118		RYR2	Catecholaminergic polymorphic ventricular tachycardia	1.23796	180902	13564-41A>G	rs114289907	86	18	158	23	19	65
NF2	Neurofibromatosis 2	22:30077425	607379	1575-3C>G	NA	69	190	255	67	19	126		RYR2	Catecholaminergic polymorphic ventricular tachycardia	1.23796	180902	13933T>A	NA	181	75	149	101	18	86
NF2	Neurofibromatosis 2	22:30077426	607379	1575-2A>G	NA	68	192	253	64	18	129		RYR2	Catecholaminergic polymorphic ventricular tachycardia	1.23796	180902	14009T>A	NA	13	123	298	277	43	111
NF2	Neurofibromatosis 2	22:30077432	607379	1579G>T	rs74315505	73	198	282	62	15	126		RYR2	Catecholaminergic polymorphic ventricular tachycardia	1.238	180902	14885A>G	NA	129	178	162	21	19	202
NF2	Neurofibromatosis 2	22:30077434	607379	1581delA	NA	79	204	288	60	18	132		SDHB	Paraganglioma	1.17349	185470	645delC	NA	66	38	144.5	96	18.5	54.5
NF2	Neurofibromatosis 2	22:30077437	607379	1584delC	NA	81	201	311	62	17	130		SDHB	Cowden-like syndrome	1.17355	185470	359A>G	NA	139	165	196	46	18	187
NF2	Neurofibromatosis 2	22:30077451	607379	1598A>C	NA	83	181	306	55	19	117		SDHB	Paraganglioma	1.17371	185470	158G>A	rs34916635	35	78	47	14	42	83
NF2	Neurofibromatosis 2	22:30077469	607379	1616T>A	NA	9	23	99	29	19	253		SDHB	Phaeochromocytoma	1.17371	185470	157G>A	NA	36	77	40	14	44	81
NF2	Neurofibromatosis 2	22:30077478	607379	1625T>A	NA	9	24	98	29	19	252		SDHB	Paraganglioma	1.1738	185470	70C>T	NA	19	107	138	154	38	102
NF2	Neurofibromatosis 2	22:30077493	607379	1640delA	NA	11	27	105	28	18	254		SDHB	Paraganglioma	1.1738	185470	49A>G	NA	18	118	177	159	40	114
NF2	Neurofibromatosis 2	22:30077499	607379	1646delT	NA	15	32	107	29	20	254		SDHB	Paraganglioma	1.1738	185470	49delA	NA	18	118	177	159	40	114
NF2	Neurofibromatosis 2	22:30077589	607379	1736A>T	NA	17	35	122	30	23	252		SDHC	Paraganglioma	1.16129	602413	43C>T	rs201286421	94	188	135	191	17	195
NF2	Neurofibromatosis 2	22:30077589	607379	1736A>G	NA	17	35	122	30	23	252		SDHD	Paraganglioma	11.112	602690	224delT	NA	27	111	58	51	18	85
PCSK9	Hypercholesterolaemia, autosomal dominant	1:5550518	607786	NA	NA	6	69	101	28	28	73		SDHD	Paraganglioma	11.112	602690	277delT	NA	83	168	262	50	19	154
PCSK9	High LDL cholesterol	1:5550552	607786	10G>A	rs186669805	7	69	95	26	27	75		SDHD	Phaeochromocytoma	11.112	602690	296delT	NA	101	158	294	52	18	151
PCSK9	Hypocholesterolaemia	1:55509649	607786	341T>C	NA	40	105	164	43	19	56		SDHD	Paraganglioma	11.112	602690	302T>C	NA	102	164	302	53	17	156
PCSK9	Hypercholesterolaemia, autosomal dominant	1:55509689	607786	381T>A	rs28942111	37	114.5	166.5	44.5	19	59		SDHD	Paraganglioma	11.112	602690	304C>T	NA	110	165	305	54	19	158
PCSK9	Hypercholesterolaemia	1:55509693	607786	385G>A	NA	37	115	165	45	19	59		SDHD	Paraganglioma	11.112	602690	305A>T	rs104894302	113	171	315	59	18	155
PCSK9	Hypercholesterolaemia	1:55523127	607786	1120G>C	NA	52	124	275	61	19	80		SDHD	Paraganglioma	11.112	602690	305A>C	NA	113	171	315	59	18	155
PCSK9	Hypercholesterolaemia, autosomal dominant	1:55523127	607786	1120G>T	rs137852912	52	124	275	61	19	80		SDHD	Paraganglioma	11.112	602690	305A>G	NA	113	171	315	59	18	155
PCSK9	Hypocholesterolaemia	1:55525219	607786	1564G>A	NA	89	88	316	25	18	142		STK11	Peutz-Jeghers syndrome	19.1219	602216	427delG	NA	17	97	332	36	33	107
PCSK9	Low LDL cholesterol, association with	1:55525315	607786	1660C>G	rs149311926	70	83	335	15	26	147		STK11	Peutz-Jeghers syndrome	19.122	602216	580G>A	rs121913315	149	107	201	89	19	149
PCSK9	Hypocholesterolaemia	1:55527213	607786	1847C>T	NA	70	83	335	15	26	147		STK11	Peutz-Jeghers syndrome	19.1221	602216	767A>C	NA	112	219	66	108	19	271
PCSK9	Hypercholesterolaemia	1:55527216	607786	1850C>A	NA	73.67	78	341.33	14.67	22.67	144		TGFBR1	Marfan syndrome II	9.1019	190181	759G>A	NA	27	122	316	143	16	99
PCSK9	High LDL cholesterol	1:55527235	607786	1863+6G>A	NA	74	79	354	14	26	137		TGFBR1	Loeys-Dietz syndrome	9.1019	190181	796G>T	NA	27	123	314	141	15	100
PCSK9	High LDL cholesterol	1:55529048	607786	1870G>A	NA	75	76	349	15	25	138		TGFBR1	Marfan syndrome II	9.1019	190181	799A>C	NA	28	132	319	153	16	107
PCSK9	Low LDL cholesterol	1:55529182	607786	2004C>A	NA	72	76	348	15	25	140		TGFBR1	Multiple self-healing squamous epithelioma	9.1019	190181	806-2A>C	NA	30	135	333	150	15	109
PCSK9	Atherosclerosis, severity, association with	1:55529187	607786	2009A>G	rs505151	66	70	355	12	24	141		TGFBR1	Marfan syndrome II	9.1019	190181	934G>A	NA	30	134	337	156	17	110
PCSK9	Low LDL cholesterol, association with	1:55529215	607786	2037C>A	rs28362286	66	69	365	11	24	141		TGFBR1	Aortic aneurysm, thoracic	9.1019	190181	944A>G	NA	32	135	360	155	18	111
PMS2	Azoospermia/oligozoospermia, association with	7:601734	600259	2324G>A	rs17420802	71	164	387	20	19	171		TGFBR1	Loeys-Dietz aortic aneurysm syndrome	9.1019	190181	953T>G	rs121918710	35.57	141.71	378.71	162.14	16.86	117.71
PMS2	Colorectal cancer, non-polyposis	7:6018253	600259	2249G>A	NA	74	169	399	24	18	188		TGFBR1	Multiple self-healing squamous epithelioma	9.10191	190181	980delC	NA	37.71	152.06	379.24	162.35	17.71	123.76
PMS2	Colorectal cancer, non-polyposis	7:6029554	600259	1021delA	rs63750049	17	40	135	60	29	104		TGFBR1	Marfan syndrome II	9.10191	190181	1003A>C	NA	38.1	154.4	379.6	161.9	17.8	125
PMS2	Turcot syndrome	7:6029587	600259	989-1G>T	NA	16	40	135	55	31	108		TGFBR1	Loeys-Dietz aortic aneurysm syndrome	9.10191	190181	1049C>A	NA	37	157	378	162	18	124
PMS2	Colorectal cancer, non-polyposis	7:6031643	600259	949C>T	rs143277125	16	41	132	53	28	108		TGFBR1	Loeys-Dietz syndrome, type I	9.10191	190181	1052A>G	NA	37	157	372	160	18	123
PMS2	Colorectal cancer, non-polyposis	7:6031649	600259	943C>T	rs200640585	17	43	136	58	31	118		TNNI3	Cardiomyopathy, hypertrophic	19.5566	191044	610C>T	NA	0	0	2	0	36	46
PMS2	Colorectal cancer, non-polyposis	7:6035165	600259	903G>T	rs267608153	18	43.5	138	64.5	33	125.5		TNNI3	Cardiomyopathy, dilated	19.5567	191044	544G>A	NA	143	176	306	72	18	230
PMS2	Colorectal cancer, non-polyposis	7:6038824	600259	620G>A	NA	39	88	188	68	15	141		TNNI3	Cardiomyopathy, hypertrophic	19.5567	191044	521A>T	NA	130	160	312	73	19	224
PMS2	Colorectal cancer, non-polyposis	7:603883	600259	614A>C	NA	39	93	226	64	16	118		TNNI3	Cardiomyopathy, restrictive	19.5567	191044	511G>A	rs121917761	130	160	312	73	19	224
PMS2	Colorectal cancer, non-polyposis	7:6038901	600259	543delT	rs63751029	41	94	225	65	17	112		TNNI3	Cardiomyopathy, hypertrophic	19.5567	191044	509G>A	NA	125	158	302	72	18	225
PMS2	Colorectal cancer, non-polyposis	7:6042083	600259	537+1G>T	NA	40	93	202	63	17	103		TNNI3	Cardiomyopathy, restrictive	19.5567	191044	502delG	NA	119	159	274	74	15	207
PMS2	Colorectal cancer, non-polyposis	7:6045521	600259	163+2T>C	NA	219	437	259	138	19	365		TNNI3	Cardiomyopathy, hypertrophic	19.5567	191044	500T>C	NA	120	157	299	73	17	221
PTEN	Cowden disease	10:89623296	601728	NA	NA	166	329	253	114	19	247		TNNI3	Cardiomyopathy, hypertrophic	19.5567	191044	497C>T	NA	118	159	311	70	18	223
PTEN	Cowden disease	10:89653817	601728	115G>C	NA	19	120	80	107	32	126		TNNT2	Cardiomyopathy, dilated	1.20133	191045	614G>T	rs121964860	99	158	181	53	17	151
PTEN	Cowden disease	10:89685319	601728	209+5G>A	NA	19	157	128	88	37	103		TP53	Li-Fraumeni syndrome	17.758	191170	97-11C>G	NA	19	123	57	74	34	129
PTEN	Cowden disease	10:89692886	601728	370T>C	rs121909223	34	38	44	0	22	38		TP53	Breast cancer ?	17.758	191170	97-28T>A	rs200989844	18	124	62	81	31	125
PTEN	Cowden disease	10:89692886	601728	370delT	NA	34	38	44	0	22	38		TP53	Gastric cancer	17.758	191170	91G>A	NA	19.22	128.56	71	83.61	30.39	126
PTEN	Cowden disease	10:89692887	601728	371G>C	NA	36.62	67.5	50.38	0	32.12	59.88		TP53	Myelodysplastic/myeloproliferative disease	17.758	191170	31G>C	NA	17	128	65	86	31	124
PTEN	Cowden disease	10:89692887	601728	371G>A	NA	36.62	67.5	50.38	0	32.12	59.88		TSC1	Tuberous sclerosis	9.13578	605284	2285A>G	rs118203670	0	4	24	4	32	65
PTEN	Cowden disease	10:89692888	601728	372T>G	NA	0	1	2	0	31	2		TSC1	Tuberous sclerosis	9.13578	605284	2281_2284dupTACA	NA	0	4	24	4	32	65
PTEN	Cowden disease	10:89692892	601728	376G>C	NA	41	3	10	2	33	310		TSC1	Tuberous sclerosis	9.13578	605284	1998-1G>A	rs118203614	15	136	220	88	35	125
PTEN	Cowden disease	10:89692895	601728	379G>A	NA	34	8	21	10	21	266		TSC1	Tuberous sclerosis	9.13578	605284	1998-2A>T	NA	19	177	277	99	27	156
PTEN	Bannayan-Riley-Ruvalcaba syndrome	10:89692919	601728	403A>G	NA	43	72	249	41	19	89		TSC1	Tuberous sclerosis	9.13578	605284	1997+1G>A	rs118203610	19	180	290	98	26	159
PTEN	Autism spectrum disorders, developmental delay and macrocephaly	10:89692986	601728	470A>G	NA	25	118	87	18	29	126		TSC1	Tuberous sclerosis	9.13578	605284	1841delA	rs118203589	43	57	358	57	19	54
PTEN	Multiple cancers	10:89692988	601728	472G>A	NA	24	108	69	17	33	125		TSC1	Tuberous sclerosis	9.13578	605284	1825G>T	rs118203587	47	58	366	56	19	60
PTEN	Cowden disease	10:89692991	601728	475A>G	NA	22	103	69	15	30	113		TSC1	Tuberous sclerosis	9.13578	605284	1697delC	rs118203563	76	66	539	61	18	74
PTEN	Cowden disease	10:89692992	601728	476G>C	NA	20	93	63	15	25	103		TSC1	Tuberous sclerosis	9.13578	605284	1687delG	rs118203561	78	59	541	59	19	76
PTEN	Breast cancer	10:89692998	601728	482G>A	NA	19	87	52	12	22	100		TSC1	Tuberous sclerosis	9.13579	605284	1030-1G>A	rs118203489	85	58	385	18	33	96
PTEN	Cowden disease	10:89693002	601728	486C>G	NA	20	80	49	12	17	91		TSC1	Tuberous sclerosis	9.13579	605284	1030-3C>G	rs118203488	86	56	426	17	31	104
PTEN	Cowden disease	10:89693007	601728	491delA	NA	0	0	2	0	44	16		TSC1	Tuberous sclerosis	9.13579	605284	825T>G	rs118203454	22	28	208	18	25	97
PTEN	Cowden disease	10:89711968	601728	586_587insT	NA	45.67	309.33	173	87	18	172.33		TSC1	Tuberous sclerosis	9.13579	605284	814G>T	NA	23.33	28	203.33	18.67	24.33	99
PTEN	Bannayan-Zonana syndrome	10:89711968	601728	586delC	NA	45.67	309.33	173	87	18	172.33		TSC1	Tuberous sclerosis	9.13579	605284	813T>A	rs118203452	24	28	201	19	24	98
PTEN	Cowden disease	10:89711971	601728	589A>T	NA	45	311	173	90	18	172		TSC1	Tuberous sclerosis	9.13579	605284	772G>T	rs118203450	23	26	178	18	24	92
PTEN	Cowden disease	10:89711974	601728	592delA	NA	44	316	177	91	18	172		TSC1	Tuberous sclerosis	9.13579	605284	749T>A	rs118203447	22	26	183	18	23	94
PTEN	Cowden / Bannayan-Riley-Ruvalcaba syndromes	10:89711981	601728	599T>C	NA	52	331	173	96	18	179		TSC1	Tuberous sclerosis	9.13579	605284	749T>G	rs118203447	22	26	183	18	23	94
PTEN	Breast cancer	10:89712003	601728	621T>G	NA	63	349	196	94	18	189		TSC1	Tuberous sclerosis	9.13579	605284	749delT	rs118203445	22	26	183	18	23	94
PTEN	Proteus syndrome	10:89712015	601728	633C>A	rs121909232	61	359	204	96	17	185		TSC1	Tuberous sclerosis	9.13579	605284	745delA	rs118203444	101	95	301	11	33	108
PTEN	Cowden disease	10:89712017	601728	634+1G>T	NA	61	320	219	89	16	164		TSC1	Tuberous sclerosis	9.13579	605284	745A>T	rs118203443	101	95	301	11	33	108
PTEN	Cowden disease	10:89712018	601728	634+2T>C	NA	65	328	207	84	16	164		TSC1	Tuberous sclerosis	9.1358	605284	737+1delG	NA	100	100	302	11	32	107
PTEN	Bannayan-Riley-Ruvalcaba syndrome	10:89712021	601728	634+5G>T	NA	66	338	233	90	16	166		TSC1	Tuberous sclerosis	9.1358	605284	737+1G>A	rs118203438	100	100	302	11	32	107
PTEN	Bannayan-Riley-Ruvalcaba syndrome	10:89712021	601728	634+5G>A	rs138336847	66	338	233	90	16	166		TSC1	Tuberous sclerosis	9.1358	605284	737G>C	rs118203436	107	93	310	12	32	112
PTEN	Autism spectrum disorders, developmental delay and macrocephaly	10:89717607	601728	635-3C>G	NA	68	336	232	96	17	167		TSC1	Tuberous sclerosis	9.1358	605284	737G>A	rs118203436	107	93	310	12	32	112
PTEN	Cowden disease	10:89717609	601728	635-1G>C	NA	66	334	236	96	17	167		TSC1	Tuberous sclerosis	9.1358	605284	733C>T	rs118203434	101	96	309	13	34	109
PTEN	Developmental delay and macrocephaly	10:89717609	601728	635-1G>A	NA	66	334	236	96	17	167		TSC1	Tuberous sclerosis	9.1358	605284	732delT	rs118203433	100	95	299	13	33	106
PTEN	Bannayan-Zonana syndrome	10:89717615	601728	640C>T	rs121909227	67	335	240	97	19	168		TSC1	Tuberous sclerosis	9.1358	605284	712A>T	NA	83	100	259	12	26	112
PTEN	Cowden disease	10:89717625	601728	650T>A	NA	66	330	234	100	19	169		TSC1	Tuberous sclerosis	9.1358	605284	694G>T	rs118203429	68	100	222	13	24	111
PTEN	Cowden disease	10:89717629	601728	654C>A	NA	67	330	249	98	17	171		TSC1	Tuberous sclerosis	9.1358	605284	682C>T	rs118203427	69	98	203	14	26	111
PTEN	Cowden disease	10:8971763	601728	655C>T	NA	63	325	252	105	17	180		TSC1	Tuberous sclerosis	9.1358	605284	671T>G	rs118203426	61.31	104.46	160.08	11.15	25.08	106.85
RB1	Retinoblastoma	13:48934164	614041	619C>T	NA	104	222	388	96	19	133		TSC1	Tuberous sclerosis	9.1358	605284	663+1G>A	rs118203419	60	105	150	11	24	108
RB1	Retinoblastoma	13:48939076	614041	908T>A	NA	55	132	379	35	19	106		TSC1	Tuberous sclerosis	9.1358	605284	647T>C	rs118203416	58	112	150	10	27	101
RB1	Retinoblastoma	13:48939096	614041	928G>T	NA	57	131	353	37	17	107		TSC1	Tuberous sclerosis	9.1358	605284	363+1G>T	rs118203372	38	140	390	26	18	178
RB1	Retinoblastoma	13:48939097	614041	929G>A	rs200844292	57	129	359	40	18	104		TSC1	Tuberous sclerosis	9.1358	605284	362A>G	rs118203369	38	143	412	26	19	181
RB1	Retinoblastoma	13:48939097	614041	929delG	NA	57	129	359	40	18	104		TSC1	Tuberous sclerosis	9.1358	605284	350T>C	rs118203368	41	145	410	26	17	179
RB1	Retinoblastoma	13:48939099	614041	931delC	NA	56	128	350	41	19	103		TSC1	Tuberous sclerosis	9.1358	605284	325C>T	NA	47	153	448	28	19	198
RET	Hirschsprung disease	10:43606791	164761	1400T>C	NA	18	93	277	91	46	70		TSC1	Tuberous sclerosis	9.1358	605284	148delC	rs118203340	100	156	346	12	33	168
RET	Aganglionosis, total colonic	10:43606796	164761	1405G>A	NA	18	99	300	92	44	70		TSC1	Tuberous sclerosis	9.1358	605284	146delA	NA	100	154	346	12	32	168
RET	Thyroid carcinoma, medullary	10:43615641	164761	2720A>T	NA	57	214	376	96	18	168		TSC1	Tuberous sclerosis	9.1358	605284	107-2A>G	rs118203332	97	144	327	12	32	158
RET	Hirschsprung disease	10:43615641	164761	2720A>C	NA	57	214	376	96	18	168		TSC2	Tuberous sclerosis	16.2107	191092	775-1G>A	rs45454192	118	117	243	67	16	144
RET	Hirschsprung disease	10:43617398	164761	2735G>A	NA	53	201	357	97	18	160		TSC2	Tuberous sclerosis	16.2107	191092	782G>C	rs45502703	110	114	231	67	15	139
RET	Thyroid cancer	10:43617398	164761	2735G>C	rs78347871	53	201	357	97	18	160		TSC2	Tuberous sclerosis	16.2107	191092	791T>C	rs45517131	109	103	236	48	18	118
RET	Thyroid carcinoma, medullary	10:43617415	164761	2752A>G	NA	57	196	380	96	19	158		TSC2	Tuberous sclerosis	16.2109	191092	925delC	rs137854138	5	2	6	0	26	17
RET	Multiple endocrine neoplasia 2B	10:43617416	164761	2753T>C	rs74799832	57	196	380	96	19	158		TSC2	Tuberous sclerosis	16.2109	191092	926delT	NA	4	2	6	0	24	17
RET	Hirschsprung disease	10:43617424	164761	2761G>A	NA	55	195	368	94	18	152		TSC2	Tuberous sclerosis	16.2109	191092	972C>A	rs45517143	26	12	33	0	28	67
RET	Hirschsprung disease	10:43617424	164761	2761G>T	NA	55	195	368	94	18	152		TSC2	Tuberous sclerosis	16.2109	191092	972C>G	rs45517143	26	12	33	0	28	67
RET	Thyroid cancer	10:43617427	164761	2764T>C	NA	52	189	365.5	98.5	19	143		TSC2	Tuberous sclerosis	16.2109	191092	975+1G>T	NA	27	12	30	0	17	54
RET	Hirschsprung disease	10:43619142	164761	2825G>A	NA	50	183	366	98	16	132		TSC2	Lymphangiokiomyomatosis	16.2109	191092	975+1delG	NA	27	12	30	0	17	54
RET	Aganglionosis, total colonic	10:43619143	164761	2826G>C	NA	50	182	357	96	18	133		TSC2	Tuberous sclerosis	16.2111	191092	976-15G>A	rs45517150	33	14	35	0	13	52
RYR1	Myopathy, congenital	19:38931458	180901	119G>T	NA	118	210	293	113	19	165		TSC2	Tuberous sclerosis	16.2111	191092	976-3C>G	rs45517151	31	13	30	0	13	48
RYR1	Myopathy, congenital	19:38931461	180901	122T>C	NA	119	221	310	118	18	166		TSC2	Tuberous sclerosis	16.2111	191092	976-1G>A	rs45451199	43	21	22	0	14	46
RYR1	Malignant hyperthermia	19:38931469	180901	130C>T	rs193922748	125	218	331	122	17	178		TSC2	Tuberous sclerosis	16.2111	191092	976-1G>T	rs45451199	43	21	22	0	14	46
RYR1	Malignant hyperthermia	19:3893147	180901	131G>A	rs139161723	136	222	342	124	18	185		TSC2	Tuberous sclerosis	16.2111	191092	982G>C	rs45517152	47	23	28	0	13	50
RYR1	Malignant hyperthermia	19:38931491	180901	152C>A	rs193922749	141	254	367.33	133	16	204.67		TSC2	Tuberous sclerosis	16.2111	191092	993C>A	rs45517153	45	23	25	1	8	38
RYR1	Central core disease	19:38933001	180901	178G>A	rs118192160	142	256	366	135	16	209		TSC2	Tuberous sclerosis	16.2111	191092	1001T>G	rs45484892	50	28.7	28.6	1	10.6	37.3
RYR1	Malignant hyperthermia	19:38933013	180901	190T>C	NA	144	258	351	136	12	212		TSC2	Tuberous sclerosis	16.2111	191092	1001T>C	NA	50	28.7	28.6	1	10.6	37.3
RYR1	Malignant hyperthermia	19:38933035	180901	212C>A	rs118192113	144	266	351	137	13	208		TSC2	Tuberous sclerosis	16.2111	191092	1009G>A	rs45517145	62	34.12	28.62	1	15.88	50.25
RYR1	Multi-minicore disease	19:38934252	180901	325C>T	rs118192173	141	263	348	133	15	206		TSC2	Tuberous sclerosis	16.2111	191092	1019T>C	NA	78	60	115	1	18	53
RYR1	Myopathy, congenital	19:38934263	180901	336C>G	NA	148	266	358	131	18	210		TSC2	Tuberous sclerosis	16.2111	191092	1034T>G	rs45451295	86	60	200	1	18	54
RYR1	Central core disease	19:38934843	180901	479A>G	rs193922752	151	264	324	120	18	215		TSC2	Tuberous sclerosis	16.2111	191092	1042A>T	rs45517146	83	57	231	1	22	49
RYR1	Central core disease	19:38934851	180901	487C>T	rs118192161	151	264	327	120	19	209		TSC2	Tuberous sclerosis	16.2111	191092	1060C>T	rs45469896	85	54	248	1	26	50
RYR1	Malignant hyperthermia	19:38939431	180901	1100G>T	rs113332073	19	82	151	27	38	57		TSC2	Tuberous sclerosis	16.2111	191092	1082T>C	rs45517147	80	55	247	1	26	50
RYR1	Malignant hyperthermia	19:38939431	180901	1100G>A	rs113332073	19	82	151	27	38	57		TSC2	Tuberous sclerosis	16.2111	191092	1094_1095delTC	rs137854423	84	56	239	1	26	48
RYR1	Malignant hyperthermia	19:38942425	180901	1144C>A	NA	18	83	162	27	39	60		TSC2	Tuberous sclerosis	16.2111	191092	1096G>T	rs45517148	77	52	274	2	25	41
RYR1	Malignant hyperthermia	19:38942482	180901	1201C>T	rs193922764	18	92	180	27	38	64		TSC2	Tuberous sclerosis	16.2111	191092	1100G>A	rs1800725	75	51	266	2	25	41
RYR1	Malignant hyperthermia	19:38942482	180901	1201C>A	NA	18	92	180	27	38	64		TSC2	Tuberous sclerosis	16.2111	191092	1108C>T	NA	75	51	266	2	25	41
RYR1	Malignant hyperthermia	19:38942482	180901	1201C>G	rs193922764	18	92	180	27	38	64		TSC2	Tuberous sclerosis	16.2111	191092	1117C>T	rs45458694	72	43	259	2	20	46
RYR1	Malignant hyperthermia	19:38948186	180901	1841G>T	rs193922772	5	16	49	75	17	21		TSC2	Tuberous sclerosis	16.2111	191092	1118A>C	NA	64	45	250	2	27	45
RYR1	Myopathy, congenital	19:38948696	180901	1931G>T	NA	13	28	81	108	25	38		TSC2	Tuberous sclerosis	16.2112	191092	1257+1G>A	NA	192	99	217	76	19	118
RYR1	Myopathy, congenital	19:38948748	180901	1983G>A	NA	13	31	94	116	25	39		TSC2	Tuberous sclerosis	16.2112	191092	1258-3C>G	rs45517161	185	90	210	78	18	114
RYR1	Myopathy, congenital	19:38948878	180901	2113G>C	NA	18	52	98	131	26	49		TSC2	Tuberous sclerosis	16.2116	191092	1661C>A	rs45471596	148	95	233	83	19	382
RYR1	Malignant hyperthermia	19:38976478	180901	5183C>T	rs193922781	111	232	365	38	16	132		TSC2	Tuberous sclerosis	16.2116	191092	1678G>A	rs141631268	146	94	235	90	19	388
RYR1	Malignant hyperthermia	19:38976481	180901	5186T>G	rs193922782	97	222	340	33	19	130		TSC2	Tuberous sclerosis	16.2116	191092	1693delC	rs137854087	144	97	219	88	16	383
RYR1	Myopathy, congenital	19:38976805	180901	5510A>C	NA	0	0	0	0	34	34		TSC2	Tuberous sclerosis	16.2116	191092	1714C>T	NA	137	94	208	75	19	364
RYR1	Myopathy, congenital	19:38980018	180901	5749G>T	NA	15	199	168	183	34	152		TSC2	Tuberous sclerosis	16.212	191092	1754G>A	NA	50	46	157	52	18	177
RYR1	Multi-minicore disease	19:3898077	180901	5869T>A	rs192932788	16	199	171	178	36	154		TSC2	Tuberous sclerosis	16.2121	191092	1783C>T	rs45517199	39	45	177	49	17	138
RYR1	Myopathy, congenital	19:38980809	180901	5908C>T	NA	16	199	169	181	38	152		TSC2	Tuberous sclerosis	16.2121	191092	1790A>G	rs137854322	23	31	119	39	14	106
RYR1	Myopathy, congenital with cores	19:38980839	180901	5938delC	NA	13	192.67	190.33	165.33	39	153.67		TSC2	Tuberous sclerosis	16.2123	191092	2221-2A>G	rs45502196	194	139	313	33	18	135
RYR1	Malignant hyperthermia	19:38981282	180901	6037A>C	NA	13	191	193	163	38	155		TSC2	Tuberous sclerosis	16.2123	191092	2221-2A>C	rs45502196	194	139	313	33	18	135
RYR1	Fibre type disproportion, congenital	19:38981349	180901	6104A>T	NA	13	193	192	161	36	155		TSC2	Tuberous sclerosis	16.2123	191092	2221-1G>C	rs45517218	194	139	318	36	17	136
RYR1	Malignant hyperthermia	19:38985021	180901	6304G>C	NA	11	189	194	163	37	153		TSC2	Tuberous sclerosis	16.2123	191092	2225C>G	rs45517220	197	145	317	37	19	142
RYR1	Malignant hyperthermia	19:38985066	180901	6349G>C	rs193922788	12	183	201	174	36	148		TSC2	Tuberous sclerosis	16.2123	191092	2251C>T	rs45517222	206	156	328	43	17	153
RYR1	Malignant hyperthermia	19:38985104	180901	6387C>G	rs117886618	13	182	193	166	37	147		TSC2	Tuberous sclerosis	16.2123	191092	2261delC	NA	196	158	335	43	19	153
RYR1	Malignant hyperthermia	19:38985105	180901	6388G>A	rs193922789	13	172	192	162	35	146		TSC2	Tuberous sclerosis	16.2123	191092	2306T>A	rs45499191	210	161	367	47	19	154
RYR1	Malignant hyperthermia & exertional rhabdomyolosis	19:38985195	180901	6478G>A	rs143398211	14	174	194	160	33	147		TSC2	Tuberous sclerosis	16.2123	191092	2328C>A	rs45517225	211	160	364	47	19	150
RYR1	Malignant hyperthermia	19:38985204	180901	6487C>T	rs118192175	14	171	191	162.33	31	144.67		TSC2	Tuberous sclerosis	16.2123	191092	2347delA	rs137854385	207	162	368	52	18	155
RYR1	Malignant hyperthermia	19:38985205	180901	6488G>A	rs118192163	14	171	192	163	30	144		TSC2	Tuberous sclerosis	16.2123	191092	2353C>T	rs45517226	201	163	371	54	18	154
RYR1	Malignant hyperthermia	19:38985205	180901	6488G>C	rs118192163	14	171	192	163	30	144		TSC2	Tuberous sclerosis	16.2126	191092	2747T>G	rs137854405	267	312	304	60	19	292
RYR1	Malignant hyperthermia	19:38987541	180901	6838G>A	rs193922797	37	160	132	132	13	97		TSC2	Tuberous sclerosis	16.2127	191092	2753C>G	NA	278	312	313	59	19	299
RYR1	Multi-minicore disease	19:3898755	180901	6847A>C	rs118192121	42	166	138	133	14	97		TSC2	Tuberous sclerosis	16.2127	191092	2785G>T	rs45517268	295	311	322	61	15	295
RYR1	Malignant hyperthermia	19:38989817	180901	6961A>G	rs34390345	42	175	147	133	16	99		TSC2	Tuberous sclerosis	16.2127	191092	2785delG	rs137854098	295	311	322	61	15	295
RYR1	Myopathy, congenital	19:38989862	180901	7006C>T	NA	49	165	143	137	13	96		TSC2	Tuberous sclerosis	16.2127	191092	2824G>T	rs45517270	313	299	344	56	19	277
RYR1	Malignant hyperthermia	19:38989863	180901	7007G>A	rs112563513	60	162	152	126	10	104		TSC2	Tuberous sclerosis	16.2127	191092	2837+1G>T	rs45517271	307	292	324	52	17	274
RYR1	Malignant hyperthermia	19:3899031	180901	7063C>T	rs193922803	70	141	196	49	19	93		TSC2	Tuberous sclerosis	16.2129	191092	3099C>A	rs45464800	20	56	201	86	19	100
RYR1	Malignant hyperthermia	19:38990322	180901	7075C>T	NA	72	142	199	51	17	91		TSC2	Tuberous sclerosis	16.2129	191092	3099delC	rs137854157	20	56	201	86	19	100
RYR1	Malignant hyperthermia	19:38990332	180901	7085A>G	rs193922804	52	147	287	66	15	88		TSC2	Tuberous sclerosis	16.2129	191092	3106T>C	rs45517281	17	44	188	76	21	80
RYR1	Malignant hyperthermia	19:38990337	180901	7090T>G	rs193922805	48	149	327	66	19	91		TSC2	Tuberous sclerosis	16.2129	191092	3178T>C	rs45517285	89	151	209	23	19	134
RYR1	Malignant hyperthermia	19:38990344	180901	7097C>G	rs193922806	45	157	354	71	17	95		TSC2	Tuberous sclerosis	16.2129	191092	3182T>C	NA	90	137	240	22	19	131
RYR1	Malignant hyperthermia	19:38990346	180901	7099G>A	rs146306934	46	155	406	80	19	106		TSC2	Tuberous sclerosis	16.2129	191092	3236C>A	NA	75	147	282	27	19	123
RYR1	Central core disease	19:38990637	180901	7304G>T	rs28933396	74	233	341	119	19	152		TSC2	Tuberous sclerosis	16.2129	191092	3265C>T	rs45517288	62	136	275	26	18	118
RYR1	Central core disease	19:38990637	180901	7304G>A	rs28933396	74	233	341	119	19	152		TSC2	Tuberous sclerosis	16.213	191092	3422C>T	rs34870424	78	33	224	205	13	72
RYR1	Malignant hyperthermia	19:3899128	180901	7358T>C	rs118192123	43	103	387	37	14	65		TSC2	Tuberous sclerosis	16.213	191092	3430G>A	rs45517294	93	45	229	210	11	73
RYR1	Malignant hyperthermia	19:38991282	180901	7360C>T	rs193922816	44	104	375	37	14	63		TSC2	Tuberous sclerosis	16.213	191092	3442C>T	rs45477491	92	45	222	209	11	78
RYR1	Malignant hyperthermia	19:38991283	180901	7361G>A	rs118192122	49	97	449	39	19	58		TSC2	Tuberous sclerosis	16.213	191092	3476G>T	rs45473098	95	48	229	215	12	79
RYR1	Muscular dystrophy and arthrogryposis	19:38996955	180901	8554C>T	NA	54	270	267	35	19	179		TSC2	Tuberous sclerosis	16.213	191092	3491C>T	rs45448801	96	48	226	217	12	80
RYR1	Myopathy, congenital	19:38997317	180901	8692+131G>A	NA	12	155	147	26	27	153		TSC2	Tuberous sclerosis	16.213	191092	3509C>A	rs45517296	95	48	225	214	13	80
RYR1	Myopathy, congenital	19:38997592	180901	8816G>A	rs118192125	9	186	222	41	24	177		TSC2	Tuberous sclerosis	16.213	191092	3520delC	rs137854326	97	50	226	219	16	79
RYR1	Fibre type disproportion, congenital	19:39001206	180901	9000+1G>T	NA	9	189	327	49	25	162		TSC2	Tuberous sclerosis	16.213	191092	3532C>T	rs45517297	98	53	222	208	16	80
RYR1	Myopathy, congenital	19:39001361	180901	9062C>T	NA	9	183	353	53	27	134		TSC2	Tuberous sclerosis	16.213	191092	3535G>T	rs45483391	102	55	223	209	16	79
RYR1	Myopathy, congenital	19:39002251	180901	9172+1G>A	NA	9	186	354	52	29	135		TSC2	Tuberous sclerosis	16.213	191092	3559delG	rs137854163	104.67	56.33	204.67	206.67	16.33	81.67
RYR1	Myopathy, congenital	19:39002893	180901	9242T>C	rs147012990	11	178	349	49	22	125		TSC2	Tuberous sclerosis	16.213	191092	3574C>T	rs45517298	167	147	137	58	17	210
RYR1	Malignant hyperthermia	19:39002961	180901	9310G>A	rs193922832	10	176	340	49	21	118		TSC2	Tuberous sclerosis	16.213	191092	3574delC	rs137854014	167	147	137	58	17	210
RYR1	Myopathy, congenital	19:39006777	180901	9605C>T	NA	19	99	152	74	29	73		TSC2	Tuberous sclerosis	16.213	191092	3596T>G	NA	162	145	142	55	17	204
RYR1	Fibre type disproportion, congenital	19:39010039	180901	10204T>G	rs145944224	89	205	344	112	18	137		TSC2	Tuberous sclerosis	16.213	191092	3598C>T	rs45438205	154	153	160	62	18	202
RYR1	Myopathy, congenital	19:39016077	180901	10561G>T	NA	18	76	348	69	21	81		TSC2	Tuberous sclerosis	16.213	191092	3605C>G	NA	147	142	144	62	15	202
RYR1	Multi-minicore disease	19:39016095	180901	10579C>T	rs118192164	9	45	193	79	24	54		TSC2	Tuberous sclerosis	16.213	191092	3605C>A	NA	147	142	144	62	15	202
RYR1	Central core disease	19:39016132	180901	10616G>A	rs143987857	7	20	137	49	21	44		TSC2	Tuberous sclerosis	16.213	191092	3610G>A	rs45517302	161	155	161	70	16	205
RYR1	Axial myopathy, late-onset	19:39016137	180901	10621G>A	NA	7	21	131	49	23	43		TSC2	Tuberous sclerosis	16.213	191092	3610+1G>A	rs45517299	145	142	159	70	16	196
RYR1	Central core disease	19:39018417	180901	10817T>C	rs118192127	7.09	66.09	295.91	37.64	30.36	79.91		TSC2	Tuberous sclerosis	16.2132	191092	3611G>A	rs45462194	160	161	163	80	17	206
RYR1	Malignant hyperthermia	19:39019676	180901	11120G>T	rs193922838	7	68	300	38	28	83		TSC2	Tuberous sclerosis	16.2132	191092	3662C>A	rs45517305	159	161	148	86	15	204
RYR1	Malignant hyperthermia	19:39019682	180901	11126C>T	NA	8	83	328	48	30	95		TSC2	Tuberous sclerosis	16.2132	191092	3685C>T	rs45517306	136.5	160	149.5	86.5	14.5	196.5
RYR1	Myopathy, congenital	19:39070694	180901	14437C>T	NA	150	314	274	29	19	219		TSC2	Tuberous sclerosis	16.2132	191092	3695delC	rs137854316	125	157	139	86	15	183
RYR1	Central core disease	19:39070697	180901	14440C>T	rs118192142	147	301	266	29	19	212		TSC2	Tuberous sclerosis	16.2134	191092	3999delC	NA	84	55	17	13	30	48
RYR1	Malignant hyperthermia	19:39070706	180901	14449A>T	rs143988412	141	298	260	29	18	211		TSC2	Tuberous sclerosis	16.2134	191092	4005+1G>T	rs45517324	81	59	22	13	32	55
RYR1	Myopathy, congenital with cores	19:39071022	180901	14524G>A	rs193922879	59	131	506	105	18	121		TSC2	Tuberous sclerosis	16.2134	191092	4006-2A>G	NA	78	0	58	7	22	129
RYR1	Central core disease	19:39071043	180901	14545G>A	rs118192168	54	133	493	108	19	128		TSC2	Tuberous sclerosis	16.2134	191092	4037C>A	rs45517326	21	0	752	0	38	55
RYR1	Central core disease	19:39075677	180901	14741G>C	rs118192154	28	113	147	17	23	82		TSC2	Tuberous sclerosis	16.2135	191092	4289G>A	rs45507198	40	136	285	123	19	162
RYR1	Myopathy, congenital	19:39075685	180901	14749T>C	NA	27	141	186	14	27	93		TSC2	Tuberous sclerosis	16.2135	191092	4290G>A	rs45517334	41	135	288	129	18	159
RYR1	Central core disease	19:39075688	180901	14752G>A	NA	35	175	208	16	29	94		TSC2	Tuberous sclerosis	16.2135	191092	4298C>A	rs45517335	41	135	298	130	19	161
RYR1	Central core disease	19:39075695	180901	14759C>A	rs118192155	36	182	211	15	31	93		TSC2	Tuberous sclerosis	16.2135	191092	4313G>A	rs45448791	40	134	287	127	18	161
RYR2	Catecholaminergic polymorphic ventricular tachycardia	1:237494193	180902	184C>T	NA	63	70	347	12	22	139		TSC2	Tuberous sclerosis	16.2135	191092	4318C>T	rs45517337	37	130	273	126	15	140
RYR2	Arrhythmogenic right ventricular dysplasia type 2	1:237494239	180902	230C>T	NA	61	68	352	12	23	138		TSC2	Tuberous sclerosis	16.2136	191092	4663-1G>A	rs45517358	27	34	28	4	27	226
RYR2	Catecholaminergic polymorphic ventricular tachycardia	1:23749425	180902	241A>C	NA	60	61	345	17	24	140		TSC2	Tuberous sclerosis	16.2136	191092	4667delA	rs137854416	30	37	32	8	29	234
RYR2	Ventricular tachycardia, polymorphic	1:237540649	180902	490C>T	NA	58	60	346	17	24	134		TSC2	Tuberous sclerosis	16.2136	191092	4672G>A	rs45517360	31	38	32	8	29	241
RYR2	Ventricular tachycardia, polymorphic	1:237540665	180902	506G>A	NA	58	59	340	17	23	133		TSC2	Tuberous sclerosis	16.2136	191092	4685T>C	rs45517362	42	50	33	4	24	343
RYR2	Arrhythmogenic right ventricular dysplasia type 2	1:237540686	180902	527G>A	NA	50	52	299	17	26	122		TSC2	Tuberous sclerosis	16.2136	191092	4695delG	rs137854171	42	49	34	4	24	354
RYR2	Ventricular tachycardia, polymorphic	1:237540715	180902	556G>A	rs201211033	46	51	270	18	26	115		TSC2	Tuberous sclerosis	16.2136	191092	4712A>G	rs45478894	98	68	325	56	19	65
RYR2	Catecholaminergic polymorphic ventricular tachycardia	1:237540726	180902	567A>T	NA	45	51	280	19	27	114		TSC2	Tuberous sclerosis	16.2136	191092	4780C>A	rs45511204	23	23	26	5	20	105
RYR2	Long QT syndrome	1:237550653	180902	649A>G	rs200642525	66	110	148	13	19	62		TSC2	Tuberous sclerosis	16.2136	191092	4783G>A	rs45517369	26	30	24	4	20	79
RYR2	Catecholaminergic polymorphic ventricular tachycardia	1:237551398	180902	688G>T	NA	84	132	193	15	25	73		TSC2	Tuberous sclerosis	16.2136	191092	4790T>C	rs45517370	33	37	20	3	26	65
RYR2	Catecholaminergic polymorphic ventricular tachycardia	1:237551429	180902	719A>G	NA	81	135	183	16	24	72		TSC2	Tuberous sclerosis	16.2136	191092	4846C>T	rs45455296	88	198	46	18	30	209
RYR2	Catecholaminergic polymorphic ventricular tachycardia	1:237551435	180902	725A>T	NA	83	144	180	18	21	75		TSC2	Tuberous sclerosis	16.2136	191092	4849+1G>A	rs45517375	94	235	50	19	28	235
RYR2	Catecholaminergic polymorphic ventricular tachycardia	1:237551437	180902	727G>A	NA	87	150	185	19	23	76		TSC2	Tuberous sclerosis	16.2137	191092	4850-3C>G	NA	96	246	56	19	31	246
RYR2	Catecholaminergic polymorphic ventricular tachycardia	1:237586537	180902	994C>T	NA	85	145	233	21	18	68		TSC2	Tuberous sclerosis	16.2137	191092	4856T>C	rs45514993	116	316	91	17	29	286
RYR2	Catecholaminergic polymorphic ventricular tachycardia	1:237604682	180902	1069G>A	NA	79	130	249	21	13	76		TSC2	Tuberous sclerosis	16.2137	191092	4925delG	rs137854156	72	94	5	39	24	115
RYR2	Long QT syndrome	1:237608728	180902	1198G>C	NA	75	132	259	21	19	73		TSC2	Tuberous sclerosis	16.2137	191092	4925G>A	rs137854343	72	94	5	39	24	115
RYR2	Catecholaminergic polymorphic ventricular tachycardia	1:237608747	180902	1217C>T	NA	73	133	255	21	19	73		TSC2	Tuberous sclerosis	16.2137	191092	4927A>C	rs45517379	72	91	4	40	24	114
RYR2	Catecholaminergic polymorphic ventricular tachycardia	1:237608767	180902	1237T>A	NA	62	118	245	31	19	84		TSC2	Tuberous sclerosis	16.2137	191092	4928A>T	rs45517380	78	99	5	42	23	115
RYR2	Catecholaminergic polymorphic ventricular tachycardia	1:237777856	180902	5428G>C	NA	57	117	158	19	27	75		TSC2	Tuberous sclerosis	16.2137	191092	4928A>G	NA	78	99	5	42	23	115
RYR2	Catecholaminergic polymorphic ventricular tachycardia	1:237789072	180902	6134A>G	NA	55	121	137	17	33	80		TSC2	Tuberous sclerosis	16.2137	191092	4929C>G	rs45517381	84	108	11	40	21	118
RYR2	Catecholaminergic polymorphic ventricular tachycardia	1:237791277	180902	6337G>A	rs186906598	58	119	133	17	29	84		TSC2	Tuberous sclerosis	16.2137	191092	4937T>G	NA	93	131	15	39	26	129
RYR2	Catecholaminergic polymorphic ventricular tachycardia	1:23779479	180902	6504C>G	NA	57	117	124	19	31	84		TSC2	Tuberous sclerosis	16.2138	191092	5024C>T	rs45483392	104	86	61	24	18	95
RYR2	Sudden cardiac death	1:237794818	180902	6532G>A	NA	54	116	123	19	30	83		TSC2	Tuberous sclerosis	16.2138	191092	5025delG	rs137854382	132	132	106	23	18	163
RYR2	Catecholaminergic polymorphic ventricular tachycardia	1:237796971	180902	6649C>T	NA	41	102	60	19	29	73		TSC2	Tuberous sclerosis	16.2138	191092	5053delC	rs137854060	54	82	39	11	33	124
RYR2	Ventricular tachycardia, polymorphic	1:237798261	180902	6761C>T	NA	32	88	112	19	23	60		TSC2	Tuberous sclerosis	16.2138	191092	5056C>T	rs45517388	48	72	31	11	33	107
RYR2	Sudden infant death syndrome	1:237801664	180902	6800G>A	NA	30	86	115	17	21	60		TSC2	Tuberous sclerosis	16.2138	191092	5057A>C	NA	55	75	35	11	31	112
RYR2	Ventricular tachycardia, polymorphic	1:23780178	180902	6916G>A	NA	24	83	143	19	27	47		TSC2	Tuberous sclerosis	16.2138	191092	5068G>T	rs137854882	42	75	15	37	19	104
RYR2	Catecholaminergic polymorphic ventricular tachycardia	1:237801783	180902	6919T>C	NA	19	74	158	21	27	52		TSC2	Tuberous sclerosis	16.2138	191092	5069-18A>G	rs45484794	46	75	18	33	17	103
RYR2	Ventricular tachycardia, polymorphic	1:237802319	180902	6933G>T	NA	19	75	157	21	28	52		TSC2	Tuberous sclerosis	16.2138	191092	5069-2A>G	rs45487291	48	79	18	40	18	108
RYR2	Sudden unexplained death	1:237802347	180902	6961G>A	NA	12	75	211	30	35	67		TSC2	Tuberous sclerosis	16.2138	191092	5126C>T	rs45517393	45	55	13	37	22	68
RYR2	Ventricular tachycardia, polymorphic	1:237802368	180902	6982C>T	rs121918603	8	81	252	36	39	89		TSC2	Tuberous sclerosis	16.2138	191092	5126C>G	rs45517393	45	55	13	37	22	68
RYR2	Ventricular tachycardia, polymorphic	1:237802378	180902	6992T>C	NA	11	58	257	36	36	103		TSC2	Tuberous sclerosis	16.2138	191092	5160+4A>G	rs45517403	87	100	15	40	27	114
RYR2	Ventricular tachycardia, polymorphic	1:237802462	180902	7076G>A	NA	7	53	262	36	35	107		TSC2	Tuberous sclerosis	16.2138	191092	5167T>C	rs45517408	39	33	8	63	9	212
RYR2	Arrhythmogenic right ventricular dysplasia type 2	1:237804238	180902	7157A>T	rs121918601	7	51	275	37	36	108		TSC2	Tuberous sclerosis	16.2138	191092	5170_5171delCA	rs137854085	41	35	9	62	12	220
RYR2	Ventricular tachycardia, polymorphic	1:23780424	180902	7159G>C	NA	8	46	275	37	30	112		TSC2	Tuberous sclerosis	16.2138	191092	5170C>T	rs45472701	41	35	9	62	12	220
RYR2	Ventricular tachycardia, polymorphic	1:23780424	180902	7159G>A	NA	8	46	275	37	30	112		TSC2	Tuberous sclerosis	16.2138	191092	5192delA	NA	41	44	10	76	13	215
RYR2	Ventricular tachycardia, polymorphic	1:237804256	180902	7175A>G	NA	7	44	268	39	30	111		TSC2	Tuberous sclerosis	16.2138	191092	5208C>A	rs45517410	44	55	17	105	20	230
RYR2	Catecholaminergic polymorphic ventricular tachycardia	1:237804262	180902	7181C>G	NA	6	39	274	43	28	120		TSC2	Tuberous sclerosis	16.2138	191092	5220G>A	rs45517411	46	58	15	108	18	219
RYR2	Ventricular tachycardia, polymorphic	1:237804283	180902	7202G>A	NA	7	35	276	42	29	123		TSC2	Tuberous sclerosis	16.2138	191092	5254C>T	rs45517414	31	73	33	118	19	248
RYR2	Ventricular tachycardia, polymorphic	1:237804283	180902	7202G>T	NA	7	35	276	42	29	123		TSC2	Tuberous sclerosis	16.2138	191092	5259+1delG	NA	29	65	26	102	16	226
RYR2	Catecholaminergic polymorphic ventricular tachycardia	1:237804286	180902	7205G>A	NA	7	32	269	42	28	124		TSC2	Tuberous sclerosis	16.2139	191092	5318A>C	rs45517418	28	65	25	104	18	226
RYR2	Ventricular tachycardia, polymorphic	1:237804288	180902	7207G>A	NA	7	24	281	41	25	124		TSC2	Tuberous sclerosis	16.2139	191092	5321G>C	rs9209	28	64	13	109	23	229
RYR2	Catecholaminergic polymorphic ventricular tachycardia	1:237804291	180902	7210C>A	NA	6	21	287	41	25	123		TSC2	Tuberous sclerosis	16.2139	191092	5365G>C	rs45517420	42.33	35.67	6.33	51	37.33	75.33
RYR2	Catecholaminergic polymorphic ventricular tachycardia	1:237806663	180902	7258A>T	NA	7	21	280	38	24	123		TSC2	Tuberous sclerosis	16.2139	191092	5378G>A	rs45506695	44	37	9	53	36	80
RYR2	Ventricular tachycardia, polymorphic	1:237811823	180902	7422G>C	rs121918598	6	19	282	39	23	124		TSC2	Tuberous sclerosis and lymphangiomyomatosis	16.2139	191092	5383C>T	rs45517423	38	39	11	56	32	76
RYR2	Catecholaminergic polymorphic ventricular tachycardia	1:237811824	180902	7423G>T	NA	6	20	287	41	28	127		TSC2	Tuberous sclerosis	16.2139	191092	5386C>A	rs45455398	30	40	12	52	30	64
RYR2	Catecholaminergic polymorphic ventricular tachycardia	1:237811848	180902	7447T>A	NA	6	20	281	40	28	127
RYR2	Catecholaminergic polymorphic ventricular tachycardia	1:237811894	180902	7493C>T	NA	6	20	290	40	28	128
RYR2	Arrhythmogenic right ventricular dysplasia type 2	1:237811912	180902	7511C>T	NA	6	21	286	40	27	130
RYR2	Catecholaminergic polymorphic ventricular tachycardia	1:237813192	180902	7528A>G	NA	4	15	261	39	32	136
RYR2	Ventricular tachycardia, polymorphic	1:23795478	180902	13528G>A	NA	63	19	149	24	19	56
RYR2	Catecholaminergic polymorphic ventricular tachycardia	1:237955364	180902	13564-41A>G	rs114289907	67	25	136	21	19	59
RYR2	Catecholaminergic polymorphic ventricular tachycardia	1:237958608	180902	13933T>A	NA	156	92	129	101	18	81
RYR2	Catecholaminergic polymorphic ventricular tachycardia	1:237961389	180902	14009T>A	NA	8	147	277	249	43	84
RYR2	Catecholaminergic polymorphic ventricular tachycardia	1:237995928	180902	14885A>G	NA	116	233	152	18	19	162
SCN5A	Long QT syndrome	3:38592174	600163	5689C>T	rs45465995	143	203	243	19	42	151
SCN5A	Atrial fibrillation	3:38592239	600163	5624T>C	rs199473324	143	201	231	17	38	148
SCN5A	Brugada syndrome	3:38592247	600163	5616G>C	rs199473323	146	200	233	17	38	147
SCN5A	Brugada syndrome	3:38592282	600163	5581G>A	rs199473636	145	200	232	18	43	148
SCN5A	Brugada syndrome	3:38592314	600163	5549G>C	rs199473322	40.12	194.5	251.75	17.75	41.62	115.12
SCN5A	Long QT syndrome	3:38592347	600163	5516A>G	rs199473321	40	192	246	16	41	114
SCN5A	Cardiomyopathy, dilated	3:38592356	600163	5507T>C	rs45563942	38	192	244	17	42	115
SCN5A	Brugada syndrome	3:38592369	600163	5494C>G	rs199473320	40	196	255	18	41	120
SCN5A	Sudden infant death syndrome	3:38592386	600163	5477G>A	rs137854610	40	206	255	17	44	118
SCN5A	Brugada syndrome	3:3859248	600163	5383T>C	rs137854615	40	218	300	19	34	122
SCN5A	Cardiac sinus node dysfunction	3:38592489	600163	5374G>A	NA	40	218	300	19	34	122
SCN5A	Long QT syndrome	3:38592494	600163	5369A>G	rs199473317	41	210	310	19	27	125
SCN5A	Sick sinus syndrome, autosomal recessive	3:38592495	600163	5368G>A	NA	39.5	210	309	19	29	121
SDHB	Paraganglioma	1:17345439	185470	780delG	NA	113	236	149	18	20	164
SDHB	Paraganglioma	1:17349223	185470	645delC	NA	60.5	53	158.5	83	18.5	47.5
SDHB	Cowden-like syndrome	1:17355159	185470	359A>G	NA	128	214	161	46	18	167
SDHB	Phaeochromocytoma	1:17371289	185470	167C>T	NA	71	182	377	18	21	94
SDHB	Paraganglioma	1:17371298	185470	158G>A	rs34916635	30	112	41	10	42	82
SDHB	Phaeochromocytoma	1:17371299	185470	157G>A	NA	30	114	39	10	44	80
SDHB	Paraganglioma	1:17380445	185470	70C>T	NA	13	131	137	134	38	94
SDHB	Paraganglioma	1:17380466	185470	49A>G	NA	12	144	175	138	40	101
SDHB	Paraganglioma	1:17380466	185470	49delA	NA	12	144	175	138	40	101
SDHC	Paraganglioma	1:161293426	602413	43C>T	rs201286421	80	217	127	176	17	177
SDHD	Paraganglioma	11:111959645	602690	224delT	NA	30	146	42	46	18	80
SDHD	Paraganglioma	11:111959698	602690	277delT	NA	79	226	237	48	19	144
SDHD	Phaeochromocytoma	11:111959717	602690	296delT	NA	100	216	265	47	18	140
SDHD	Paraganglioma	11:111959723	602690	302T>C	NA	100	222	270	49	17	146
SDHD	Paraganglioma	11:111959725	602690	304C>T	NA	108	222	278	49	19	150
SDHD	Paraganglioma	11:111959726	602690	305A>T	rs104894302	110	220	294	52	18	144
SDHD	Paraganglioma	11:111959726	602690	305A>C	NA	110	220	294	52	18	144
SDHD	Paraganglioma	11:111959726	602690	305A>G	NA	110	220	294	52	18	144
STK11	Peutz-Jeghers syndrome	19:1219375	602216	427delG	NA	12	121	337	35	33	96
STK11	Peutz-Jeghers syndrome	19:1220487	602216	580G>A	rs121913315	141	145	169	73	19	130
STK11	Peutz-Jeghers syndrome	19:1221239	602216	762delC	NA	43	144	226	19	32	98
STK11	Peutz-Jeghers syndrome	19:1221244	602216	767A>C	NA	93	322	55	91	19	225
TGFBR1	Marfan syndrome II	9:101900325	190181	759G>A	NA	25	173	281	162	16	90
TGFBR1	Loeys-Dietz syndrome	9:101900362	190181	796G>T	NA	25	175	278	161	15	90
TGFBR1	Marfan syndrome II	9:101900365	190181	799A>C	NA	25	182	287	166	16	98
TGFBR1	Multiple self-healing squamous epithelioma	9:101904816	190181	806-2A>C	NA	26	185	302	163	15	100
TGFBR1	Marfan syndrome II	9:101904946	190181	934G>A	NA	26	184	299	168	17	101
TGFBR1	Aortic aneurysm, thoracic	9:101904956	190181	944A>G	NA	26	189	328	169	18	106
TGFBR1	Loeys-Dietz aortic aneurysm syndrome	9:101904965	190181	953T>G	rs121918710	28	197.71	348	169.14	16.86	111.14
TGFBR1	Multiple self-healing squamous epithelioma	9:10190702	190181	980delC	NA	29.94	205.47	351.18	170.65	17.71	115.47
TGFBR1	Marfan syndrome II	9:101907043	190181	1003A>C	NA	30.5	206.8	352.6	171.1	17.8	115.6
TGFBR1	Loeys-Dietz aortic aneurysm syndrome	9:101907089	190181	1049C>A	NA	30	211	352	173	18	115
TGFBR1	Loeys-Dietz syndrome, type I	9:101907092	190181	1052A>G	NA	30	209	348	171	18	112
TNNI3	Cardiomyopathy, hypertrophic	19:55663225	191044	610C>T	NA	0	0	2	0	36	39
TNNI3	Cardiomyopathy, dilated	19:55665403	191044	544G>A	NA	133	234	287	77	18	212
TNNI3	Cardiomyopathy, hypertrophic	19:55665426	191044	521A>T	NA	120	231	280	65	19	198
TNNI3	Cardiomyopathy, restrictive	19:55665436	191044	511G>A	rs121917761	120	231	280	65	19	198
TNNI3	Cardiomyopathy, hypertrophic	19:55665438	191044	509G>A	NA	116	228	270	68	18	200
TNNI3	Cardiomyopathy, restrictive	19:55665445	191044	502delG	NA	110	224	249	66	15	186
TNNI3	Cardiomyopathy, hypertrophic	19:55665447	191044	500T>C	NA	114	228	273	70	17	197
TNNI3	Cardiomyopathy, hypertrophic	19:5566545	191044	497C>T	NA	112	226	280	70	18	200
TNNT2	Cardiomyopathy, dilated	1:201331116	191045	614G>T	rs121964860	87	206	185	48	17	132
TP53	Breast cancer, increased risk	17:7577107	191170	831T>A	NA	17	139	103	379	31	98
TP53	Li-Fraumeni syndrome	17:7579601	191170	97-11C>G	NA	19	163	58	67	34	112
TP53	Breast cancer ?	17:7579618	191170	97-28T>A	rs200989844	18	162	60	70	31	111
TP53	Gastric cancer	17:7579705	191170	91G>A	NA	18.67	171.83	72.22	66.33	30.39	108.17
TP53	Myelodysplastic/myeloproliferative disease	17:7579882	191170	31G>C	NA	18	170	65	68	31	109
TSC1	Tuberous sclerosis	9:135776225	605284	2503-1G>T	rs118203705	15.25	278.25	533.62	66.38	29.88	202.88
TSC1	Tuberous sclerosis	9:135776225	605284	2503-1G>A	NA	15.25	278.25	533.62	66.38	29.88	202.88
TSC1	Tuberous sclerosis	9:135776225	605284	2503-1G>C	NA	15.25	278.25	533.62	66.38	29.88	202.88
TSC1	Tuberous sclerosis	9:135776226	605284	2503-2A>G	rs118203704	14	275	523	64	31	204
TSC1	Tuberous sclerosis	9:135776981	605284	2497C>T	rs118203700	14	267	511	61	26	203
TSC1	Tuberous sclerosis	9:135778098	605284	2285A>G	rs118203670	1	7	19	2	32	52
TSC1	Tuberous sclerosis	9:135778098	605284	2281_2284dupTACA	NA	1	7	19	2	32	52
TSC1	Tuberous sclerosis	9:135779842	605284	1998-1G>A	rs118203614	15	163	199	87	35	123
TSC1	Tuberous sclerosis	9:135779843	605284	1998-2A>T	NA	18	216	259	95	27	152
TSC1	Tuberous sclerosis	9:135780967	605284	1997+1G>A	rs118203610	18	218	276	94	26	153
TSC1	Tuberous sclerosis	9:135781124	605284	1841delA	rs118203589	43	68	346	48	19	45
TSC1	Tuberous sclerosis	9:13578114	605284	1825G>T	rs118203587	47	70	357	49	19	51
TSC1	Tuberous sclerosis	9:135781268	605284	1697delC	rs118203563	69	67	555	59	18	70
TSC1	Tuberous sclerosis	9:135781278	605284	1687delG	rs118203561	70	63	556	58	19	70
TSC1	Tuberous sclerosis	9:135786503	605284	1030-3C>G	rs118203488	80	72	446	17	31	91
TSC1	Tuberous sclerosis	9:135786839	605284	1029+1G>A	rs118203485	77	74	477	19	26	109
TSC1	Tuberous sclerosis	9:135786896	605284	973C>T	rs118203474	57	68	498	19	20	150
TSC1	Tuberous sclerosis	9:135786933	605284	936C>A	rs118203472	52	71	500	18	20	154
TSC1	Tuberous sclerosis	9:135787757	605284	825T>G	rs118203454	18	34	190	20	25	84
TSC1	Tuberous sclerosis	9:135787768	605284	814G>T	NA	18.67	33	186.33	21	24.33	85.33
TSC1	Tuberous sclerosis	9:135787769	605284	813T>A	rs118203452	18	33	183	22	24	84
TSC1	Tuberous sclerosis	9:13578781	605284	772G>T	rs118203450	17	31	166	21	24	81
TSC1	Tuberous sclerosis	9:135787833	605284	749T>A	rs118203447	16	31	171	21	23	82
TSC1	Tuberous sclerosis	9:135787833	605284	749T>G	rs118203447	16	31	171	21	23	82
TSC1	Tuberous sclerosis	9:135787833	605284	749delT	rs118203445	16	31	171	21	23	82
TSC1	Tuberous sclerosis	9:135787837	605284	745delA	rs118203444	90	119	269	12	33	93
TSC1	Tuberous sclerosis	9:135787837	605284	745A>T	rs118203443	90	119	269	12	33	93
TSC1	Tuberous sclerosis	9:135796749	605284	737+1delG	NA	88	121	267	11	32	92
TSC1	Tuberous sclerosis	9:135796749	605284	737+1G>A	rs118203438	88	121	267	11	32	92
TSC1	Tuberous sclerosis	9:13579675	605284	737G>C	rs118203436	92	115	271	10	32	94
TSC1	Tuberous sclerosis	9:13579675	605284	737G>A	rs118203436	92	115	271	10	32	94
TSC1	Tuberous sclerosis	9:135796754	605284	733C>T	rs118203434	89	120	265	11	34	92
TSC1	Tuberous sclerosis	9:135796755	605284	732delT	rs118203433	87	116	264	11	33	90
TSC1	Tuberous sclerosis	9:135796775	605284	712A>T	NA	74	122	231	9	26	95
TSC1	Tuberous sclerosis	9:135796793	605284	694G>T	rs118203429	59	120	202	10	24	93
TSC1	Tuberous sclerosis	9:135796805	605284	682C>T	rs118203427	61	116	175	10	26	92
TSC1	Tuberous sclerosis	9:135796816	605284	671T>G	rs118203426	54.77	127.62	143.46	7.62	25.08	90
TSC1	Tuberous sclerosis	9:135797205	605284	663+1G>A	rs118203419	55	127	133	8	24	94
TSC1	Tuberous sclerosis	9:135797222	605284	647T>C	rs118203416	52	134	136	7	27	87
TSC1	Tuberous sclerosis	9:135800973	605284	363+1G>T	rs118203372	32	192	398	30	18	151
TSC1	Tuberous sclerosis	9:135800975	605284	362A>G	rs118203369	32	197	413	30	19	152
TSC1	Tuberous sclerosis	9:135800987	605284	350T>C	rs118203368	35	201	411	30	17	149
TSC1	Tuberous sclerosis	9:135801012	605284	325C>T	NA	40	208	449	33	19	167
TSC1	Tuberous sclerosis	9:13580265	605284	148delC	rs118203340	80	191	358	16	33	142
TSC1	Tuberous sclerosis	9:135802652	605284	146delA	NA	81	187	358	16	32	142
TSC1	Tuberous sclerosis	9:135802693	605284	107-2A>G	rs118203332	78	179	331	16	32	134
TSC2	Tuberous sclerosis	16:2107105	191092	775-1G>A	rs45454192	102	169	246	49	16	135
TSC2	Tuberous sclerosis	16:2107113	191092	782G>C	rs45502703	99	168	231	50	15	132
TSC2	Tuberous sclerosis	16:2107122	191092	791T>C	rs45517131	96	157	247	36	18	110
TSC2	Tuberous sclerosis	16:2108824	191092	925delC	rs137854138	5	2	6	0	26	14
TSC2	Tuberous sclerosis	16:2108825	191092	926delT	NA	4	2	6	0	24	13
TSC2	Tuberous sclerosis	16:2108871	191092	972C>A	rs45517143	25	13	18	0	28	60
TSC2	Tuberous sclerosis	16:2108871	191092	972C>G	rs45517143	25	13	18	0	28	60
TSC2	Tuberous sclerosis	16:2108875	191092	975+1G>T	NA	26	15	15	0	17	47
TSC2	Lymphangiokiomyomatosis	16:2108875	191092	975+1delG	NA	26	15	15	0	17	47
TSC2	Tuberous sclerosis	16:2110656	191092	976-15G>A	rs45517150	29	20	19	0	13	46
TSC2	Tuberous sclerosis	16:2110668	191092	976-3C>G	rs45517151	27	19	15	0	13	43
TSC2	Tuberous sclerosis	16:211067	191092	976-1G>A	rs45451199	39	26	16	0	14	42
TSC2	Tuberous sclerosis	16:211067	191092	976-1G>T	rs45451199	39	26	16	0	14	42
TSC2	Tuberous sclerosis	16:2110677	191092	982G>C	rs45517152	44	27	22	0	13	47
TSC2	Tuberous sclerosis	16:2110688	191092	993C>A	rs45517153	44	30	27	2	8	35
TSC2	Tuberous sclerosis	16:2110696	191092	1001T>G	rs45484892	49.4	35	28.6	2	10.6	32.6
[truncated: 140 more rows]
